# Supplementary material for: Technical Note – RAT: a Robustness Assessment Test for calibrated and uncalibrated hydrological models
Source: Copernicus journal article supplement (doi:10.5194/hess-2021-147), 2021-03-29
Supplement: Supplementary file 1 [file hess-2021-147-supplement.pdf]

## **Technical Note – RAT: a Robustness Assessment Test for calibrated and uncalibrated hydrological models**

Pierre Nicolle<sup>1,3</sup>, Vazken Andréassian<sup>1,\*</sup>, Paul Royer-Gaspard<sup>1</sup>, Charles Perrin<sup>1</sup>, Guillaume Thirel<sup>1</sup>, Laurent Coron<sup>2</sup>, Léonard Santos<sup>1</sup>

<sup>1</sup>Université Paris-Saclay, INRAE, UR HYCAR, 92160, Antony, France

<sup>2</sup>EDF, DTG, Toulouse, France

<sup>3</sup>now at Université Gustave Eiffel, Nantes, France

\*Corresponding author: Vazken Andréassian ([vazken.andreassian@inrae.fr](mailto:vazken.andreassian@inrae.fr))

**Supplementary Material 1: plots showing streamflow bias obtained with the RAT and the GSST as a function of temperature, precipitation and humidity index anomalies, for all test catchments**

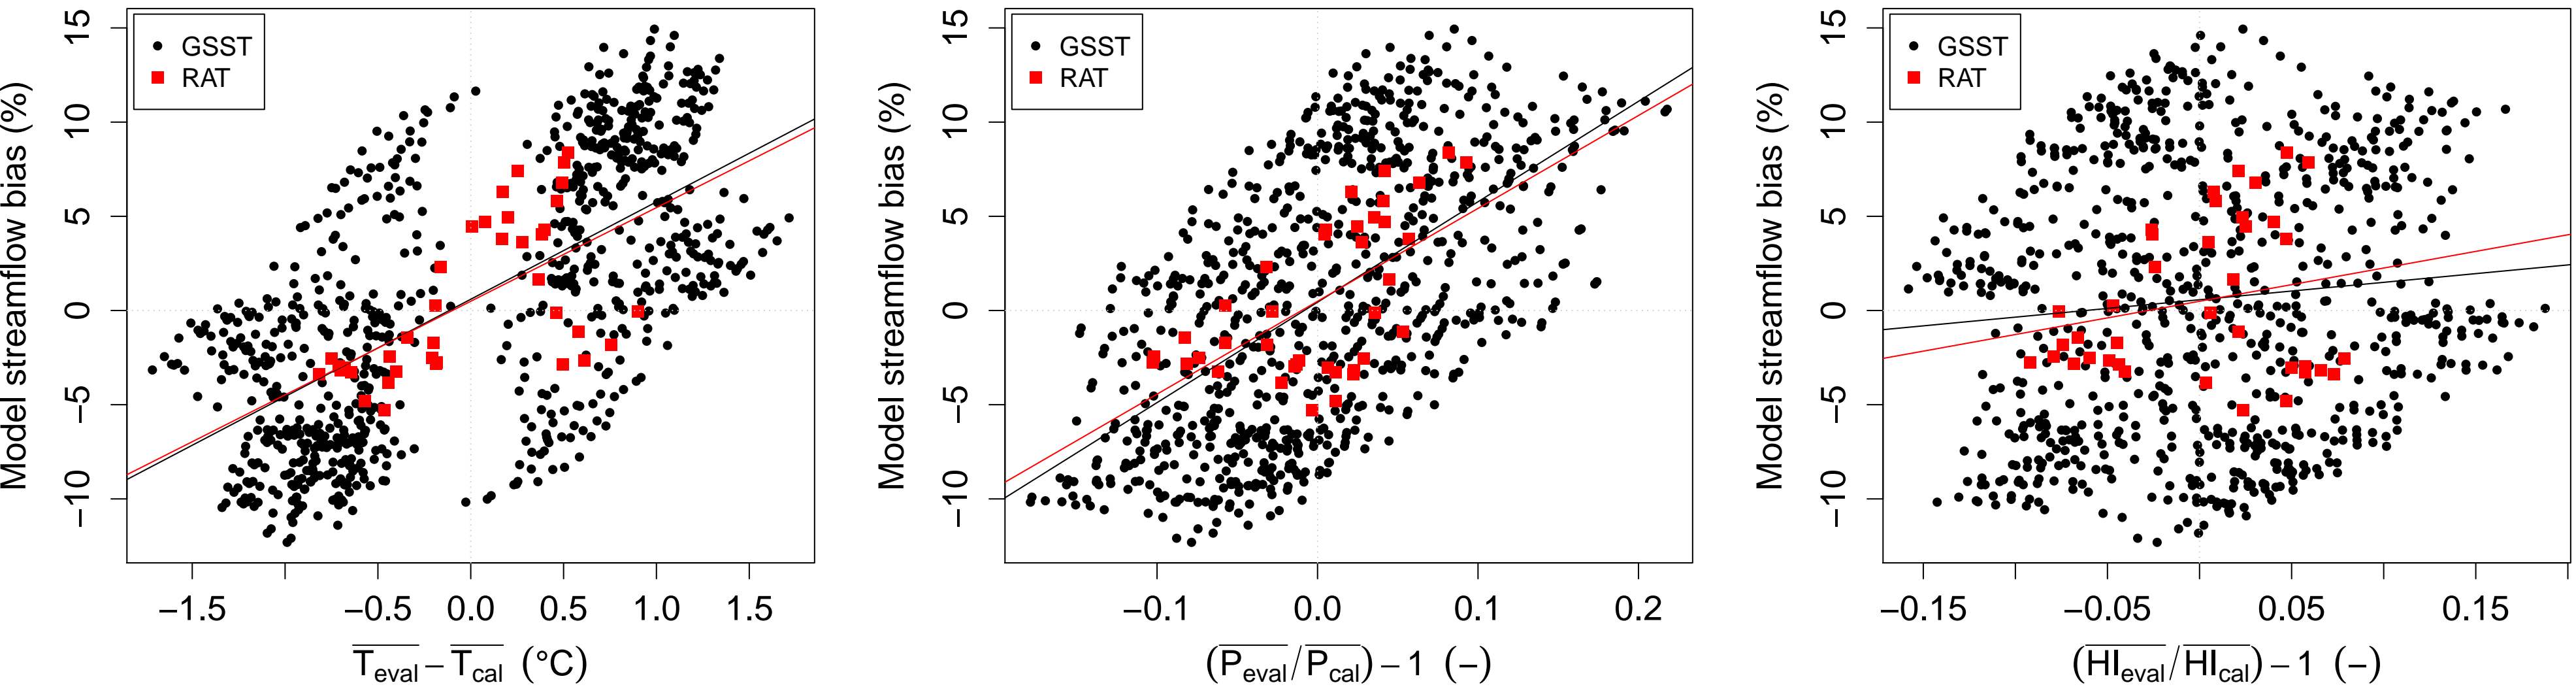

Figure 1. Streamflow bias obtained with the RAT (red squares) and the GSST (black dots), as a function of temperature, precipitation and humidity index anomalies, for the catchment A1080330

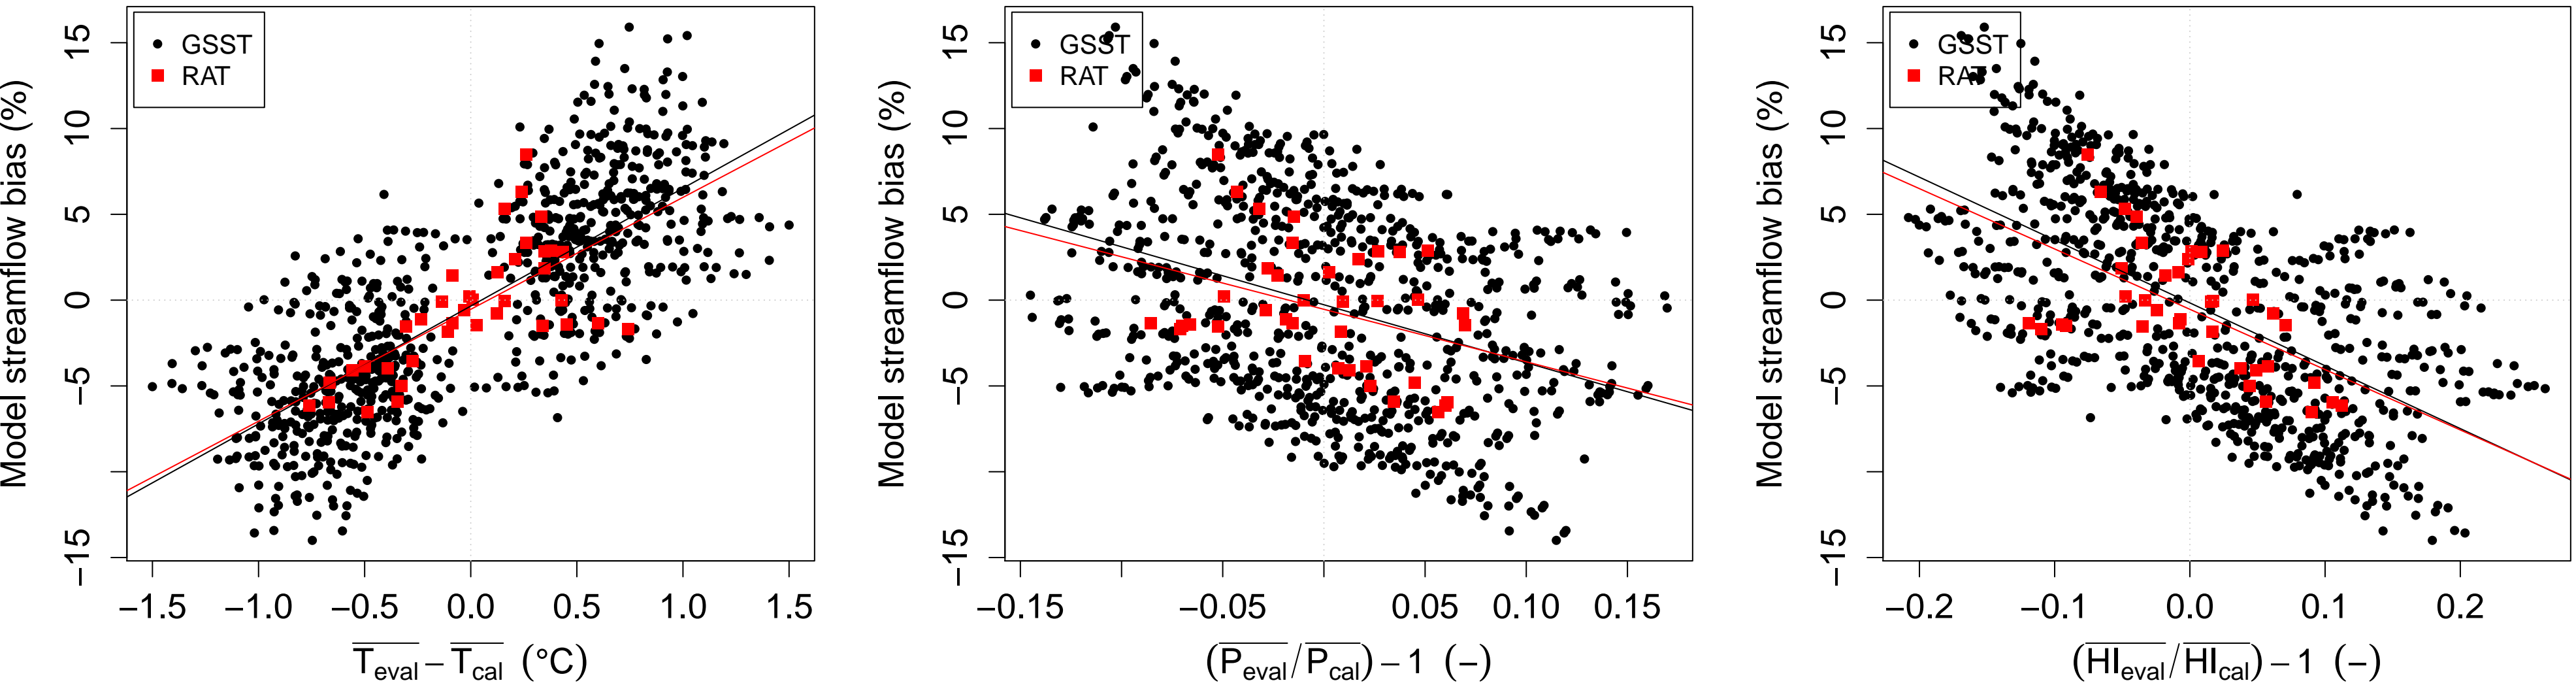

Figure 2. Streamflow bias obtained with the RAT (red squares) and the GSST (black dots), as a function of temperature, precipitation and humidity index anomalies, for the catchment B2220010

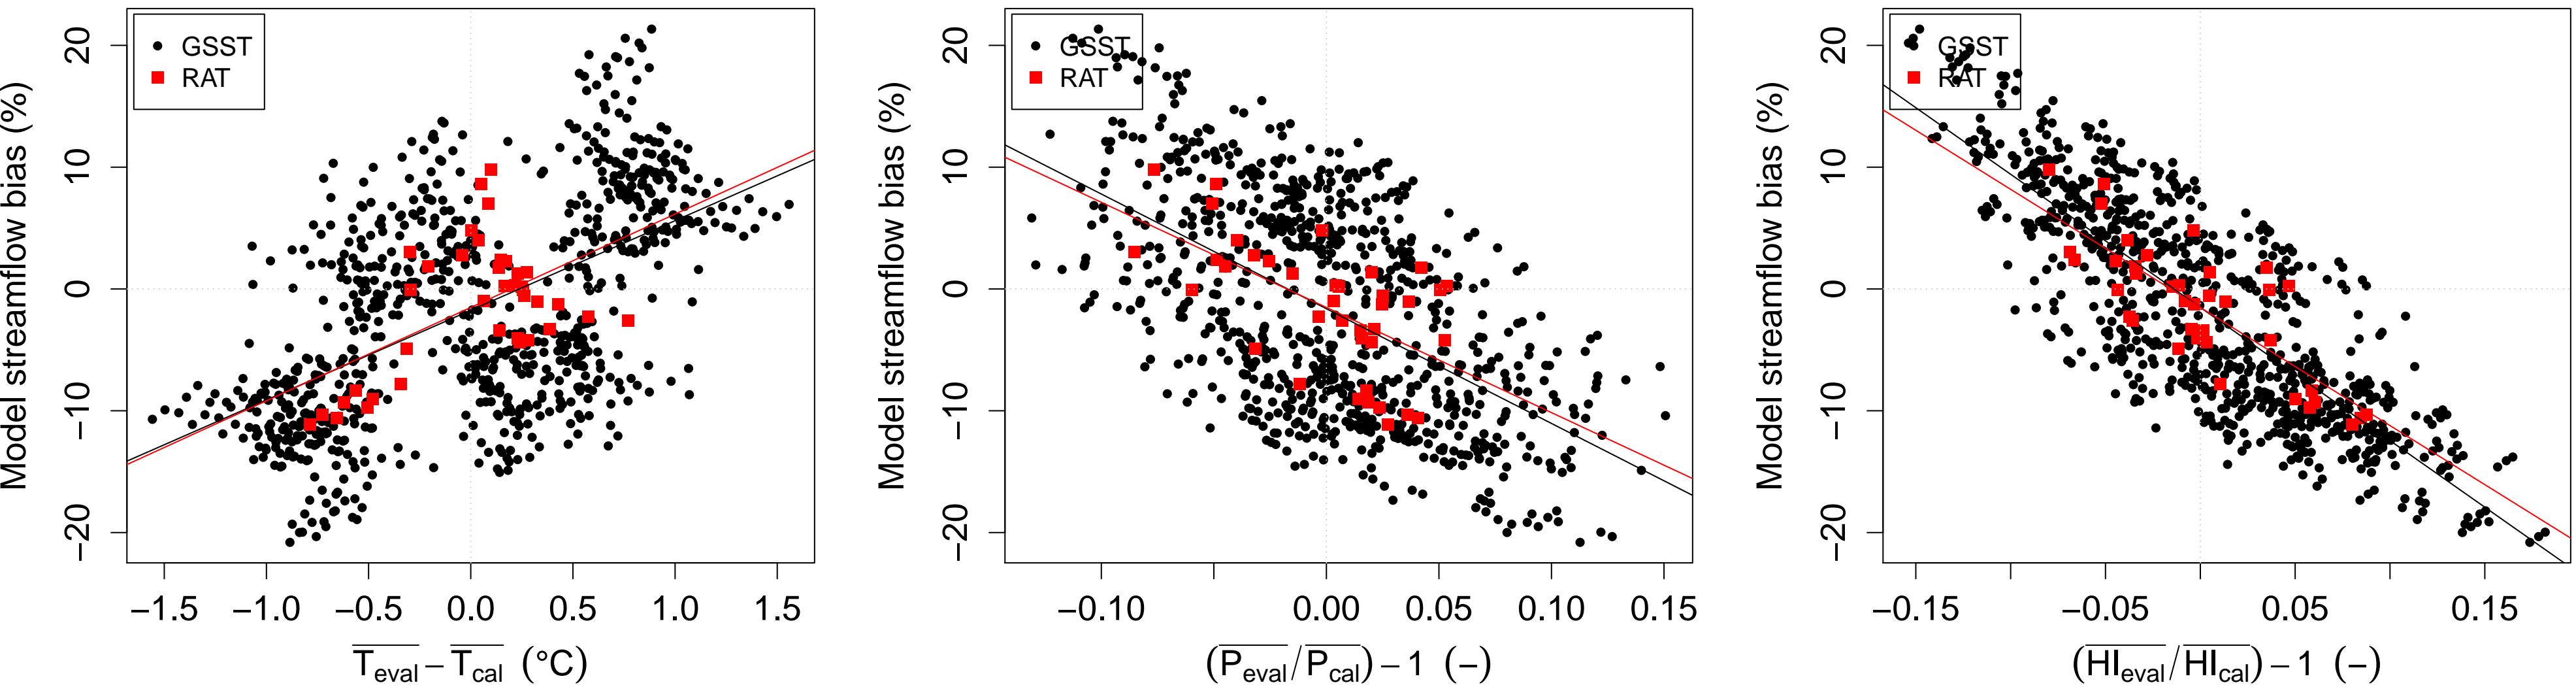

Figure 3. Streamflow bias obtained with the RAT (red squares) and the GSST (black dots), as a function of temperature, precipitation and humidity index anomalies, for the catchment H2342020

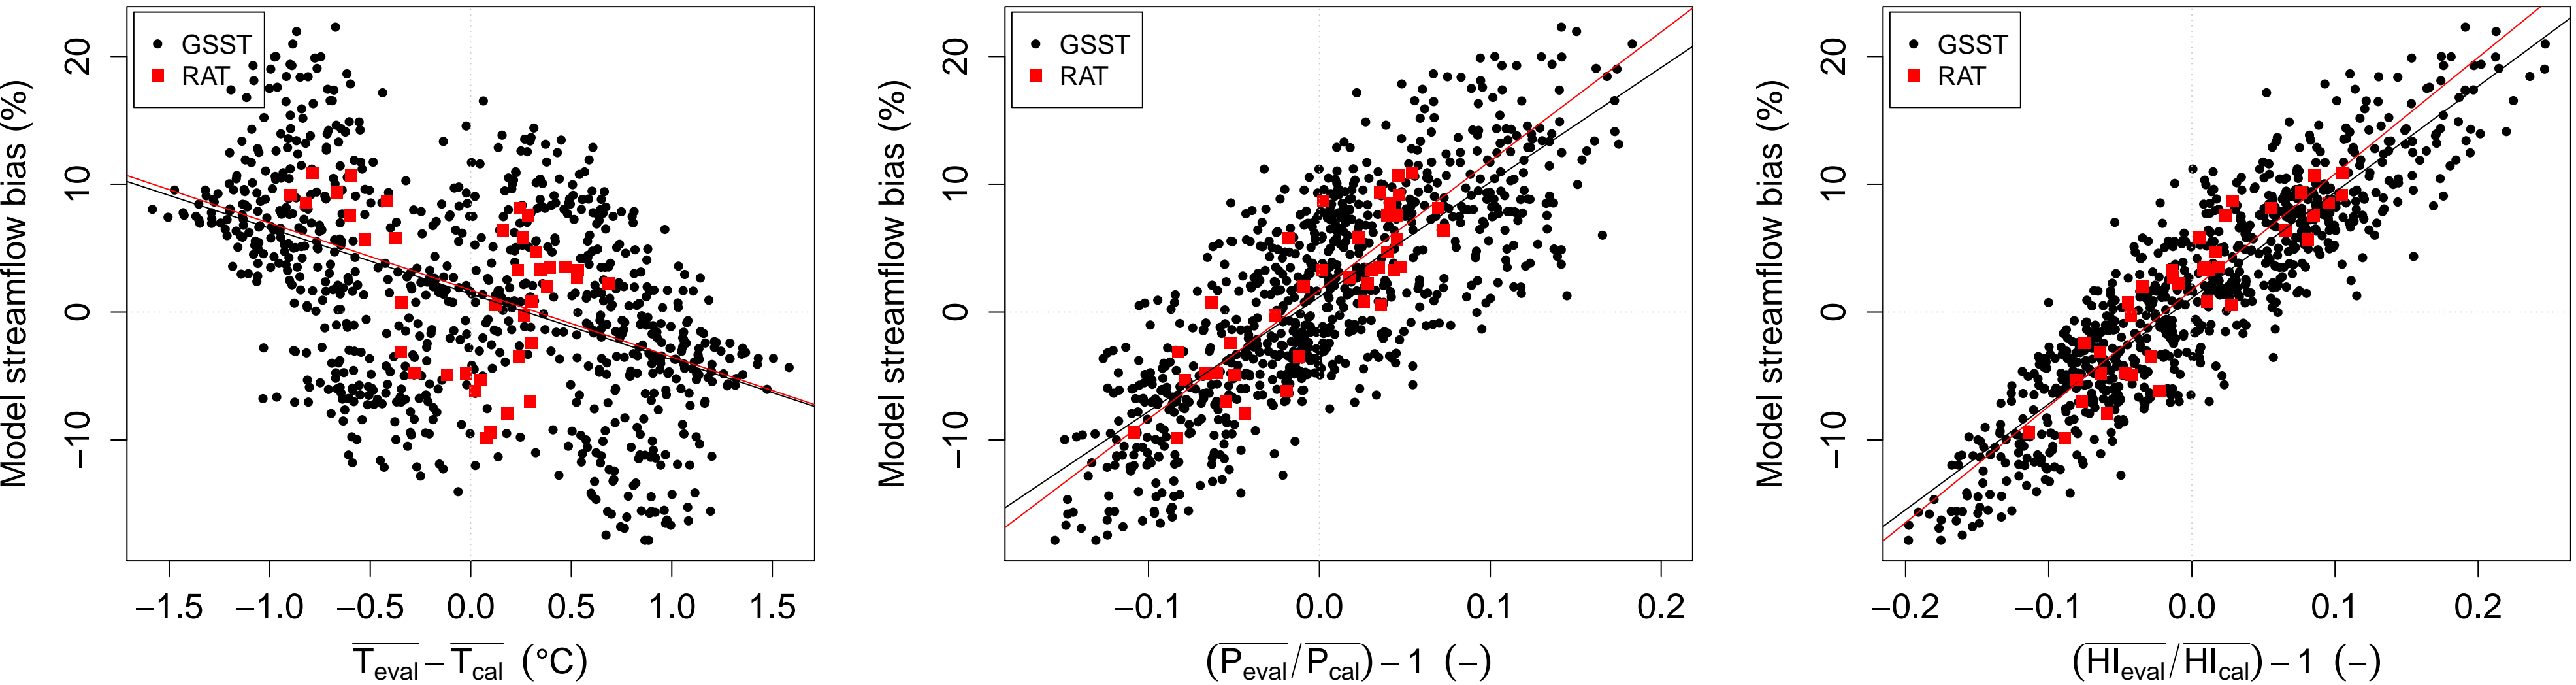

Figure 4. Streamflow bias obtained with the RAT (red squares) and the GSST (black dots), as a function of temperature, precipitation and humidity index anomalies, for the catchment H4252010

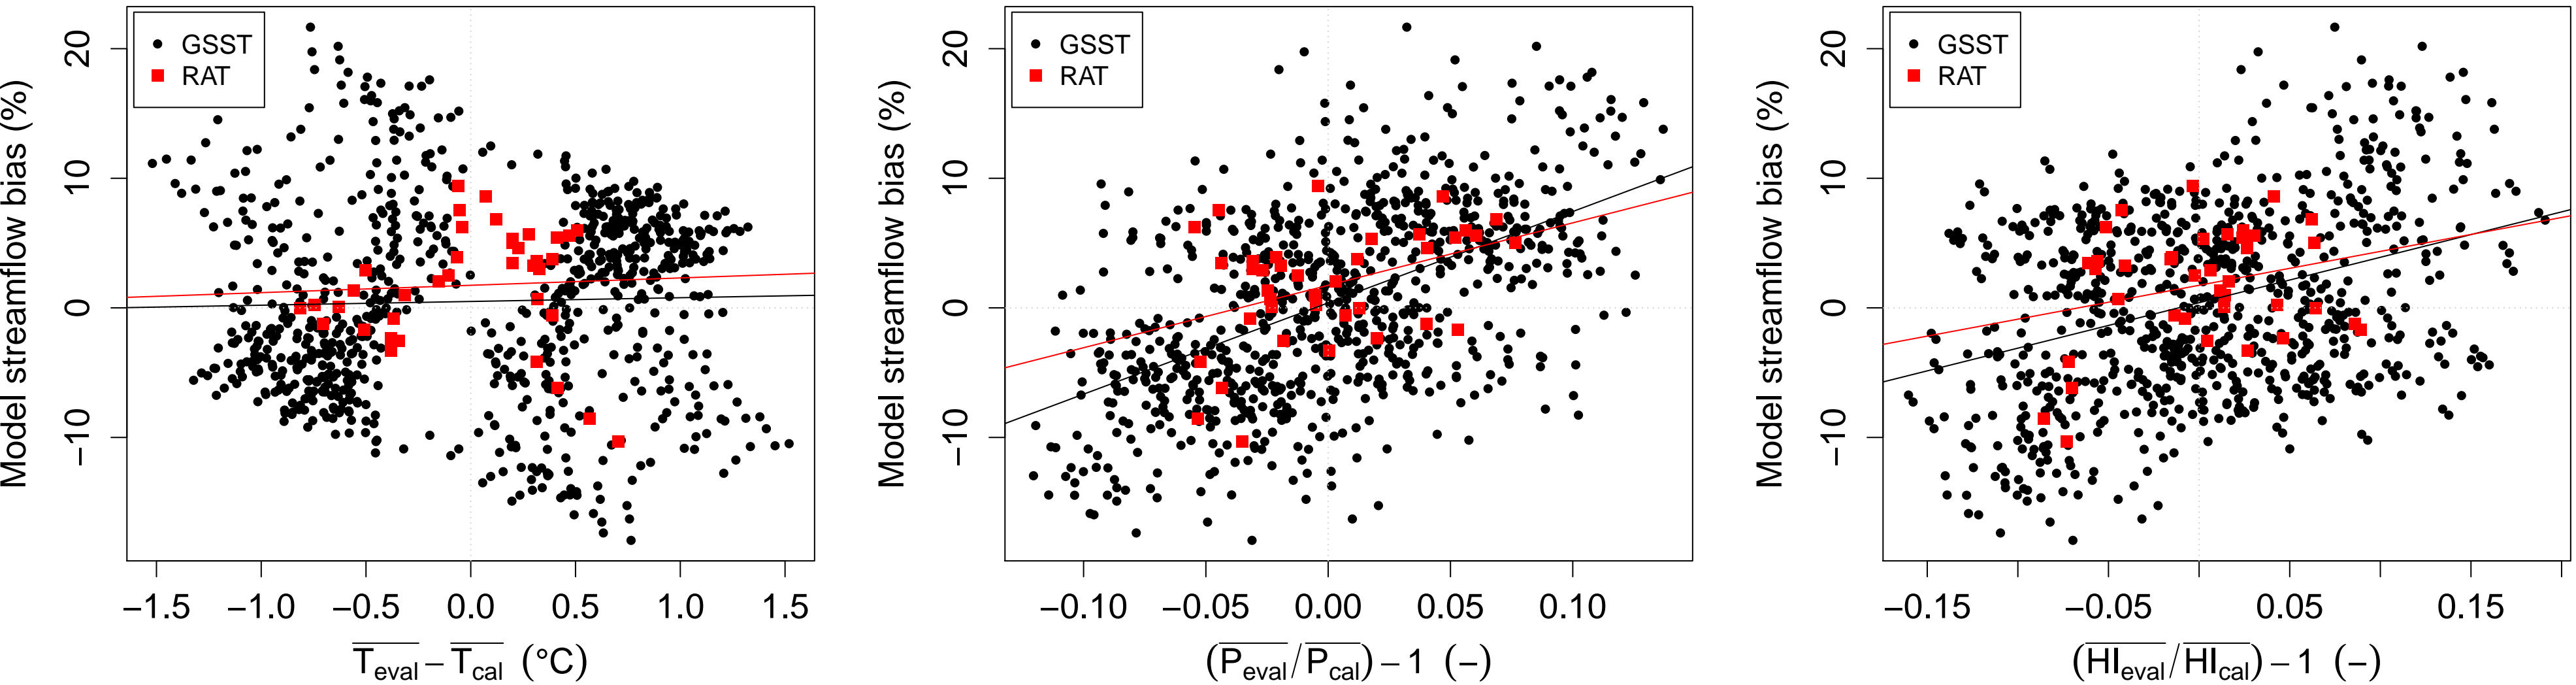

Figure 5. Streamflow bias obtained with the RAT (red squares) and the GSST (black dots), as a function of temperature, precipitation and humidity index anomalies, for the catchment H7401010

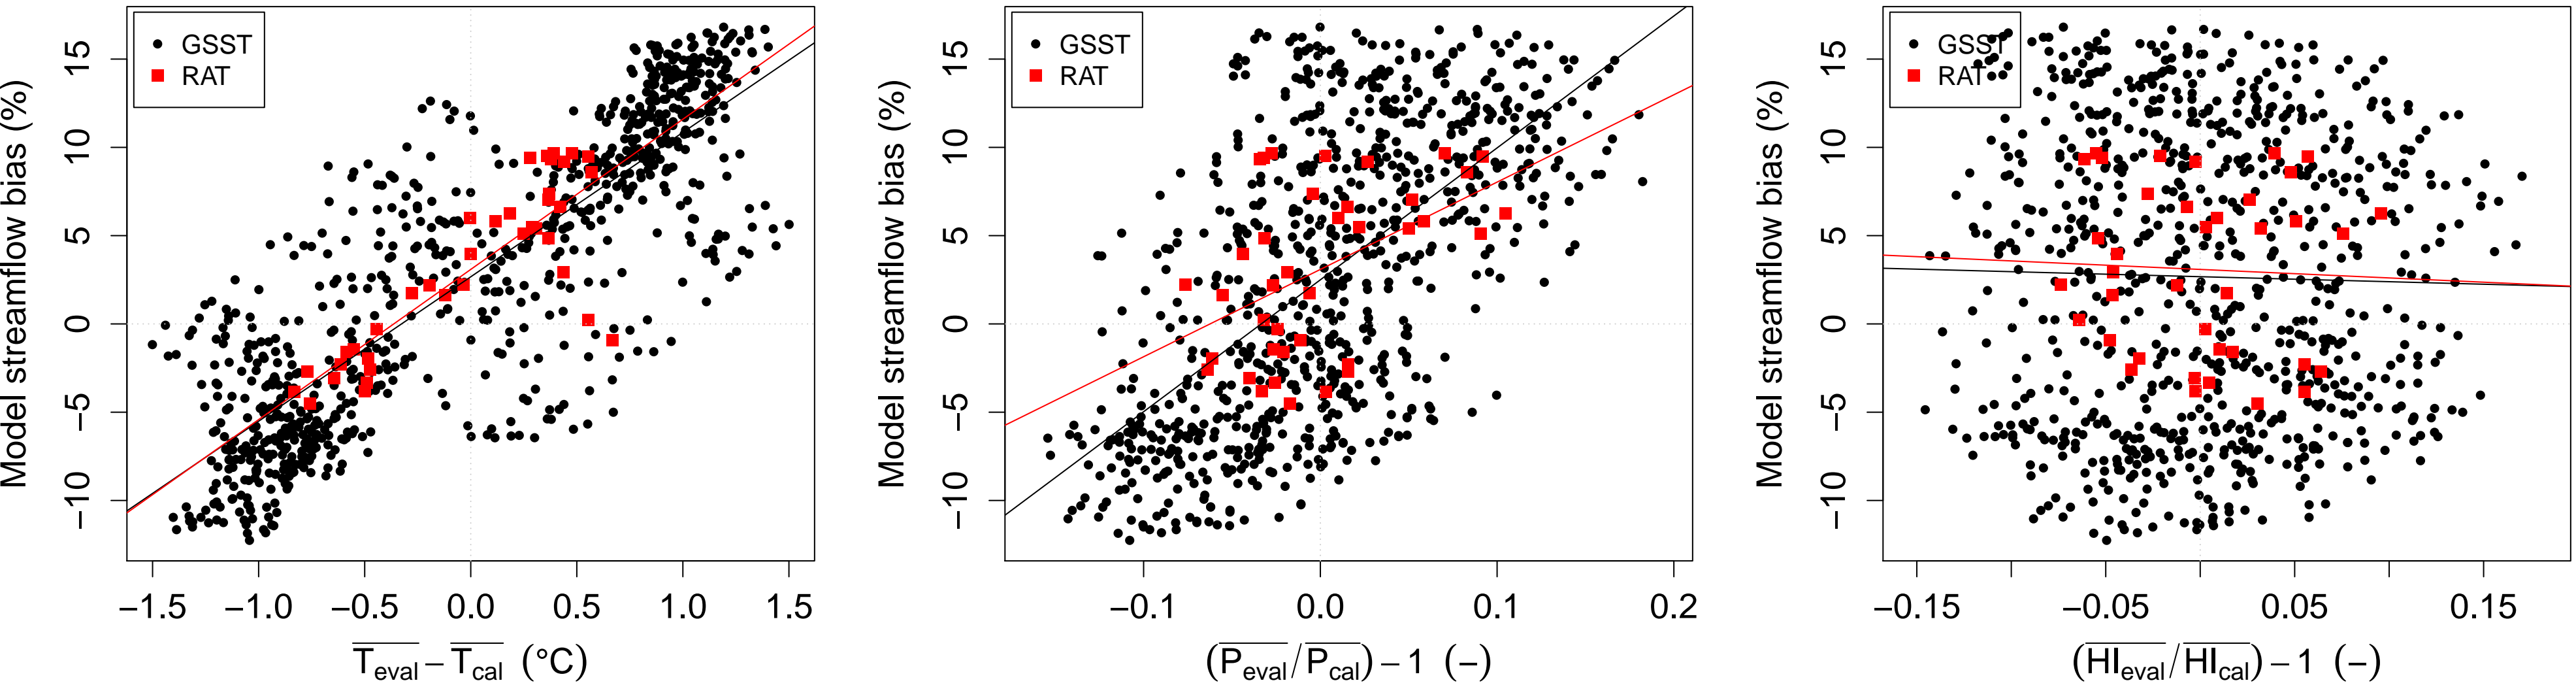

Figure 6. Streamflow bias obtained with the RAT (red squares) and the GSST (black dots), as a function of temperature, precipitation and humidity index anomalies, for the catchment H8212010

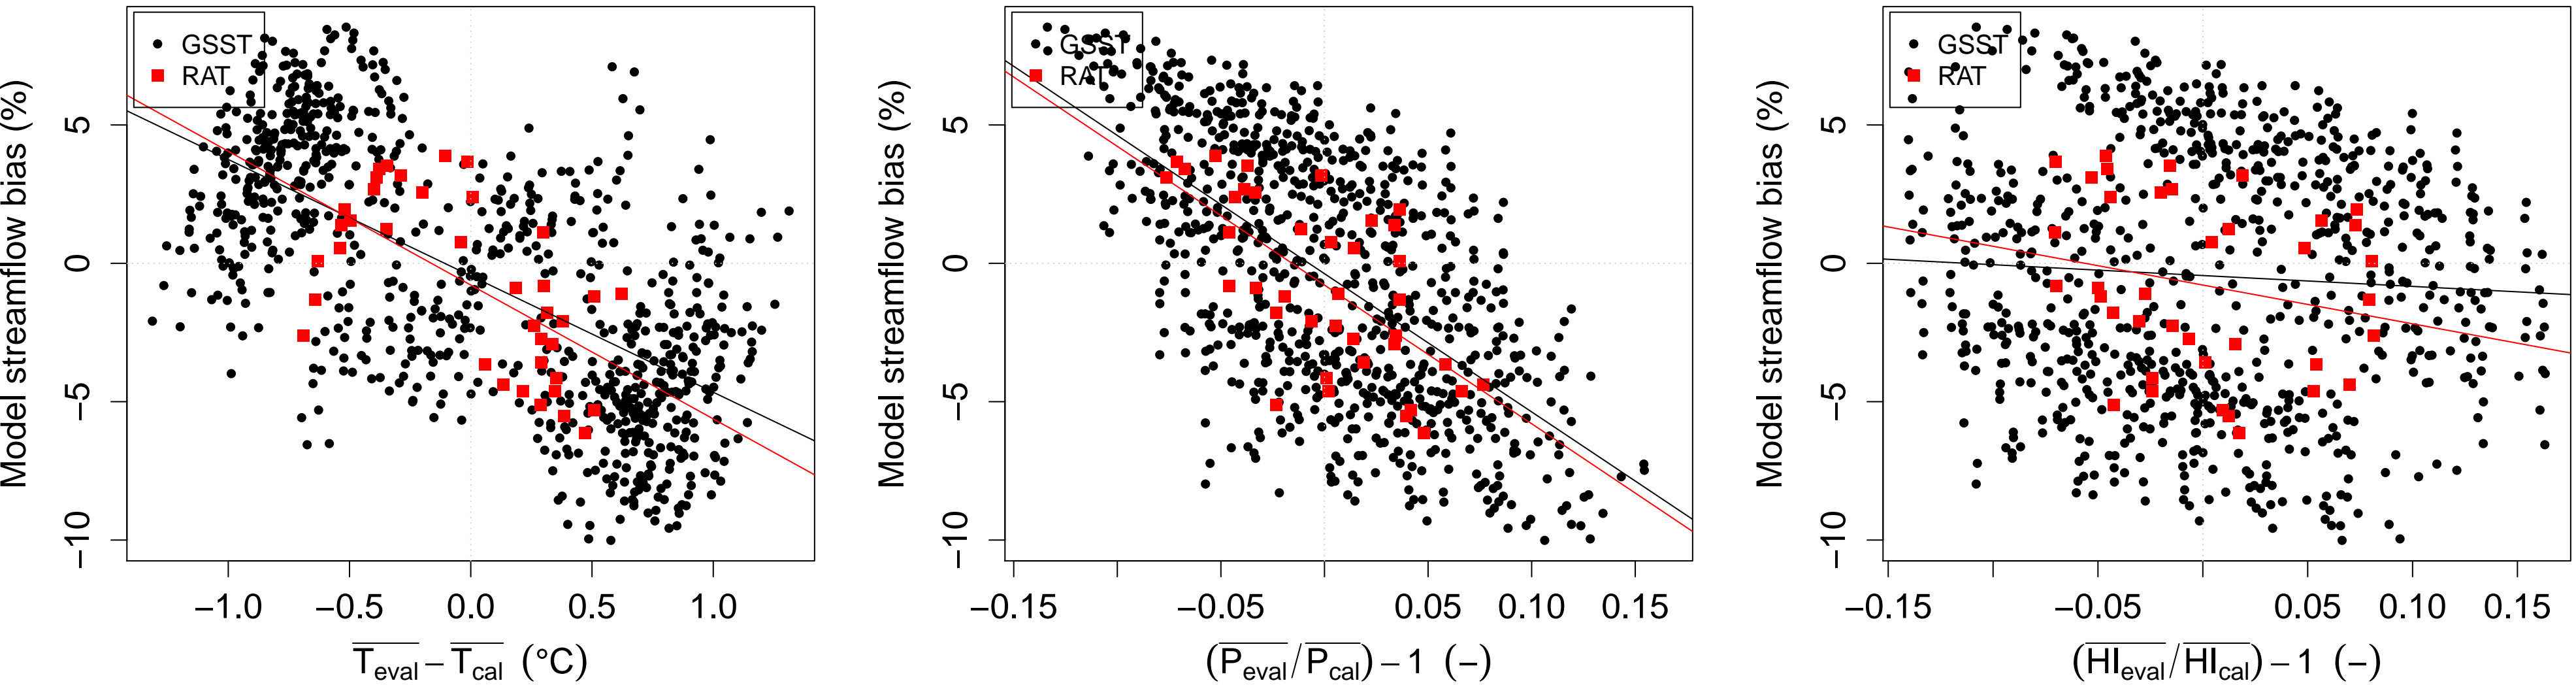

Figure 7. Streamflow bias obtained with the RAT (red squares) and the GSST (black dots), as a function of temperature, precipitation and humidity index anomalies, for the catchment I5221010



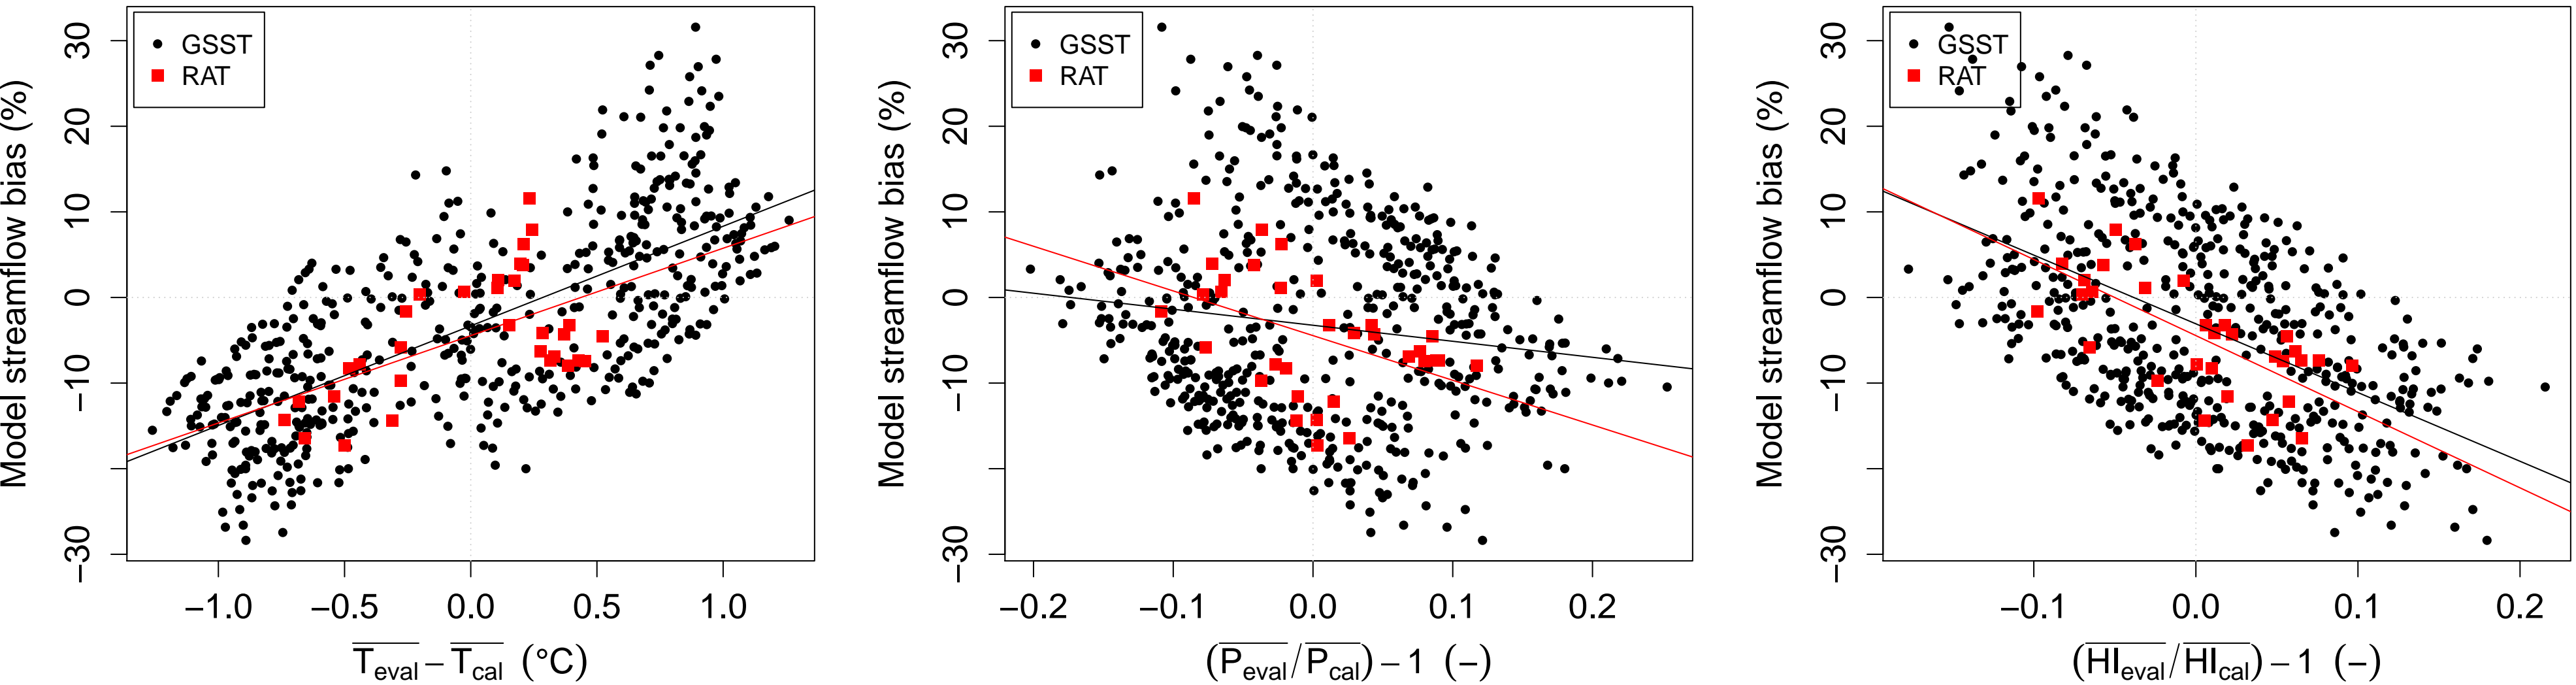

Figure 8. Streamflow bias obtained with the RAT (red squares) and the GSST (black dots), as a function of temperature, precipitation and humidity index anomalies, for the catchment J7483010

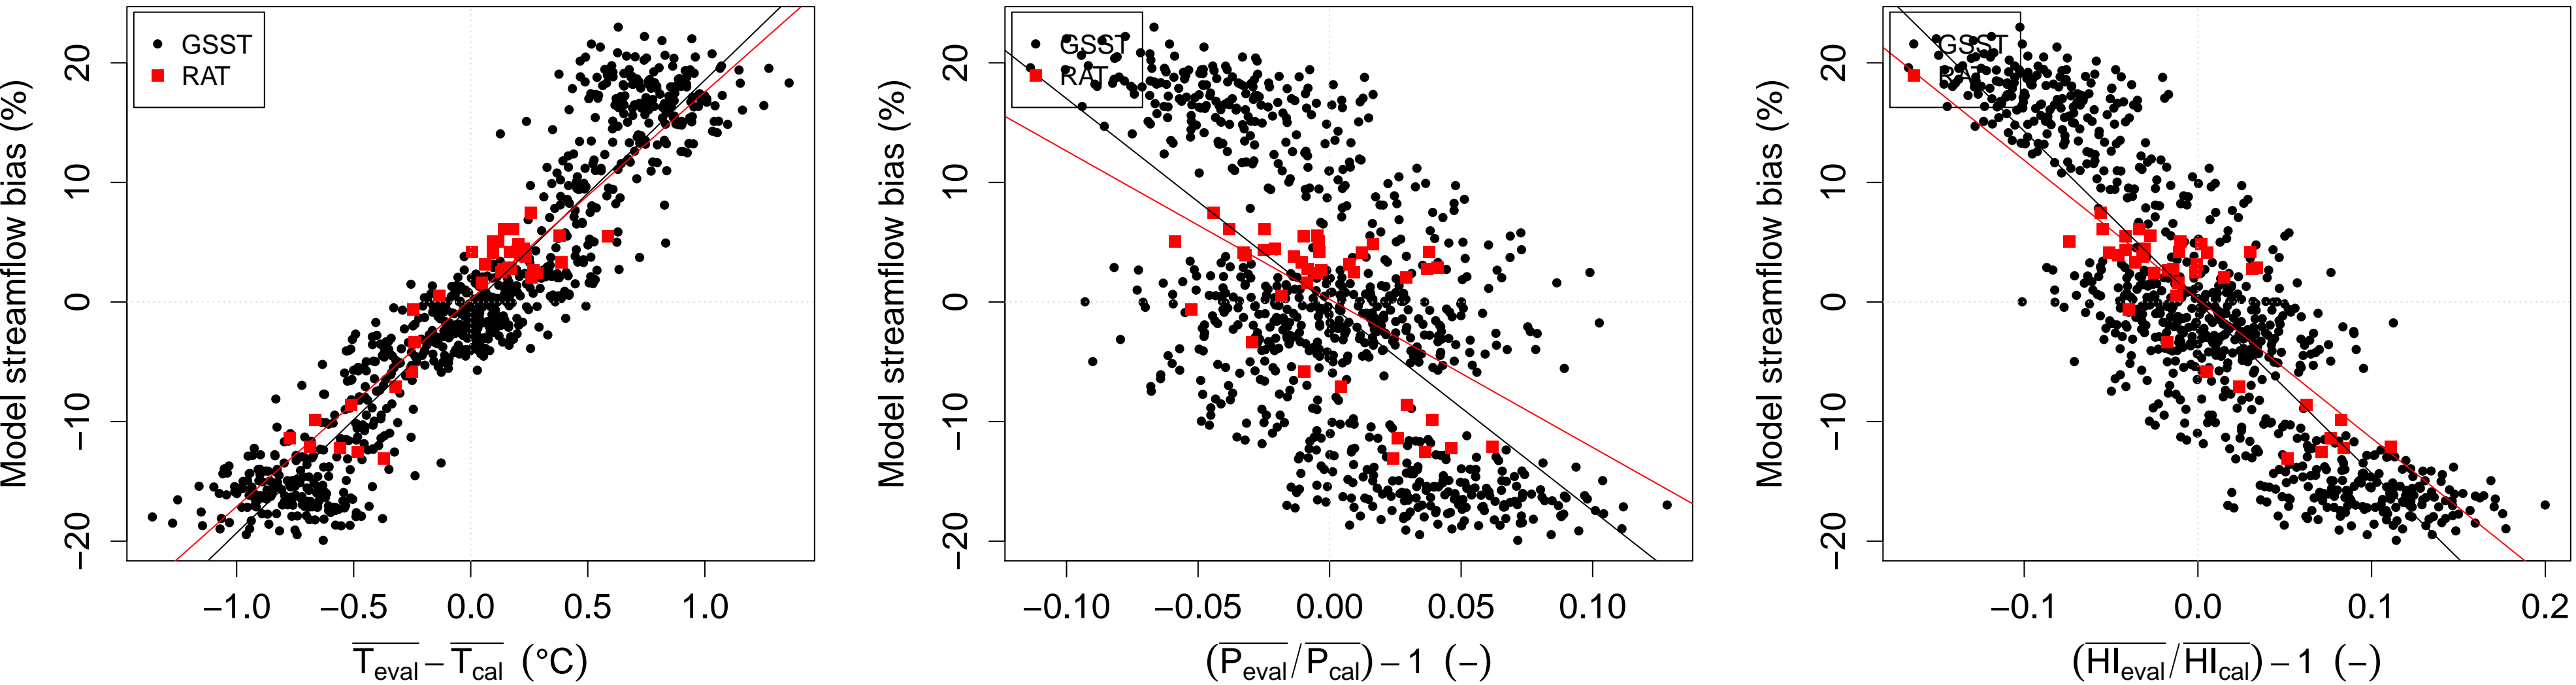

Figure 9. Streamflow bias obtained with the RAT (red squares) and the GSST (black dots), as a function of temperature, precipitation and humidity index anomalies, for the catchment K1321810

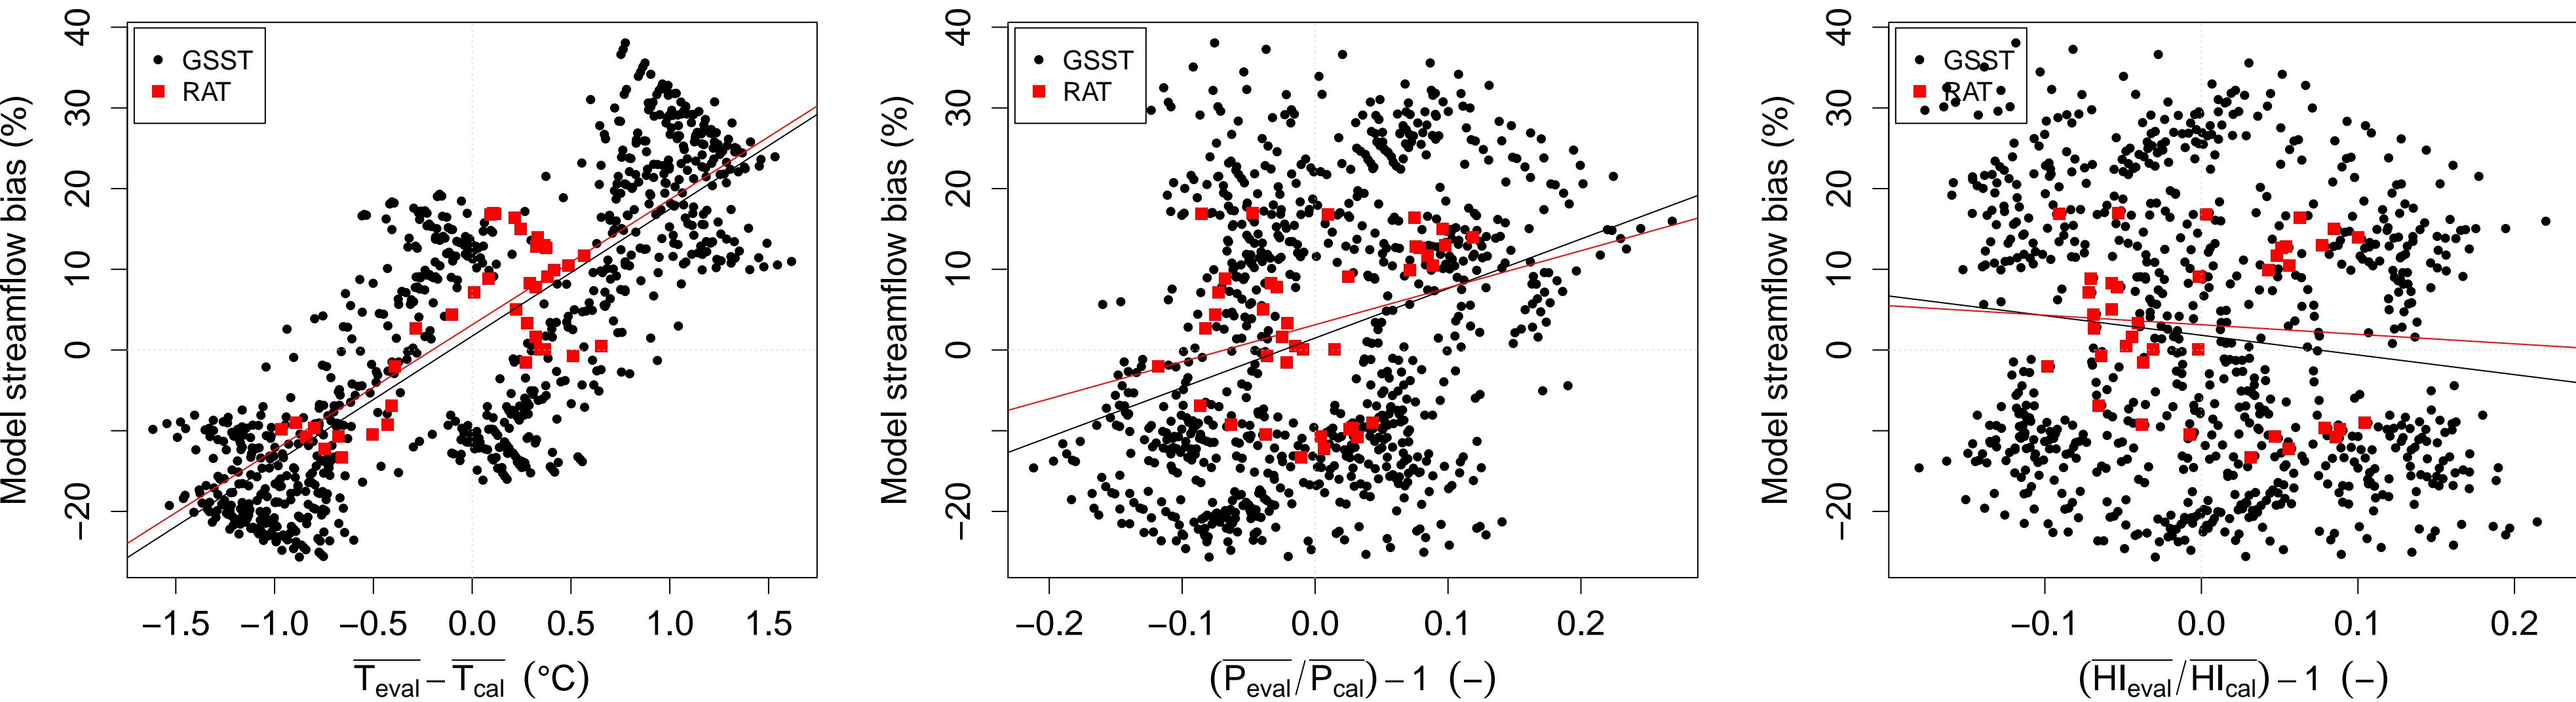

Figure 10. Streamflow bias obtained with the RAT (red squares) and the GSST (black dots), as a function of temperature, precipitation and humidity index anomalies, for the catchment K6402520

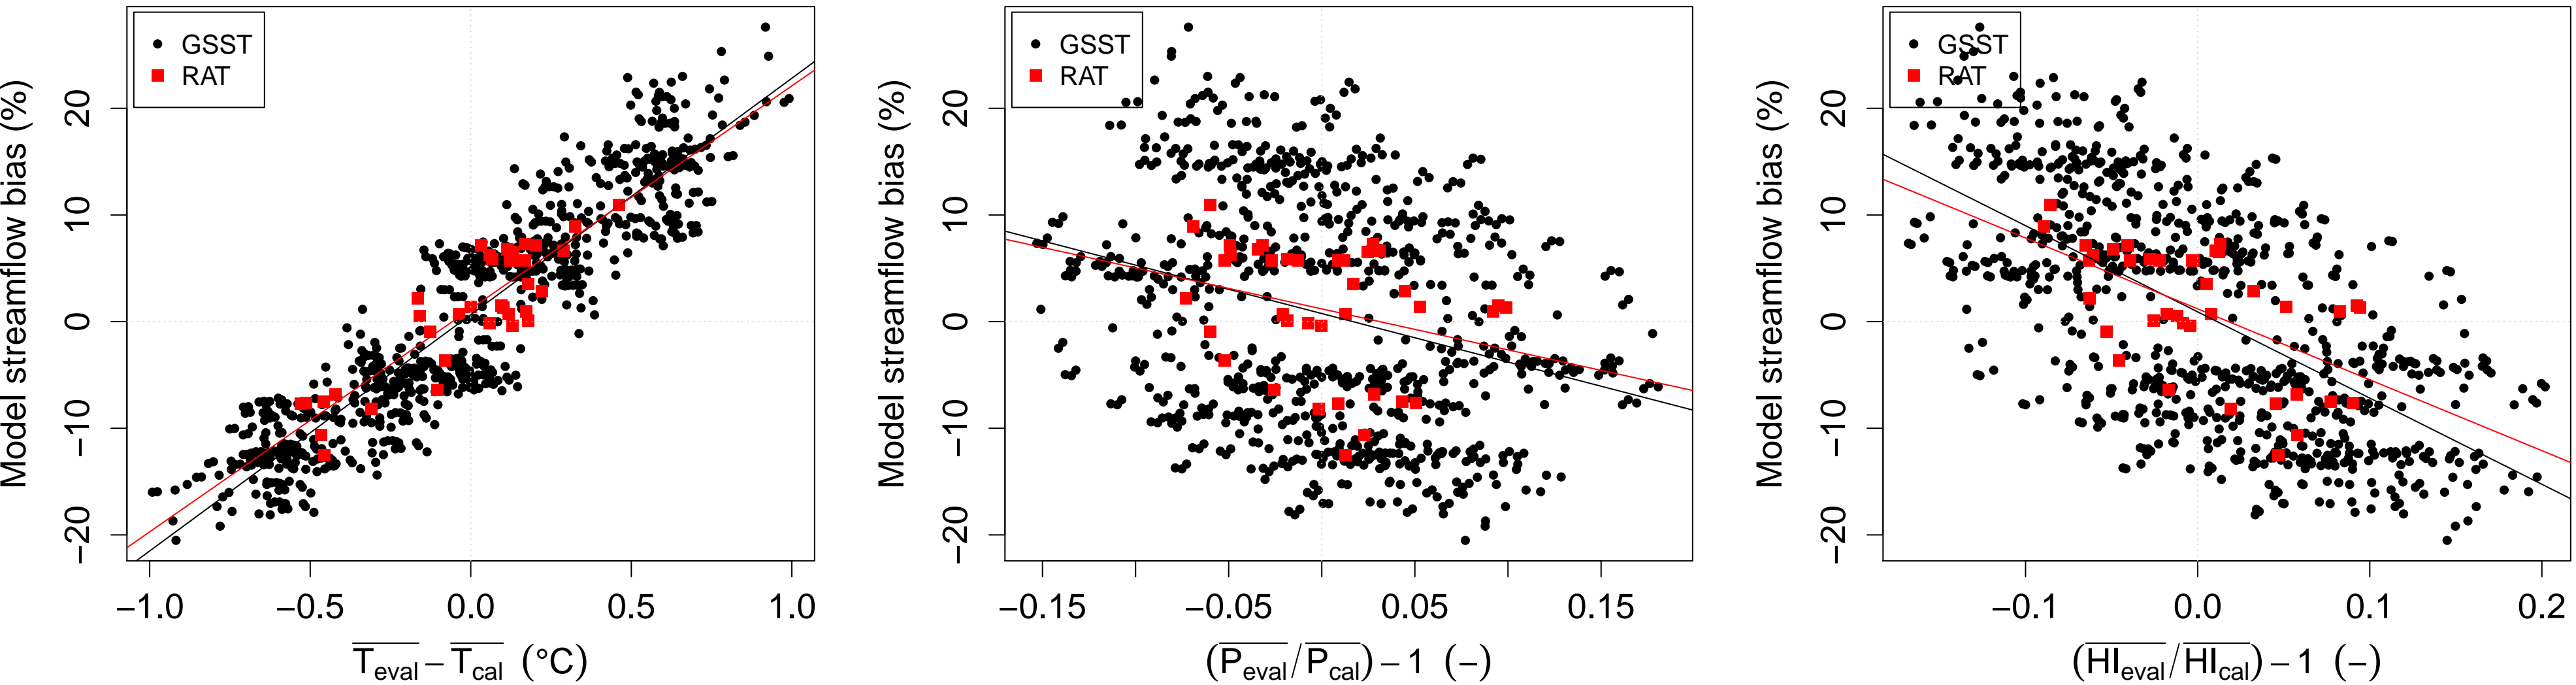

Figure 11. Streamflow bias obtained with the RAT (red squares) and the GSST (black dots), as a function of temperature, precipitation and humidity index anomalies, for the catchment L0563010

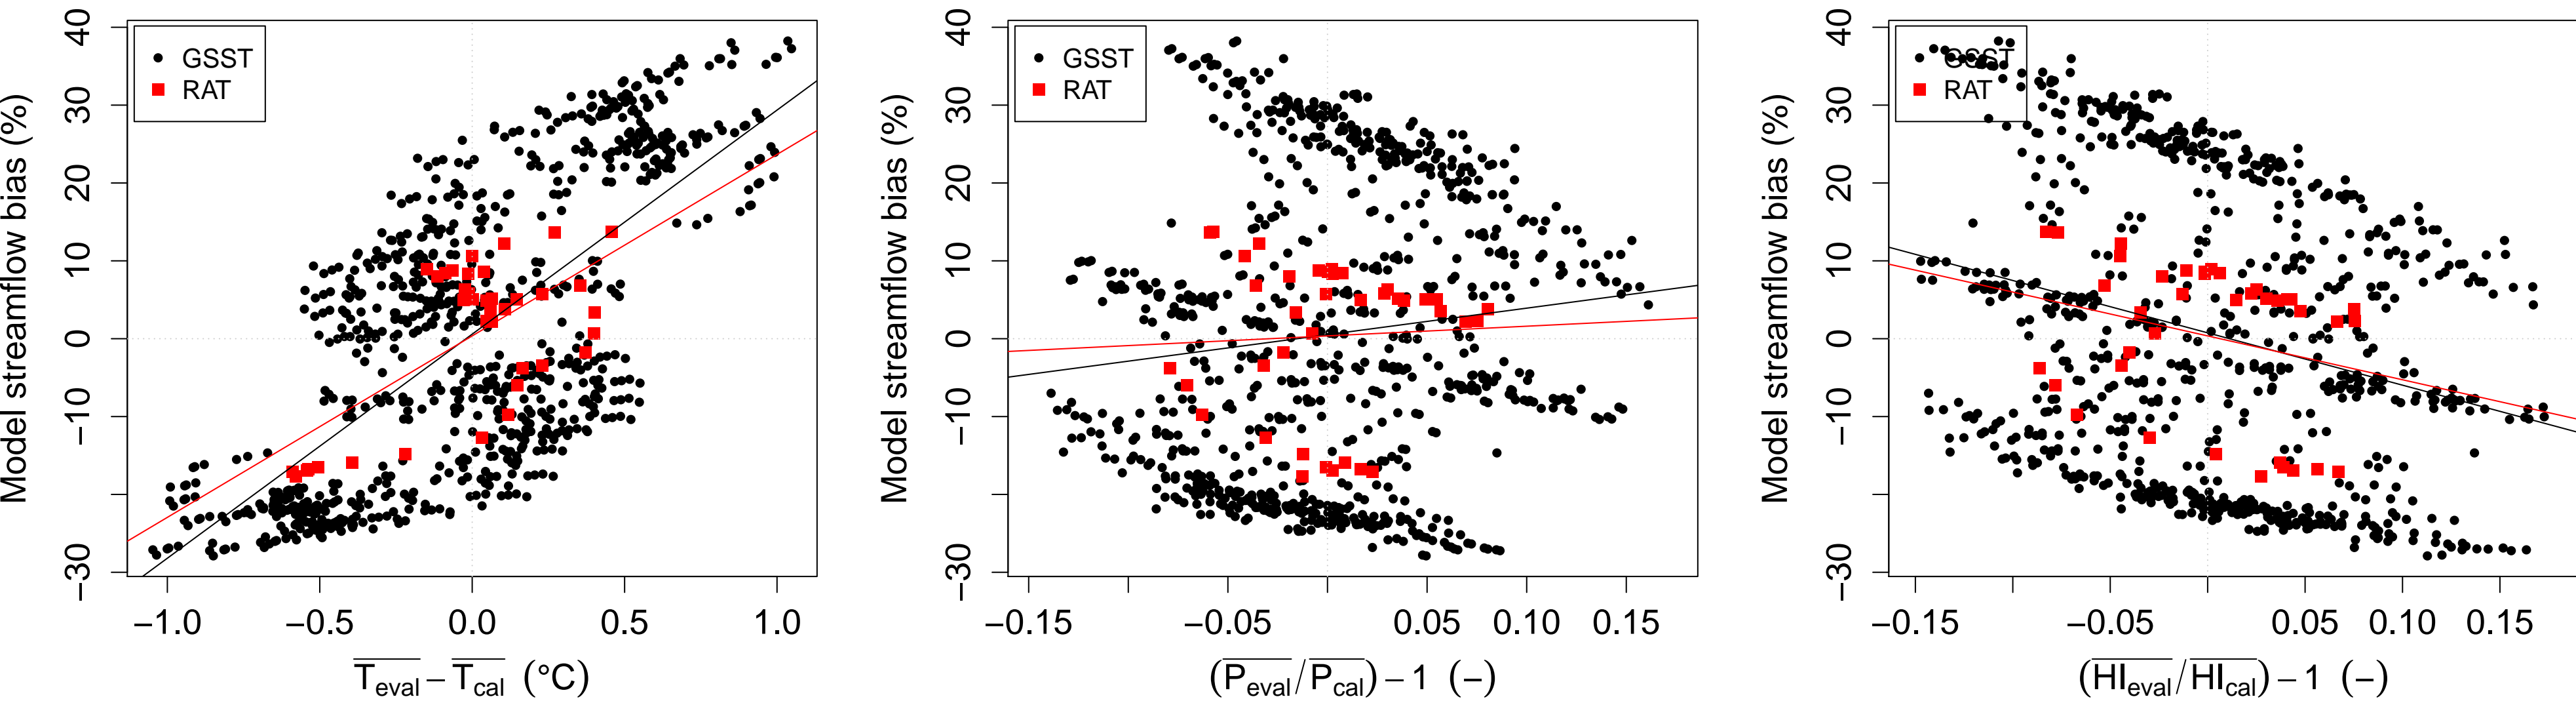

Figure 12. Streamflow bias obtained with the RAT (red squares) and the GSST (black dots), as a function of temperature, precipitation and humidity index anomalies, for the catchment L4411710

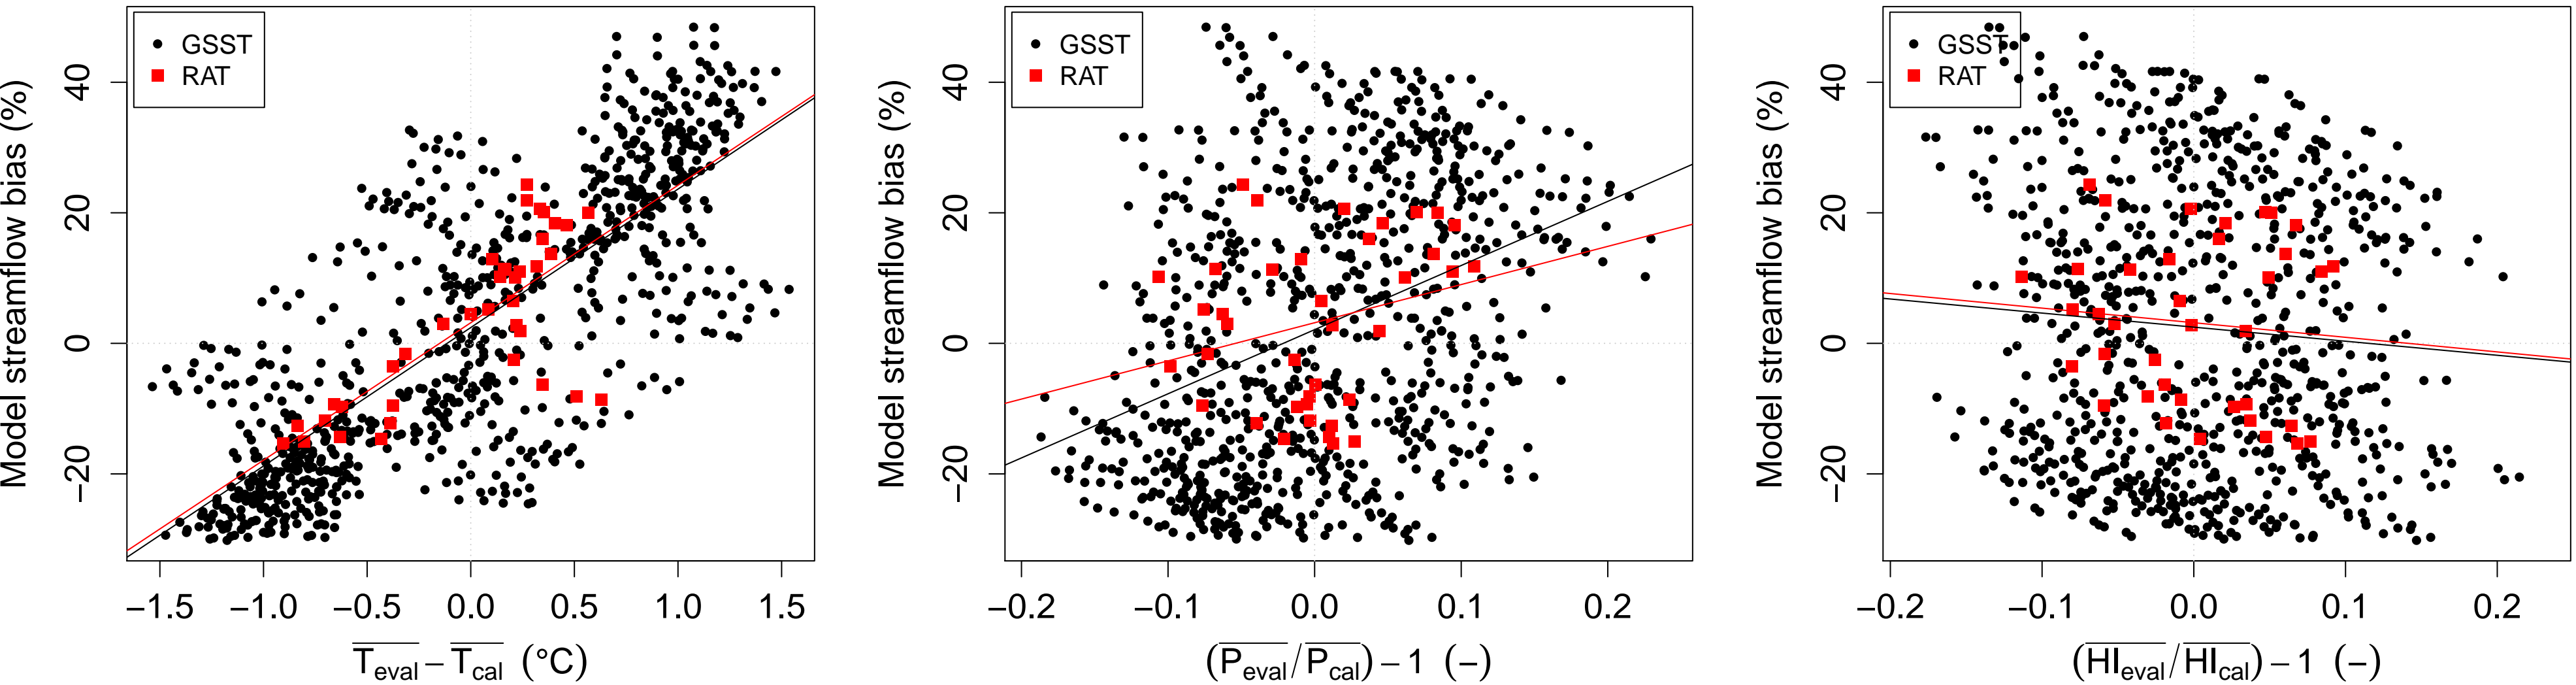

Figure 13. Streamflow bias obtained with the RAT (red squares) and the GSST (black dots), as a function of temperature, precipitation and humidity index anomalies, for the catchment M0243010

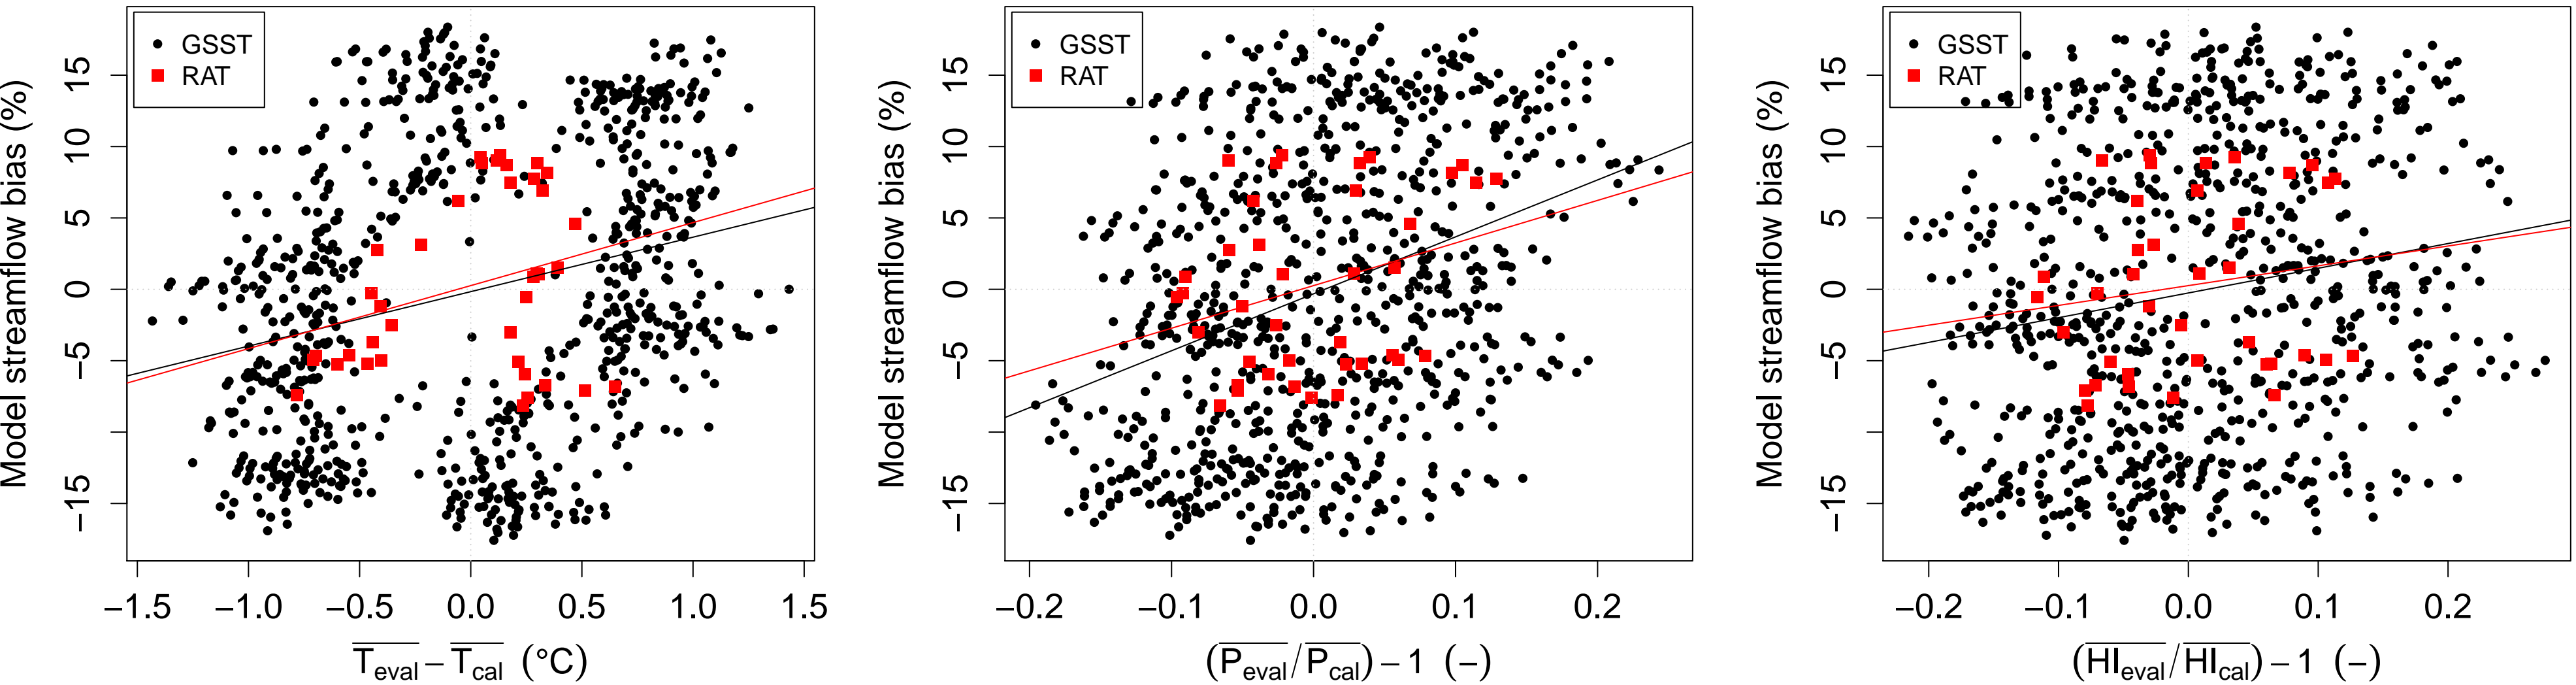

Figure 14. Streamflow bias obtained with the RAT (red squares) and the GSST (black dots), as a function of temperature, precipitation and humidity index anomalies, for the catchment M7112410

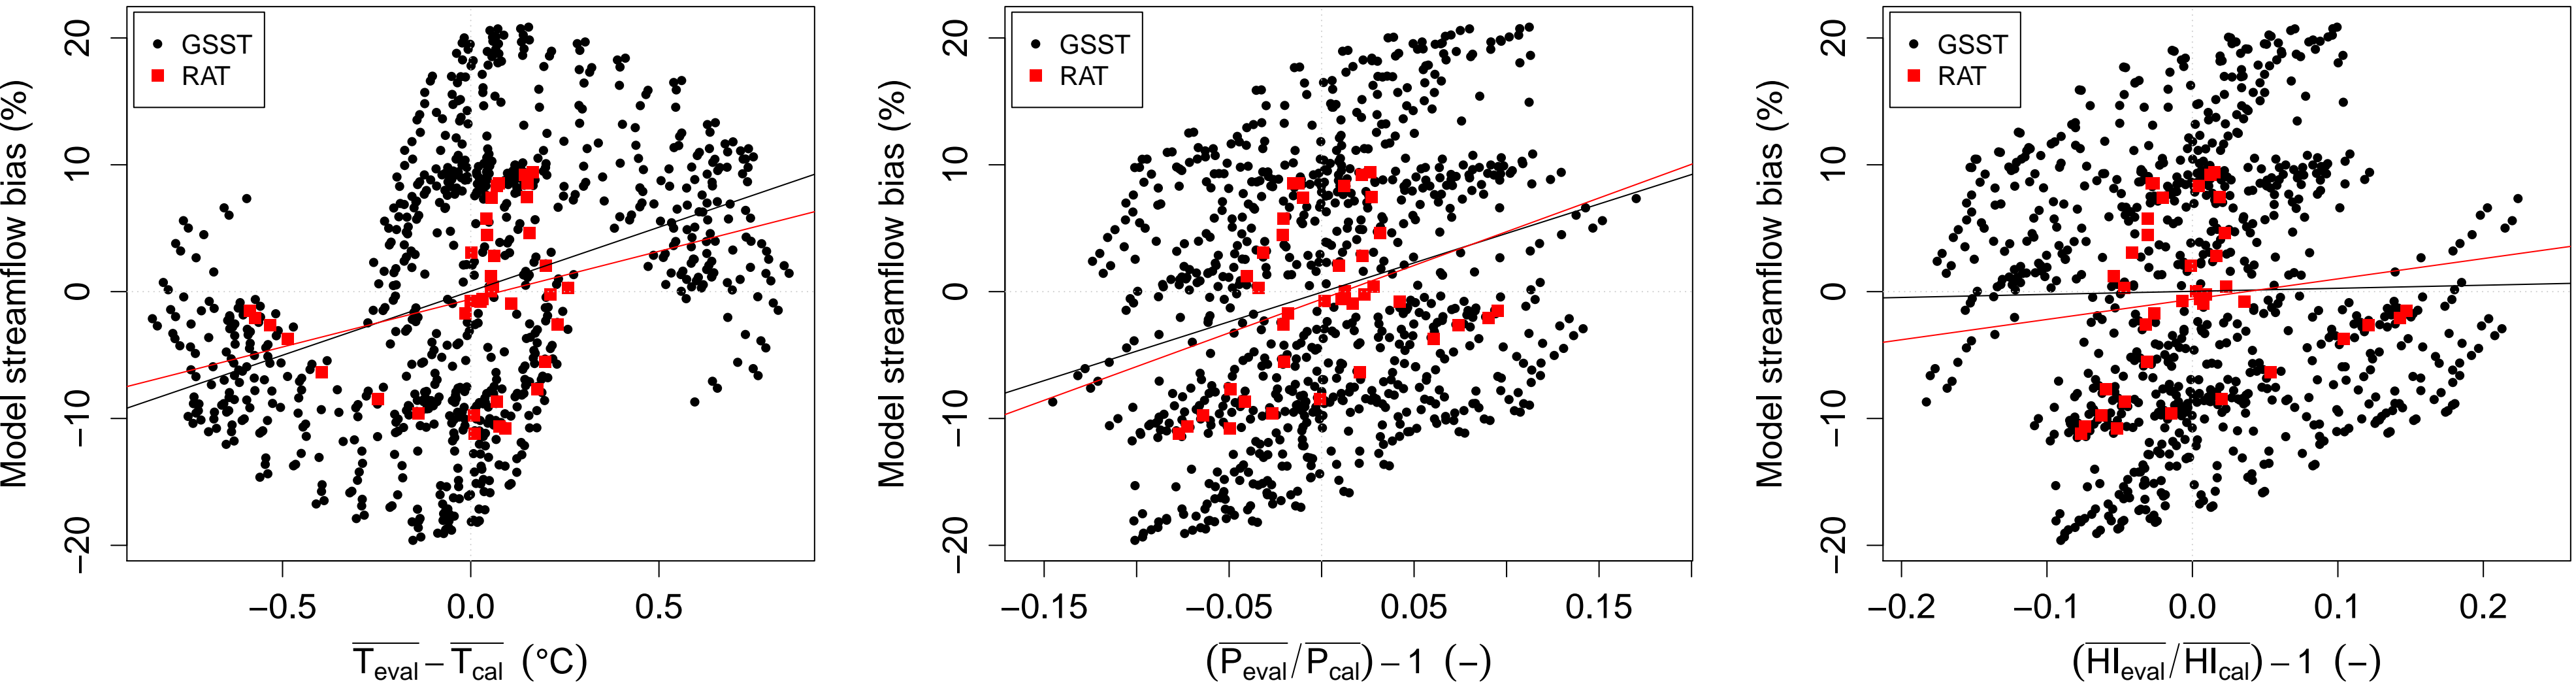

Figure 15. Streamflow bias obtained with the RAT (red squares) and the GSST (black dots), as a function of temperature, precipitation and humidity index anomalies, for the catchment O0592510



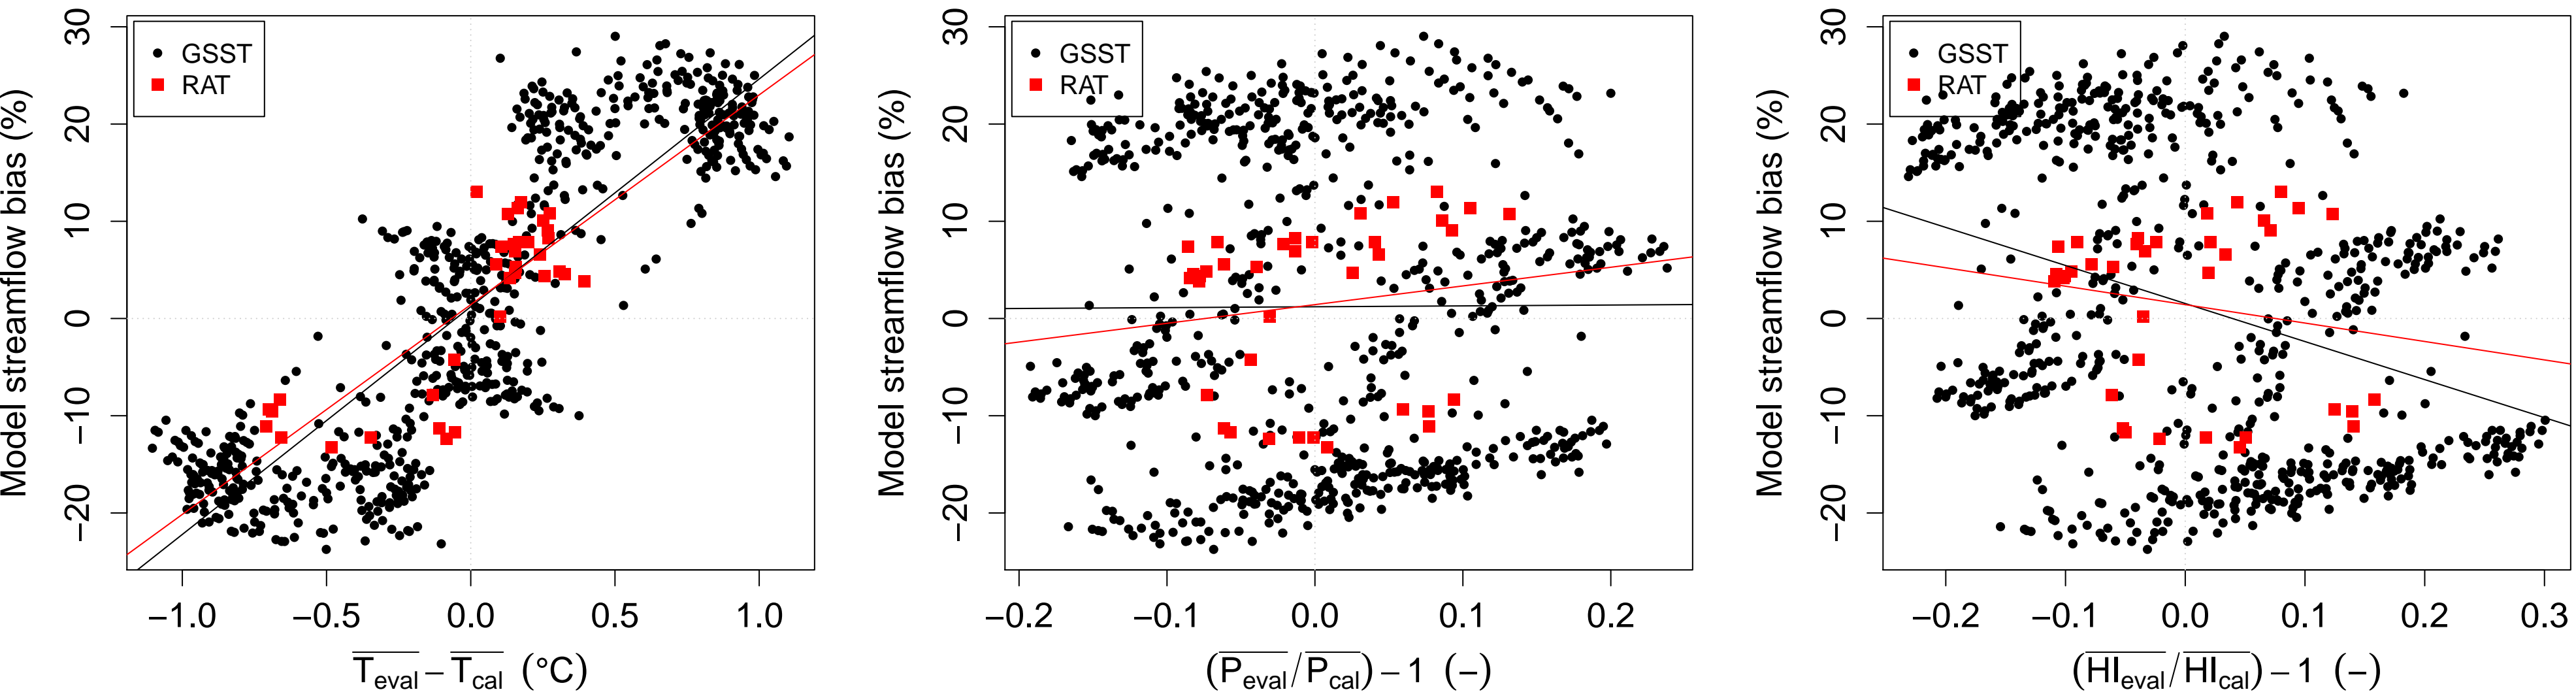

Figure 16. Streamflow bias obtained with the RAT (red squares) and the GSST (black dots), as a function of temperature, precipitation and humidity index anomalies, for the catchment O7101510

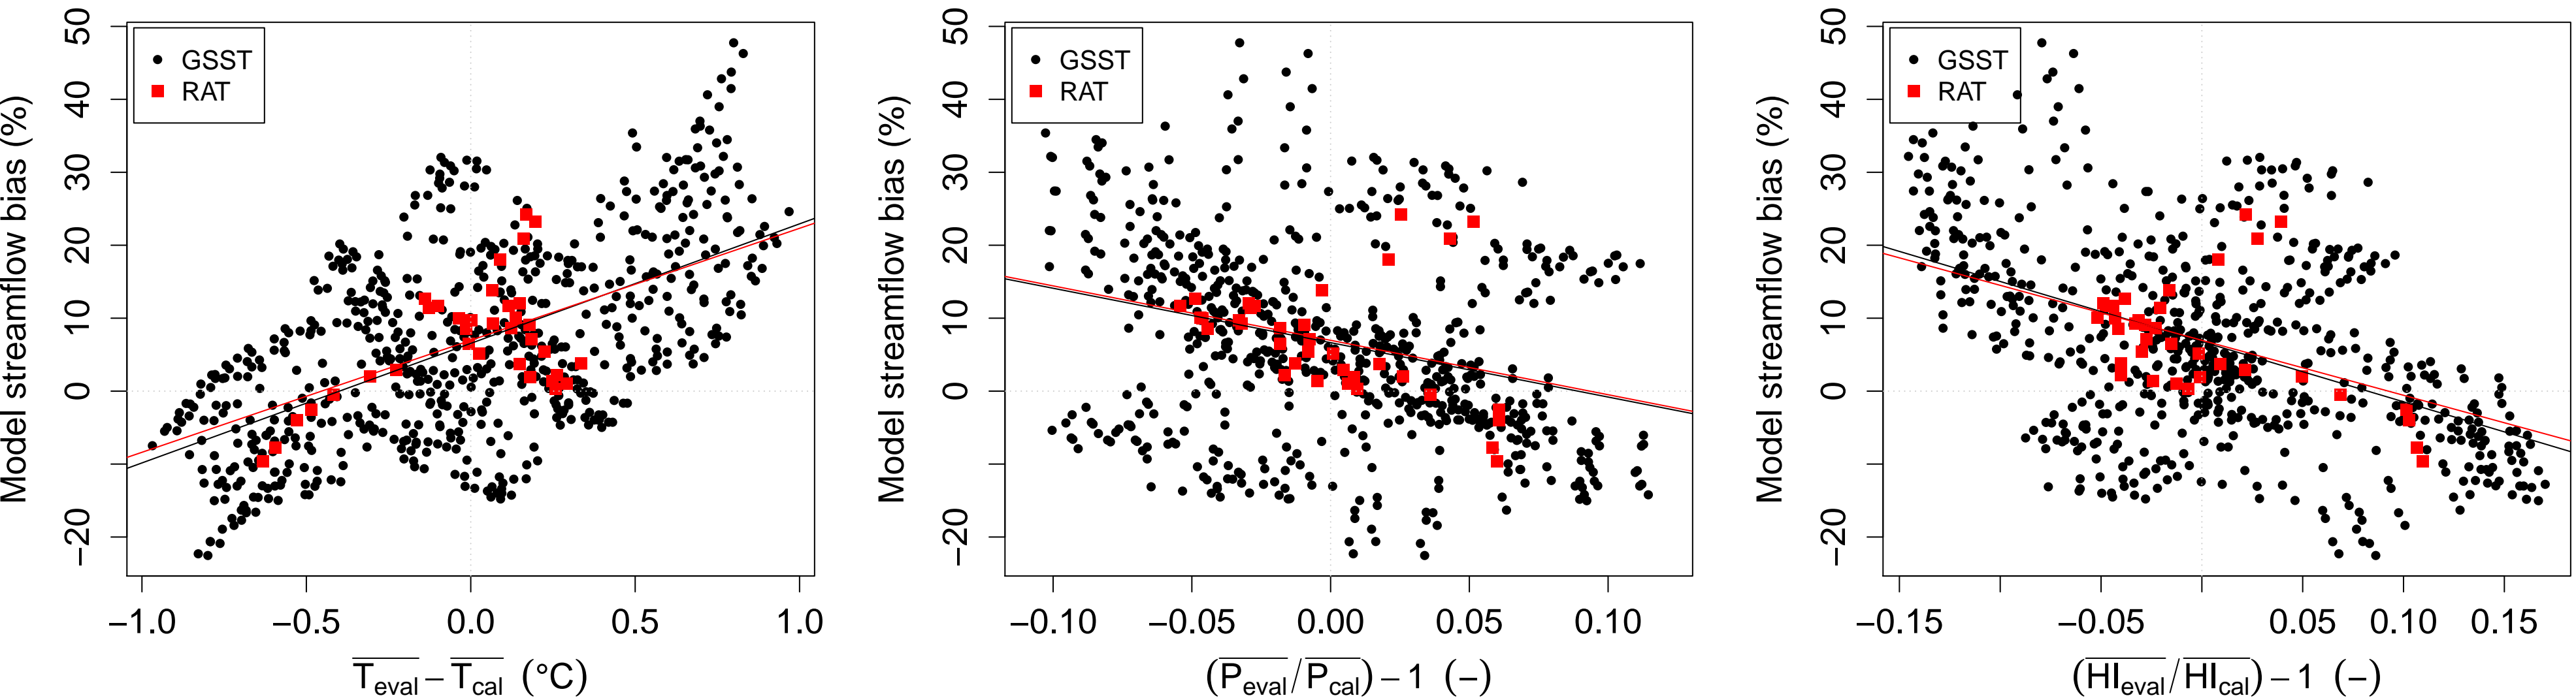

Figure 17. Streamflow bias obtained with the RAT (red squares) and the GSST (black dots), as a function of temperature, precipitation and humidity index anomalies, for the catchment Q5501010

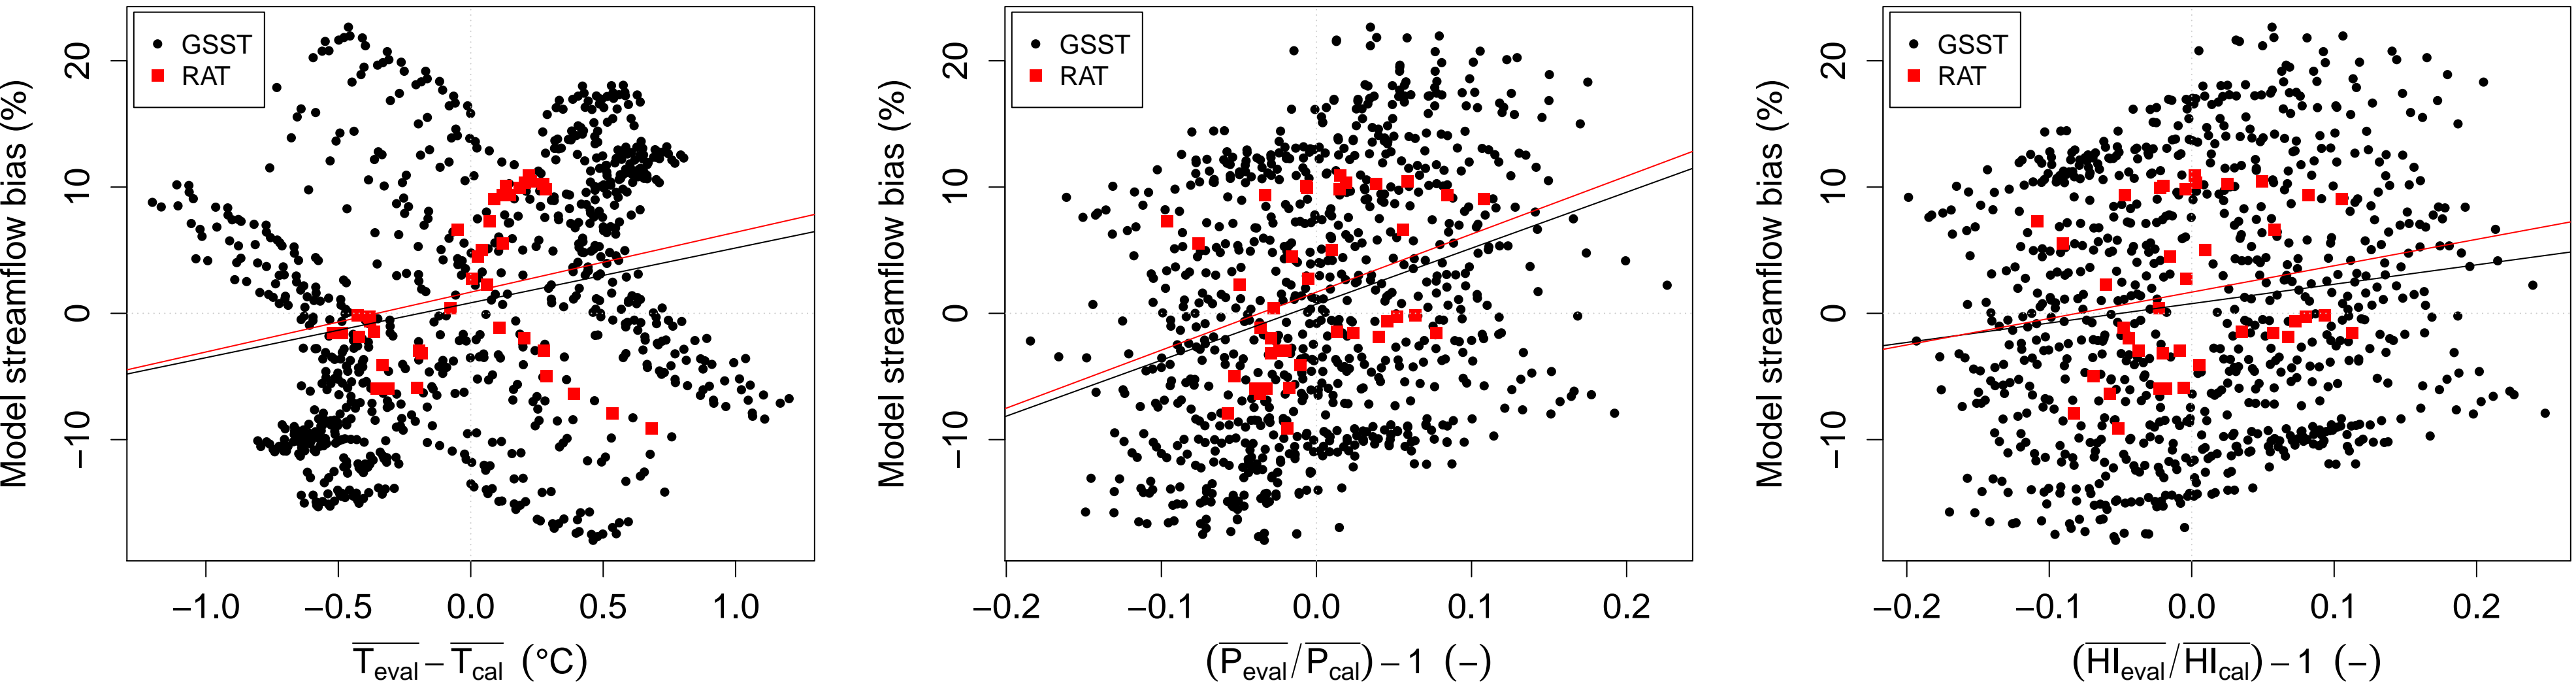

Figure 18. Streamflow bias obtained with the RAT (red squares) and the GSST (black dots), as a function of temperature, precipitation and humidity index anomalies, for the catchment S2242510

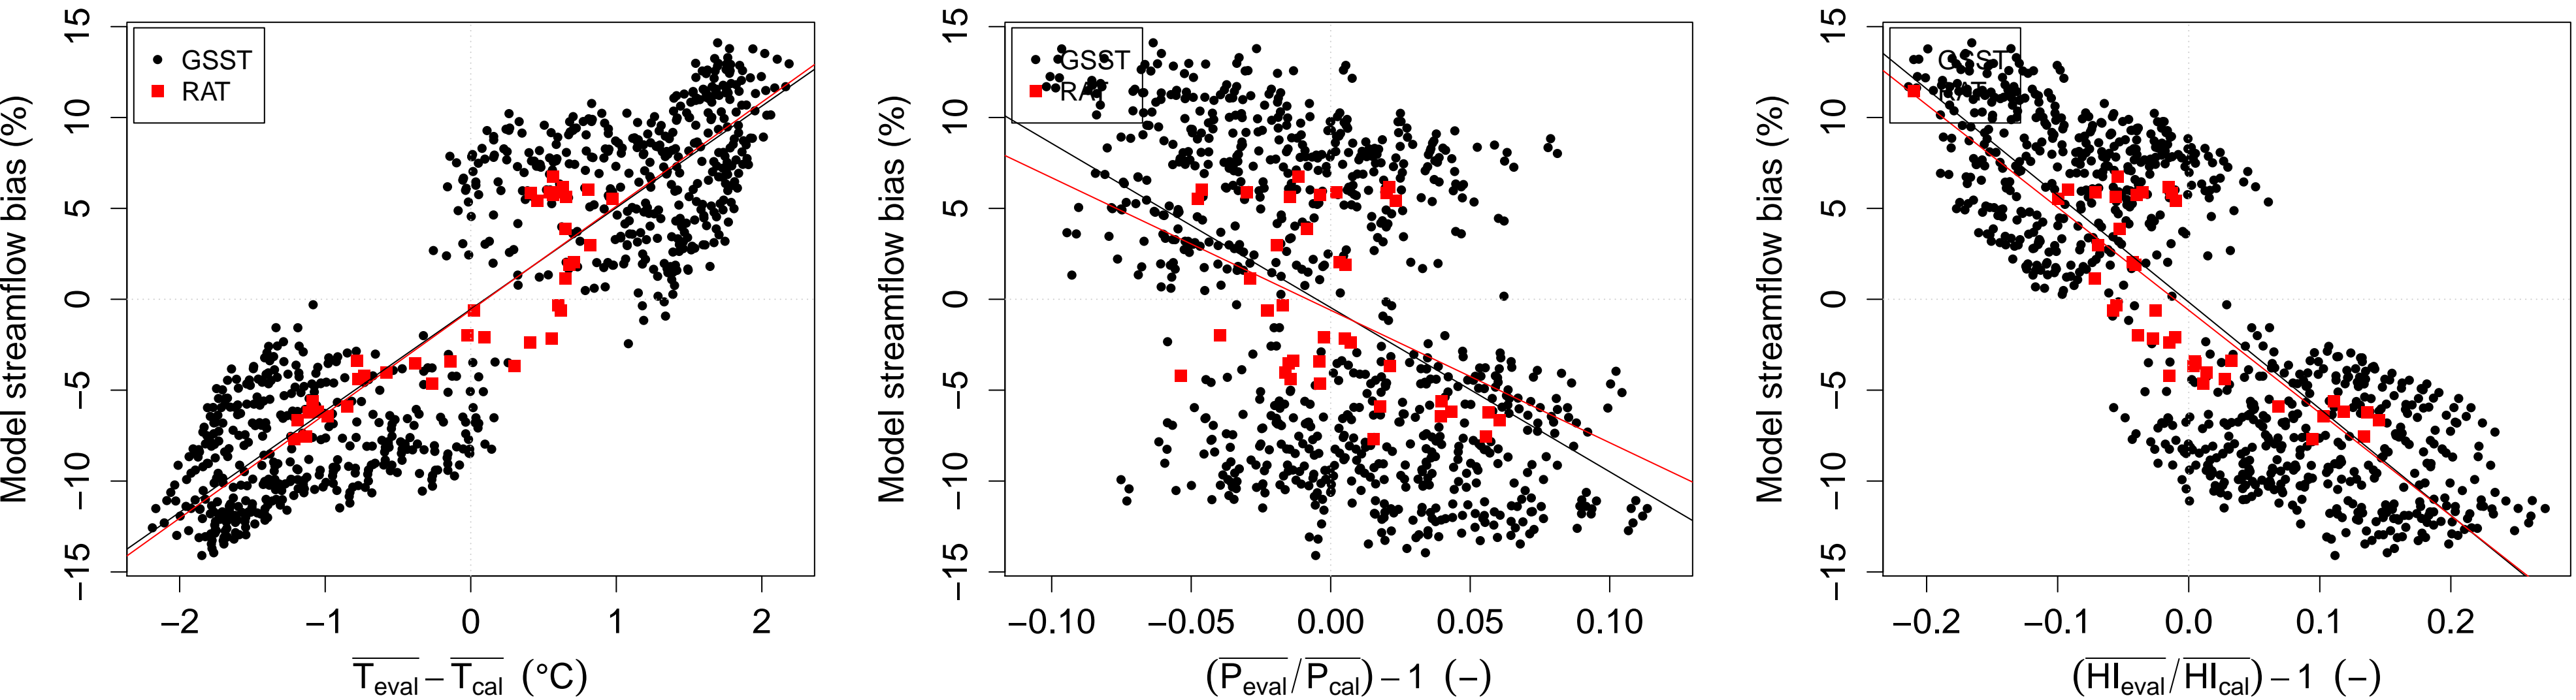

Figure 19. Streamflow bias obtained with the RAT (red squares) and the GSST (black dots), as a function of temperature, precipitation and humidity index anomalies, for the catchment U4644010

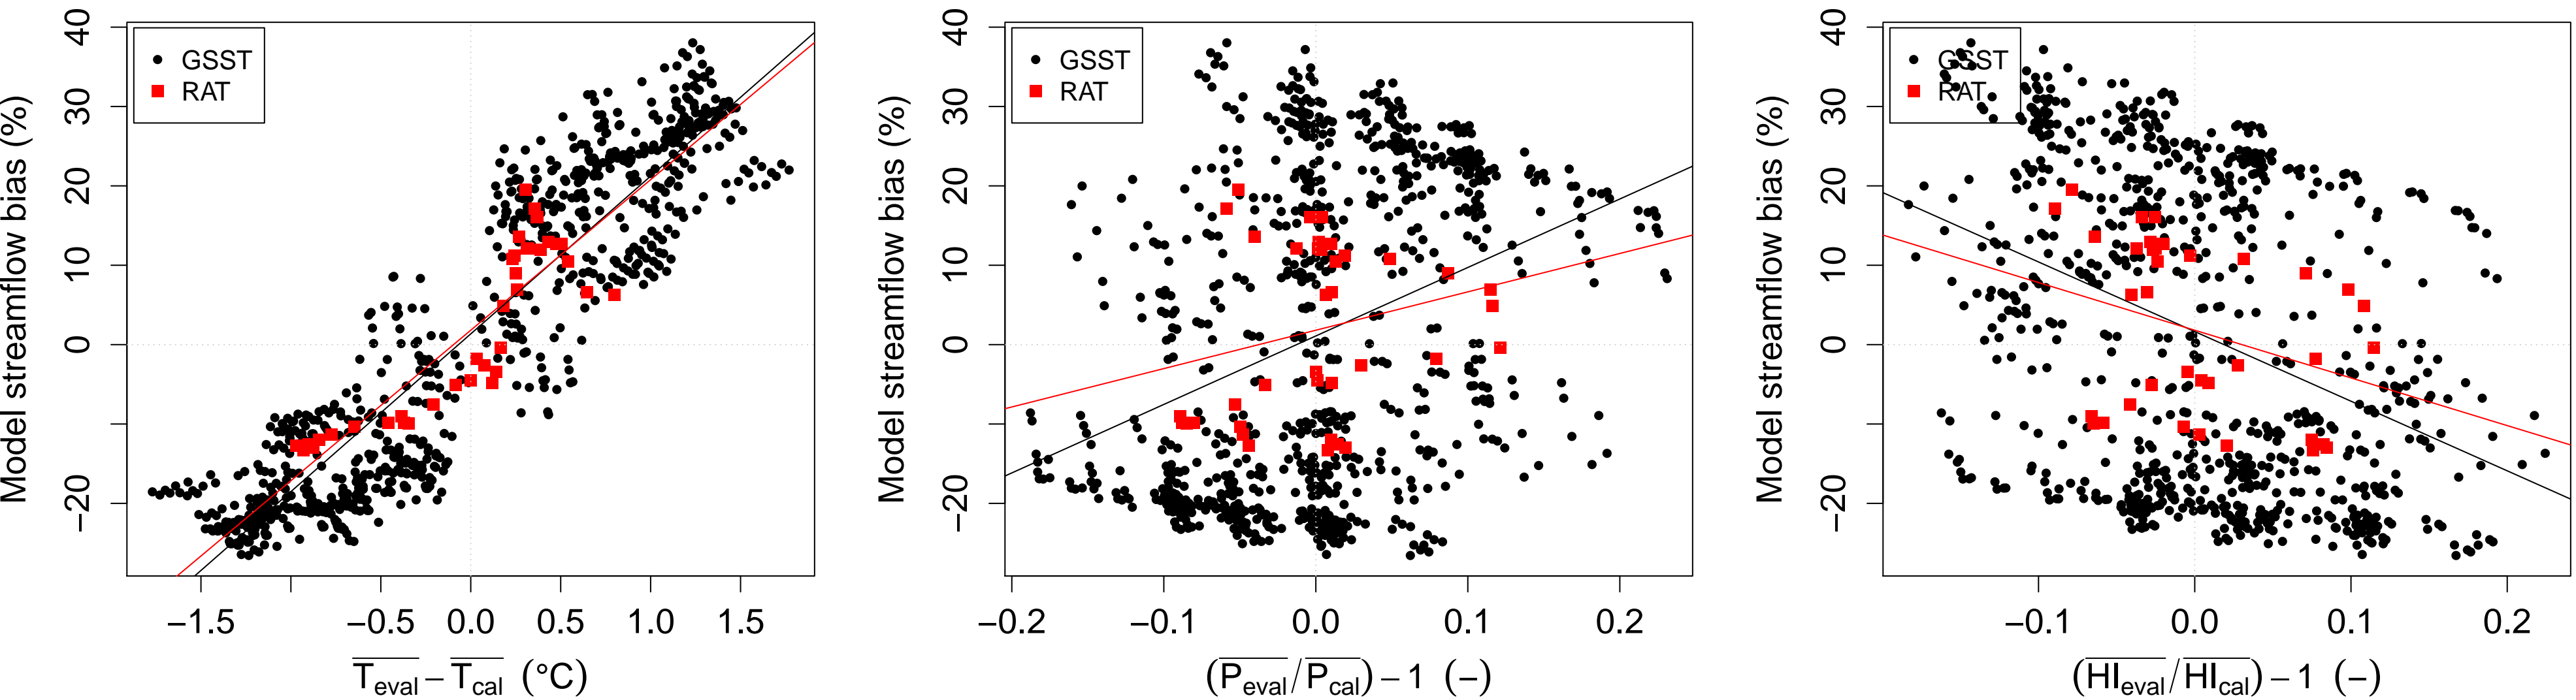

Figure 20. Streamflow bias obtained with the RAT (red squares) and the GSST (black dots), as a function of temperature, precipitation and humidity index anomalies, for the catchment V4264010

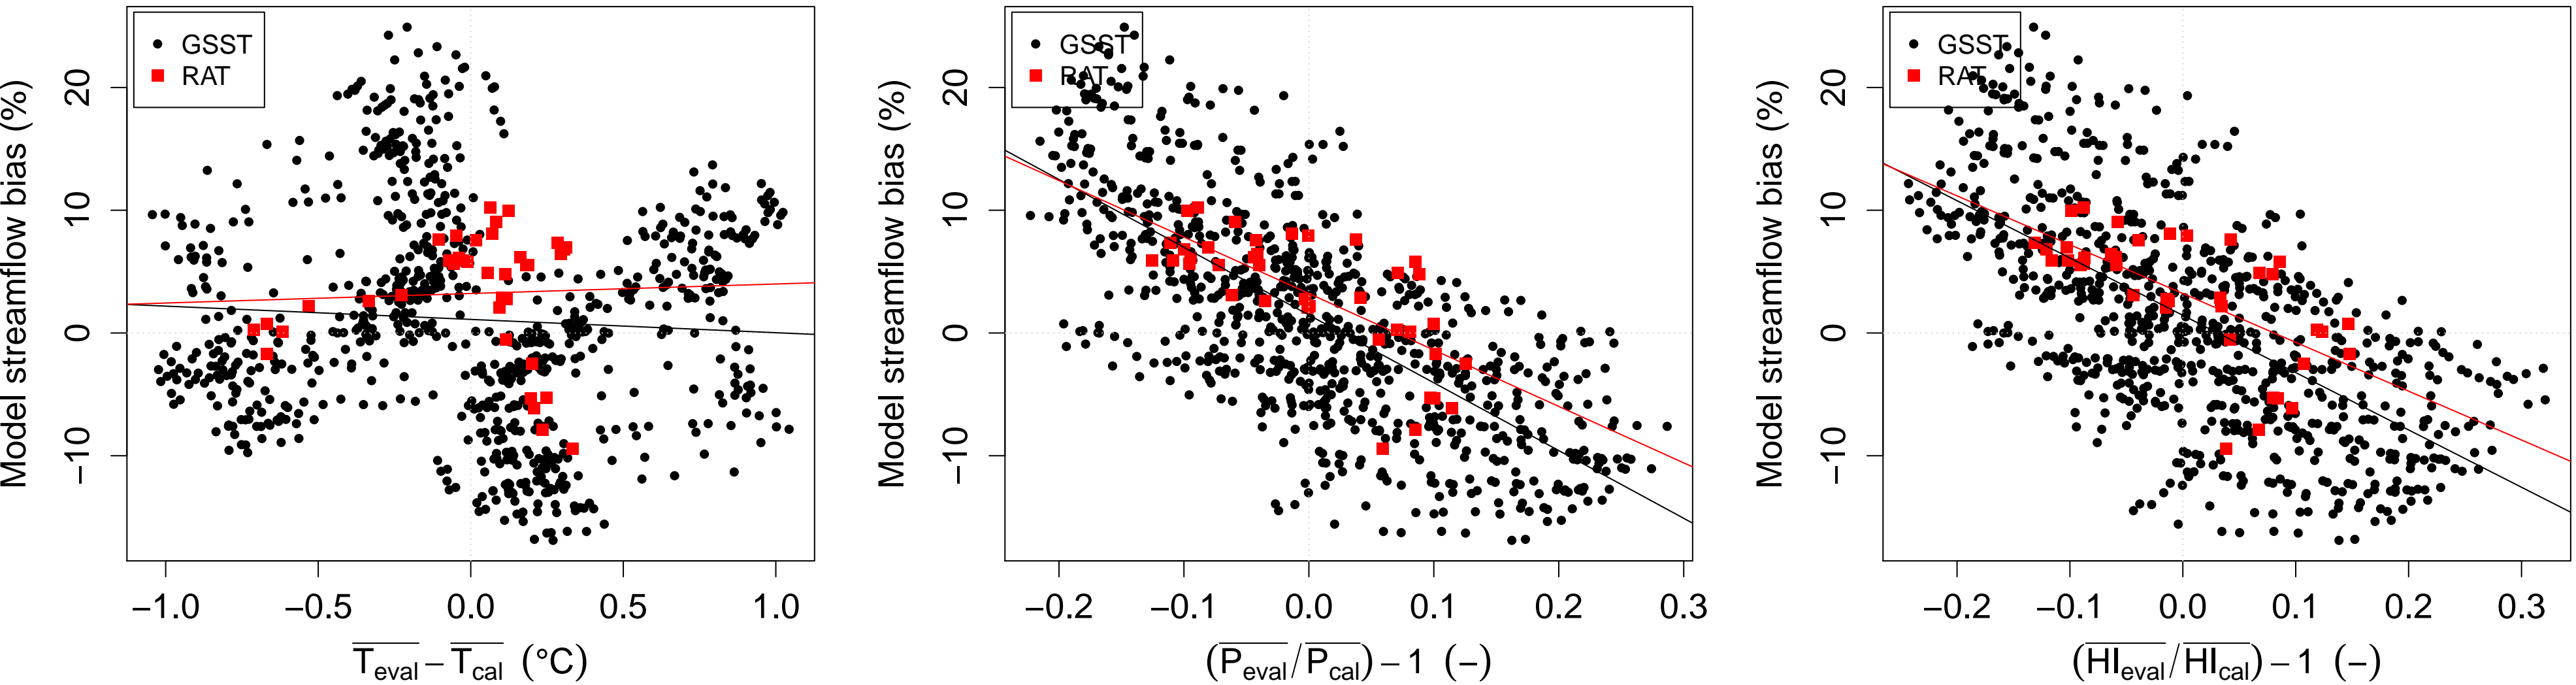

Figure 21. Streamflow bias obtained with the RAT (red squares) and the GSST (black dots), as a function of temperature, precipitation and humidity index anomalies, for the catchment Y4624010

## **Technical Note – RAT: a Robustness Assessment Test for calibrated and uncalibrated hydrological models**

Pierre Nicolle<sup>1,3</sup>, Vazken Andréassian<sup>1,\*</sup>, Paul Royer-Gaspard<sup>1</sup>, Charles Perrin<sup>1</sup>, Guillaume Thirel<sup>1</sup>, Laurent Coron<sup>2</sup>, Léonard Santos<sup>1</sup>

<sup>1</sup>Université Paris-Saclay, INRAE, UR HYCAR, 92160, Antony, France

<sup>2</sup>EDF, DTG, Toulouse, France

<sup>3</sup>now at Université Gustave Eiffel, Nantes, France

\*Corresponding author: Vazken Andréassian ([vazken.andreassian@inrae.fr](mailto:vazken.andreassian@inrae.fr))

**Supplementary Material 2: Plots showing streamflow annual bias obtained with the RAT function of (i) time, (ii) temperature anomalies (iii) precipitation anomalies (iv) humidity index anomalies, for all test catchments**

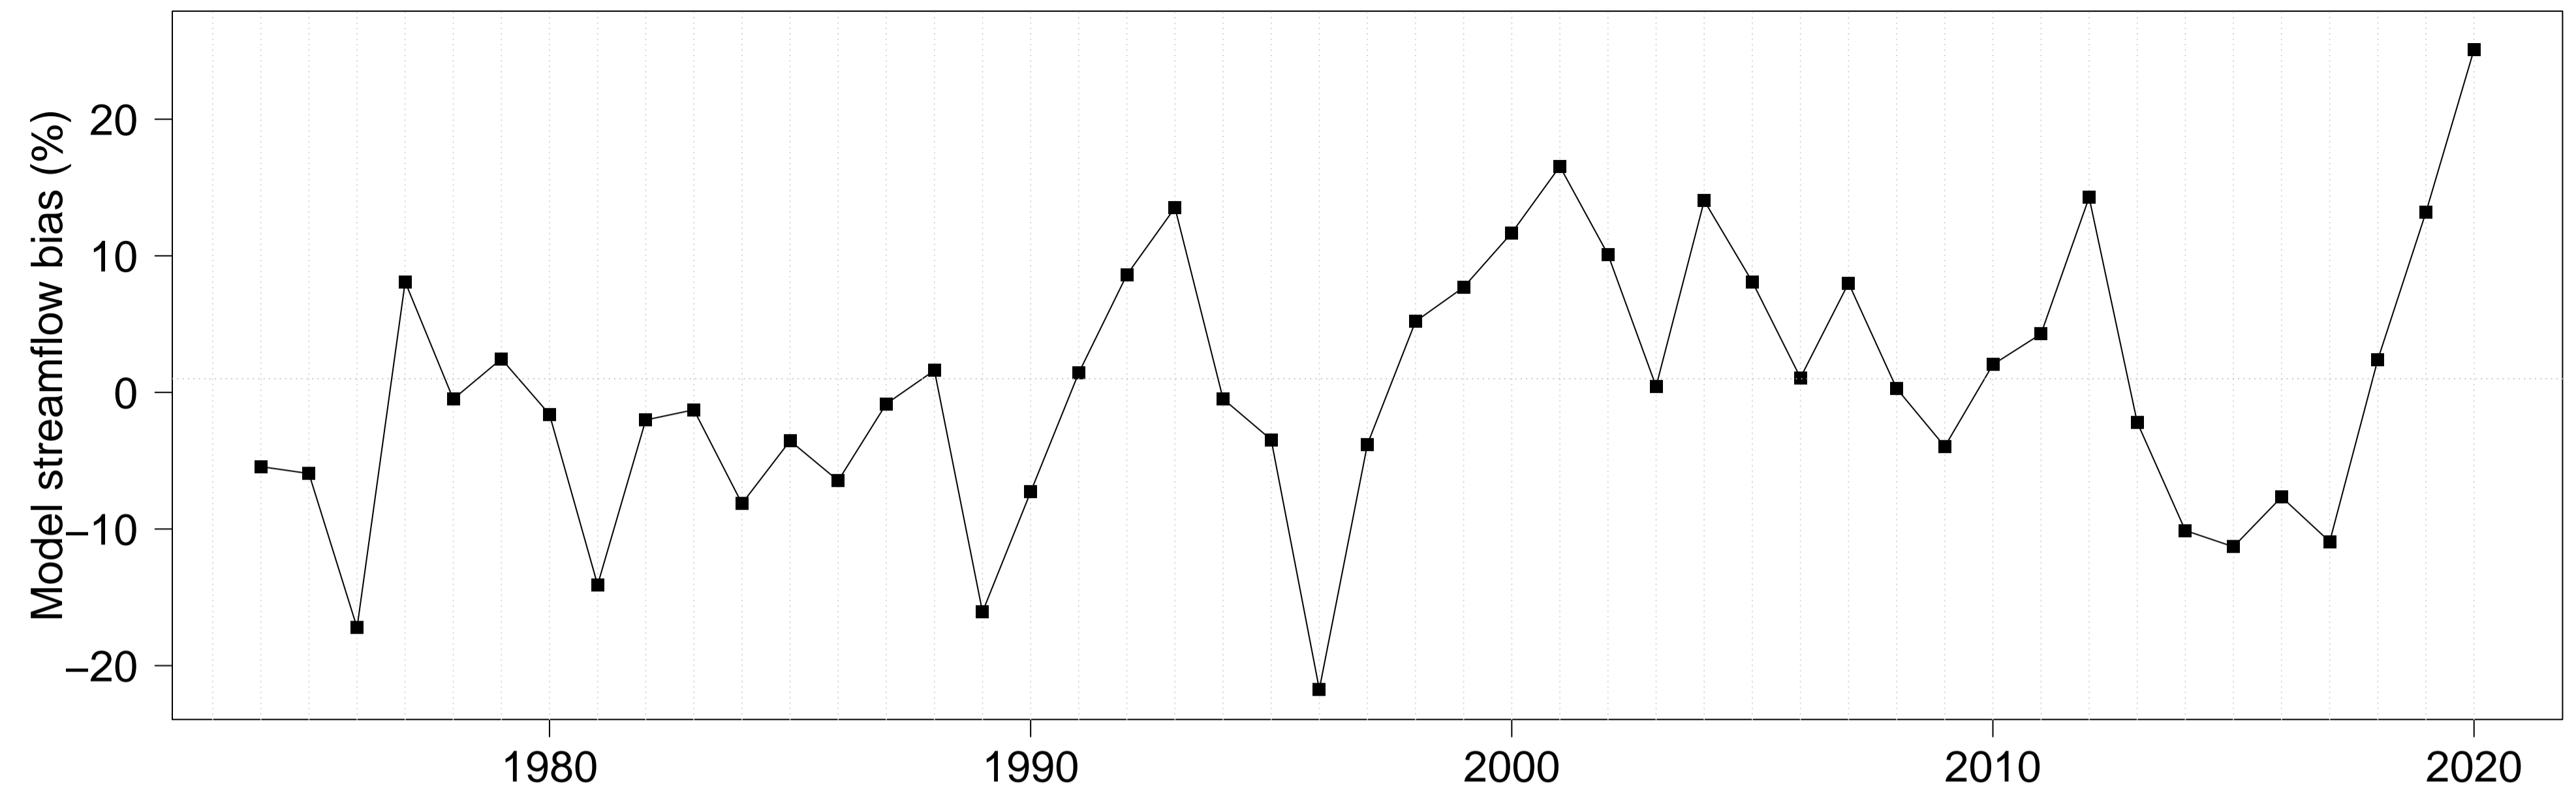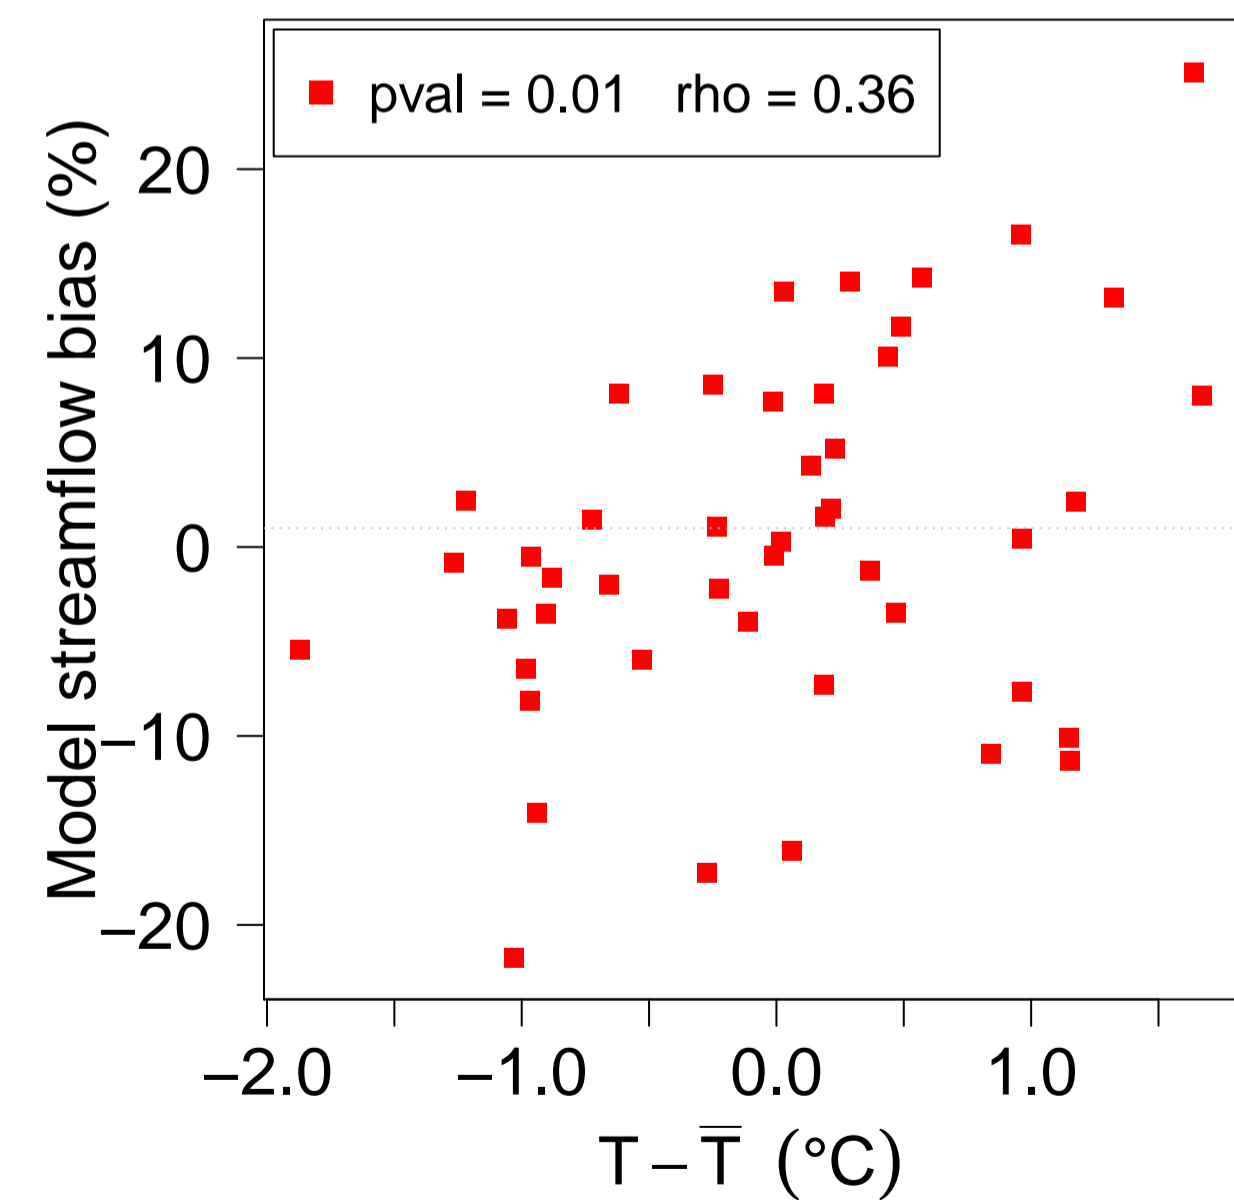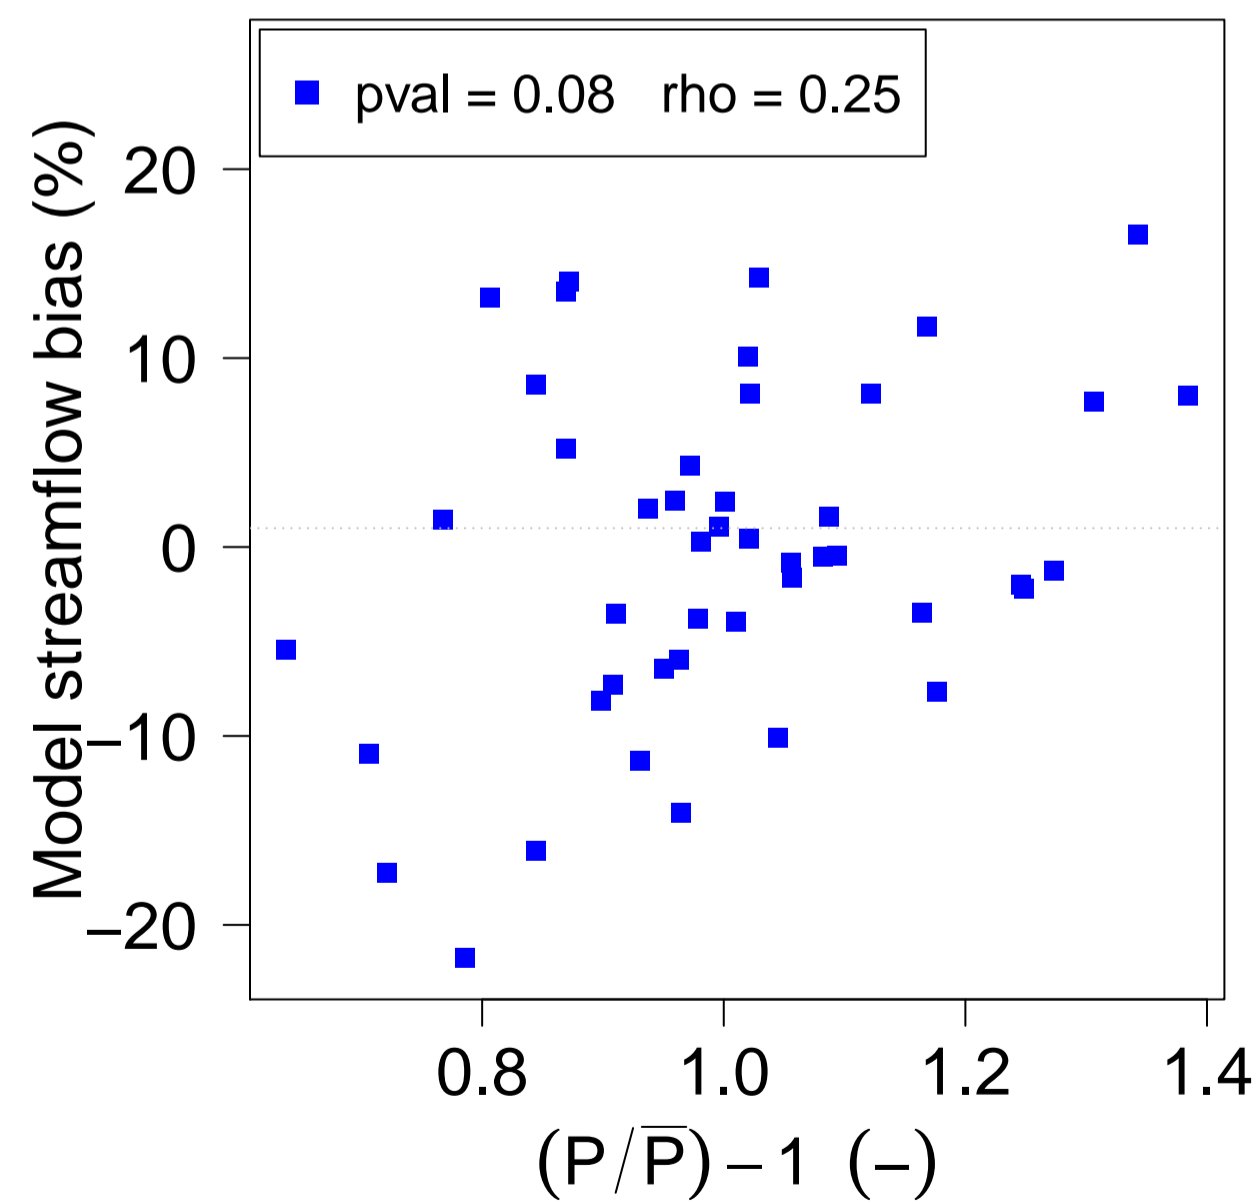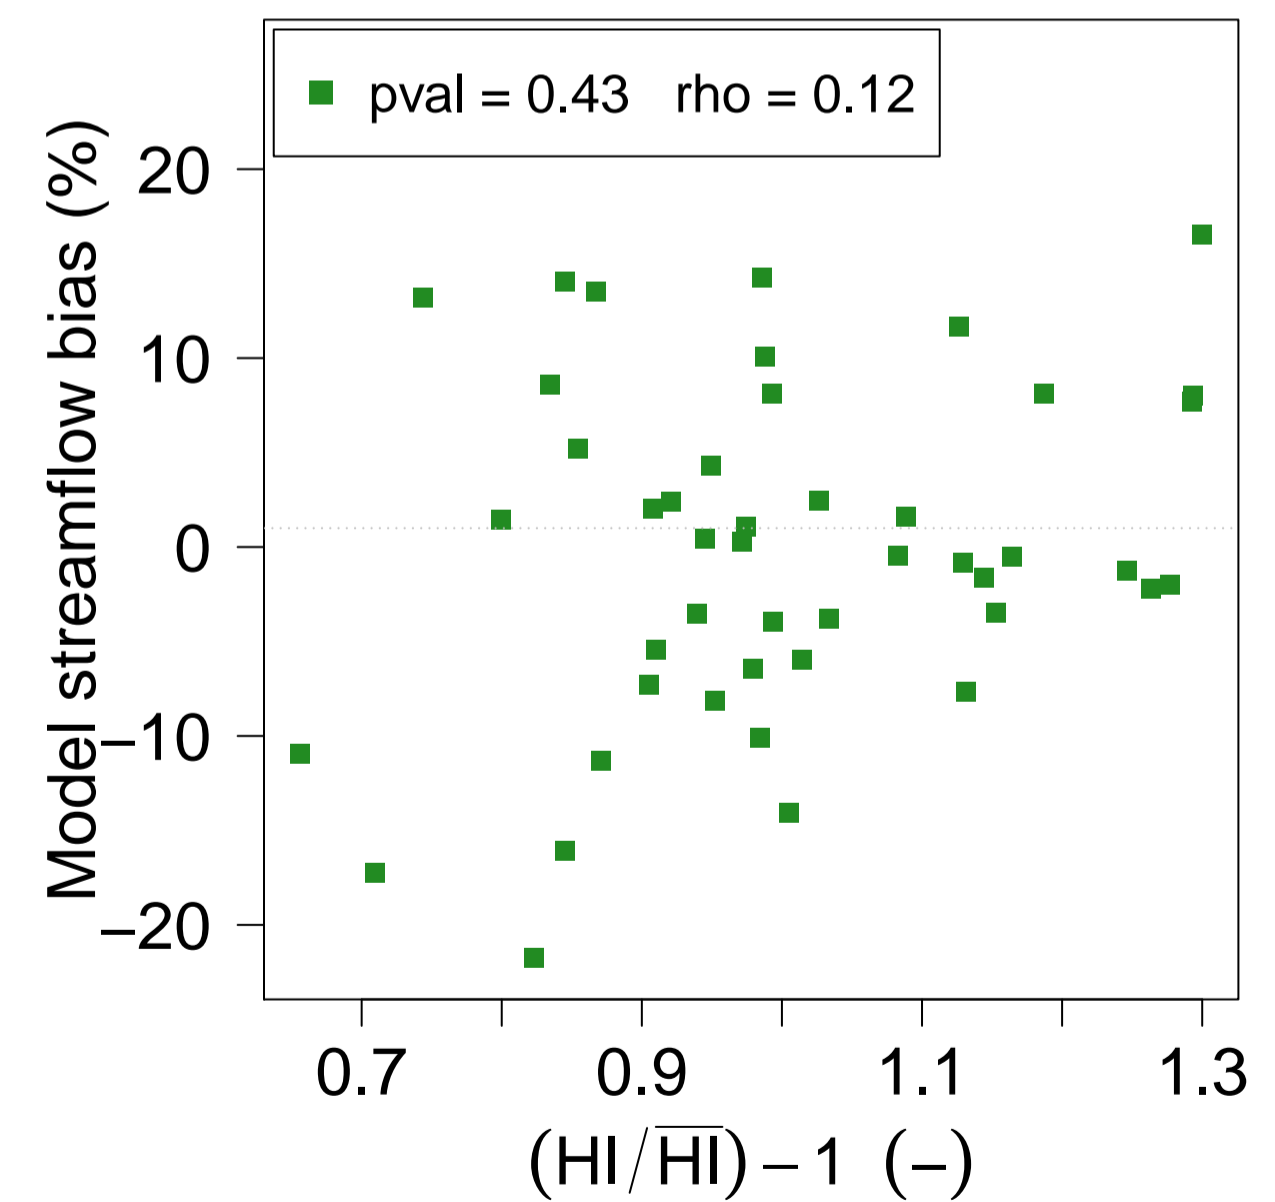

Figure 1. Streamflow annual bias obtained with the RAT function of time (top), temperature absolute anomalies (bottom left) and precipitation  $P$  (bottom centre) and humidity index  $P/E_0$  (bottom right) anomalies, for the catchment A1080330



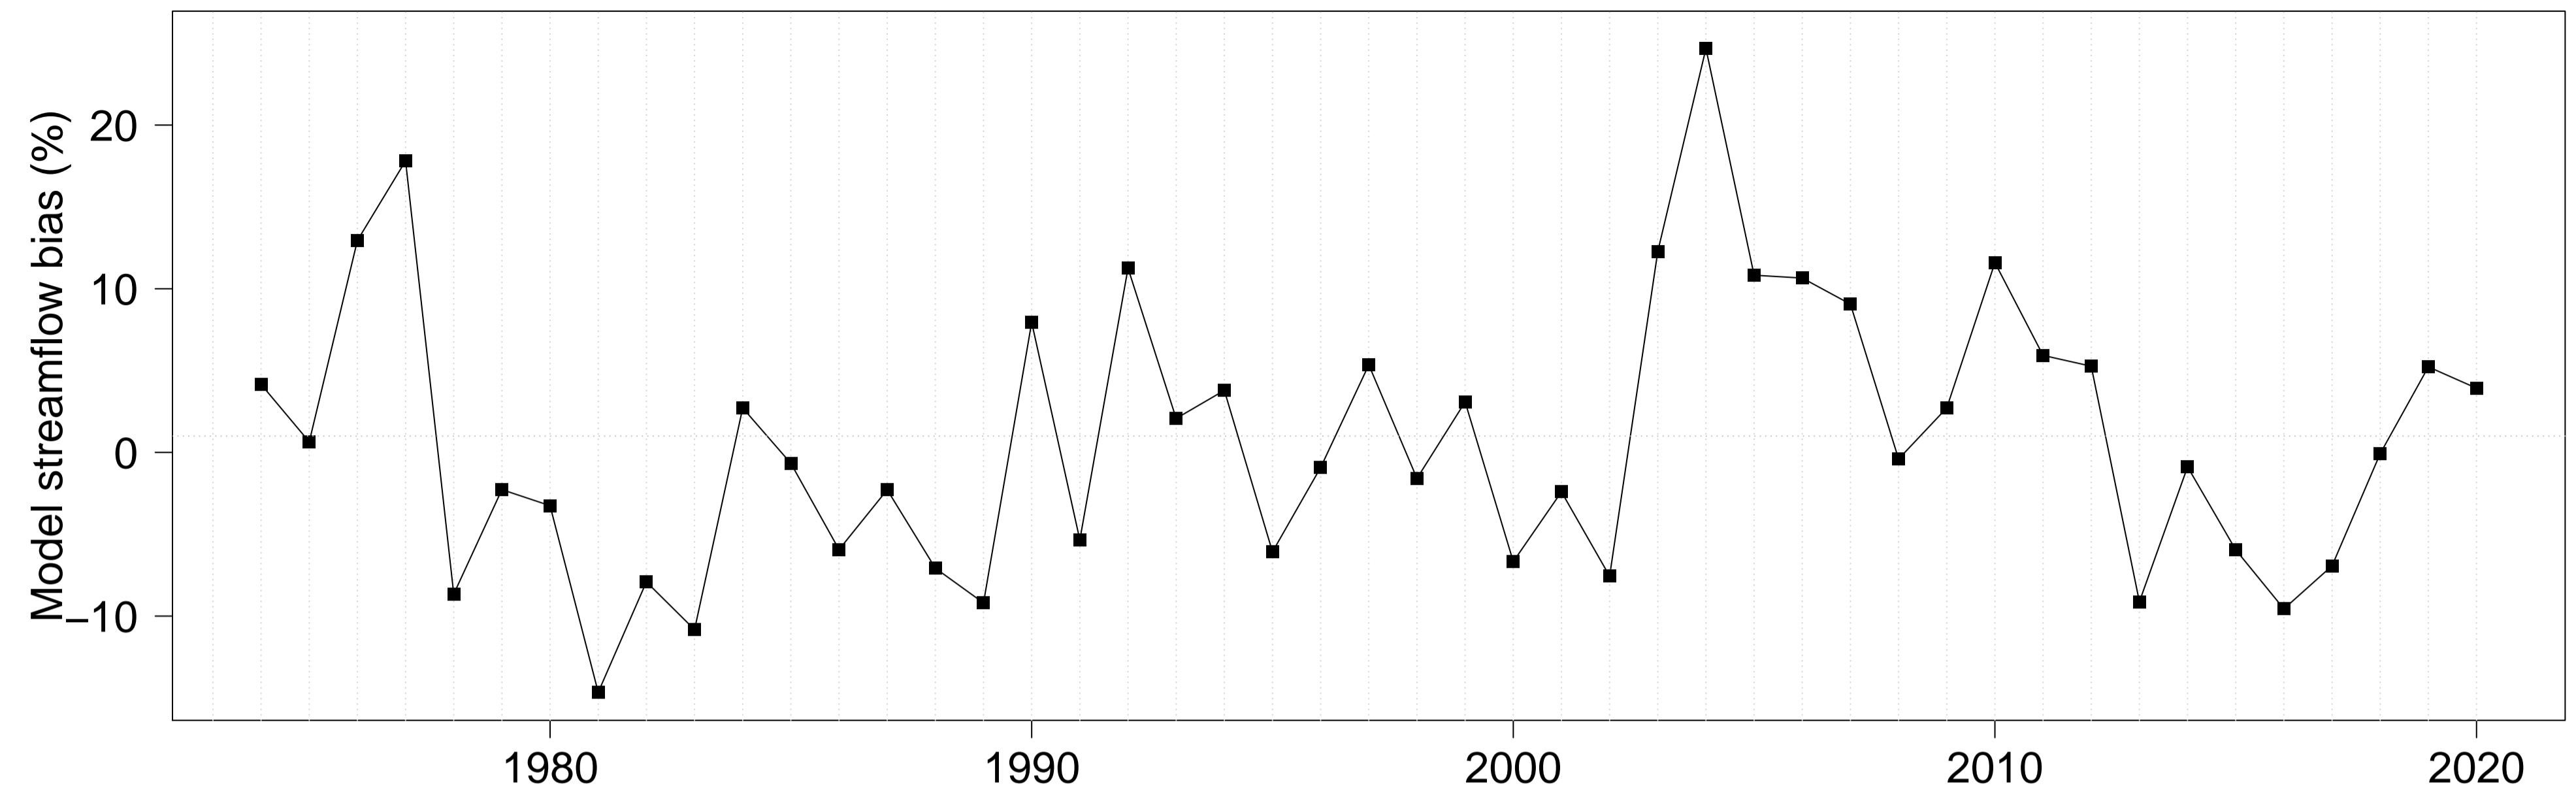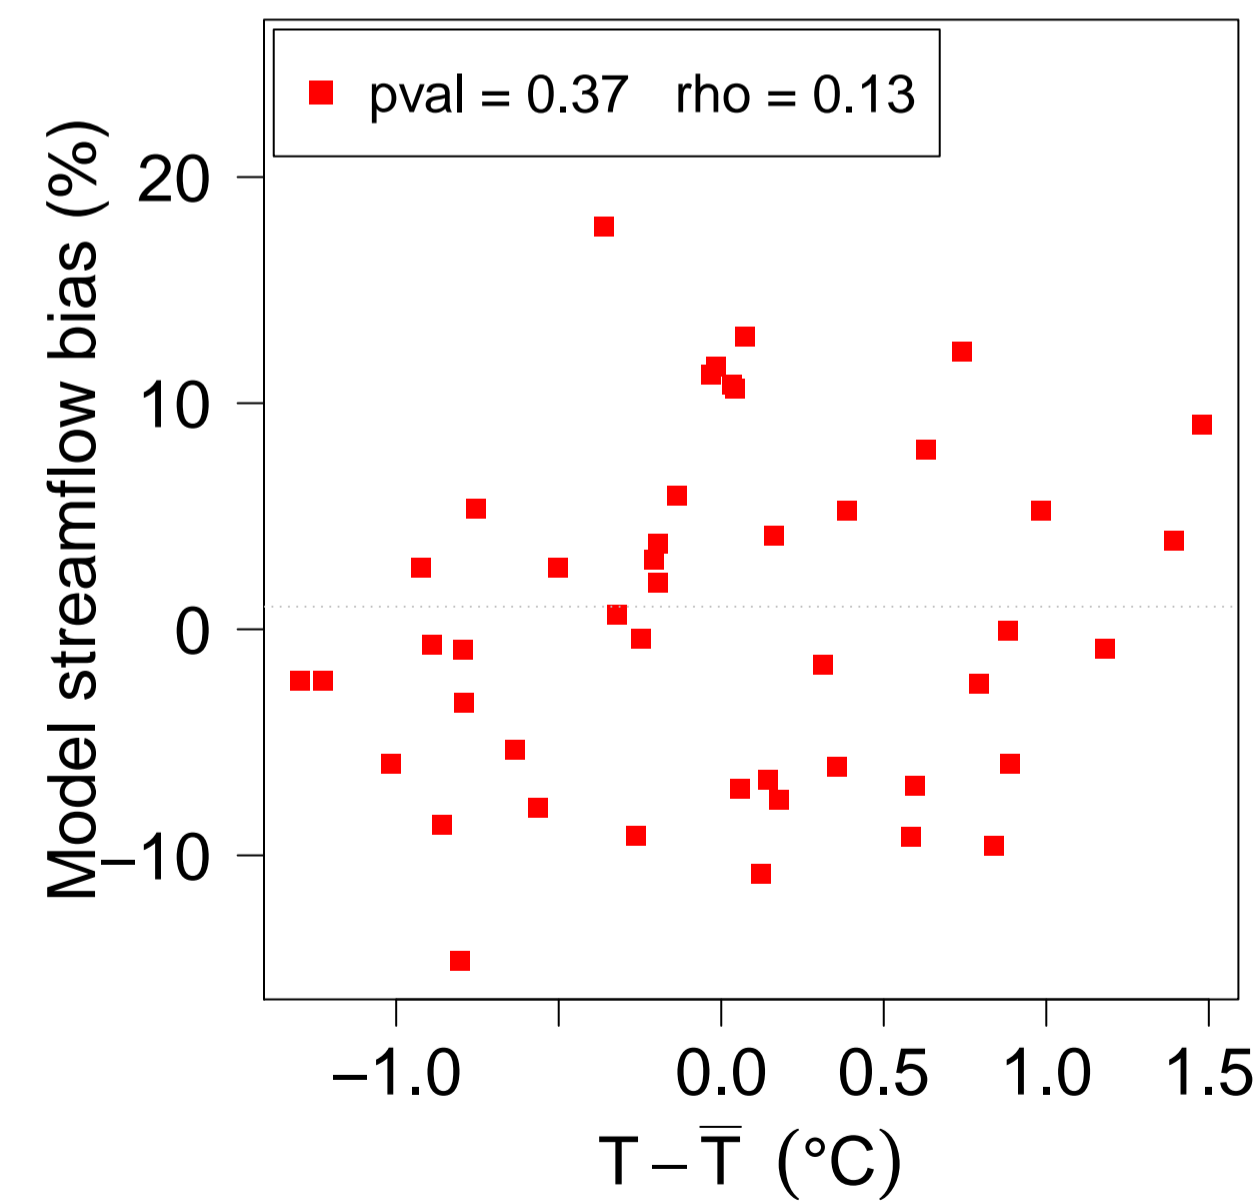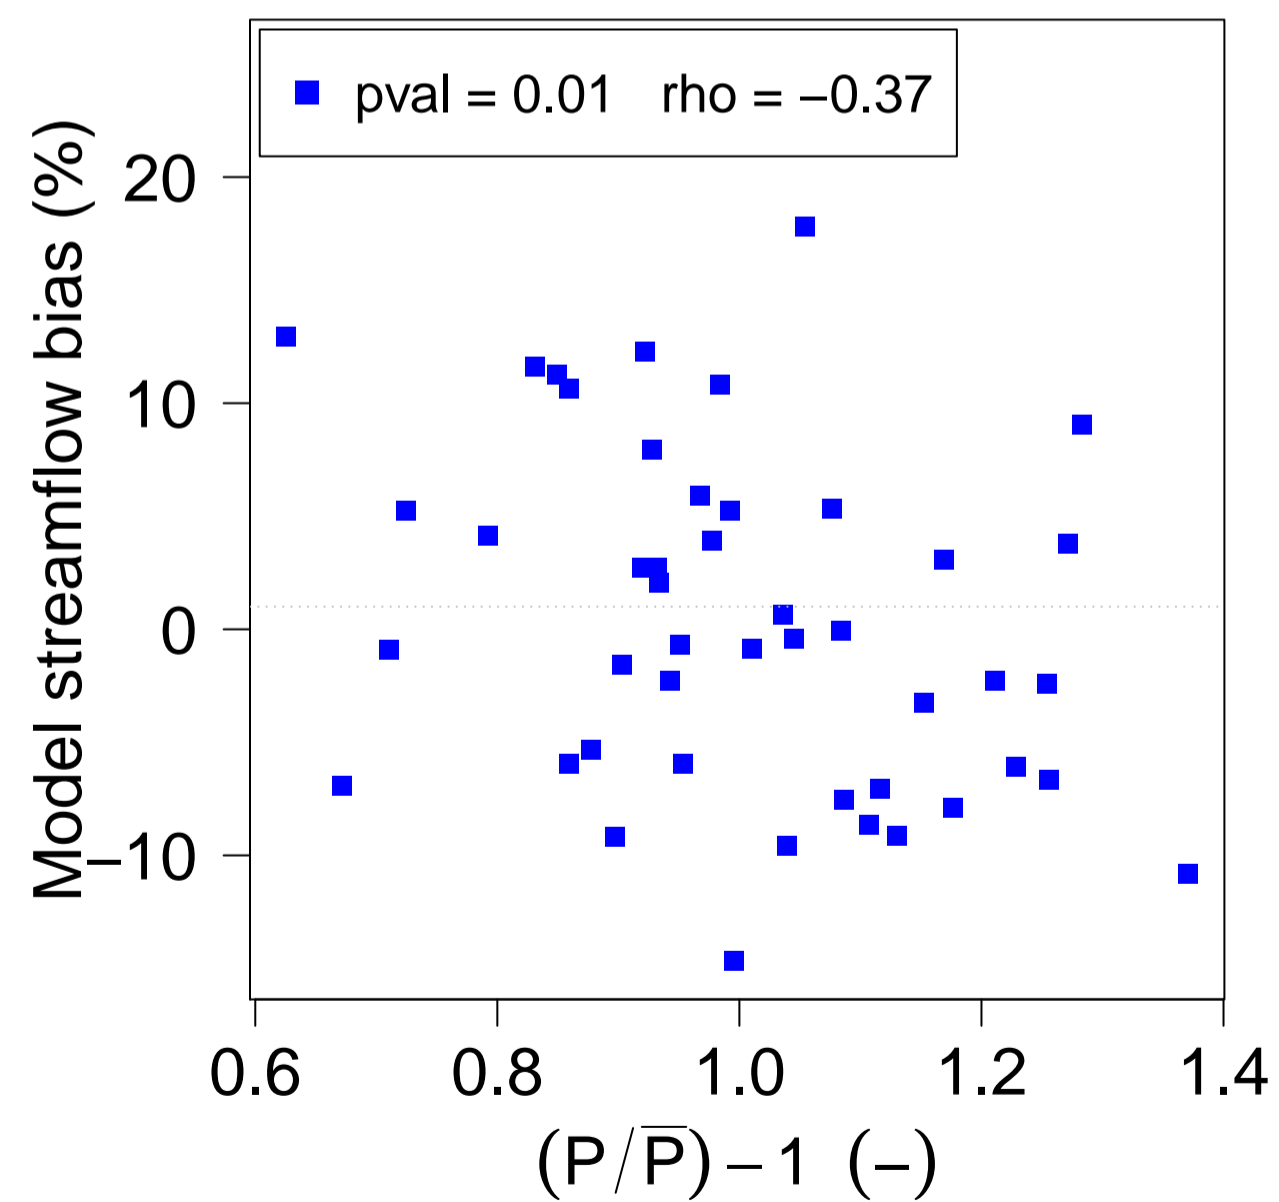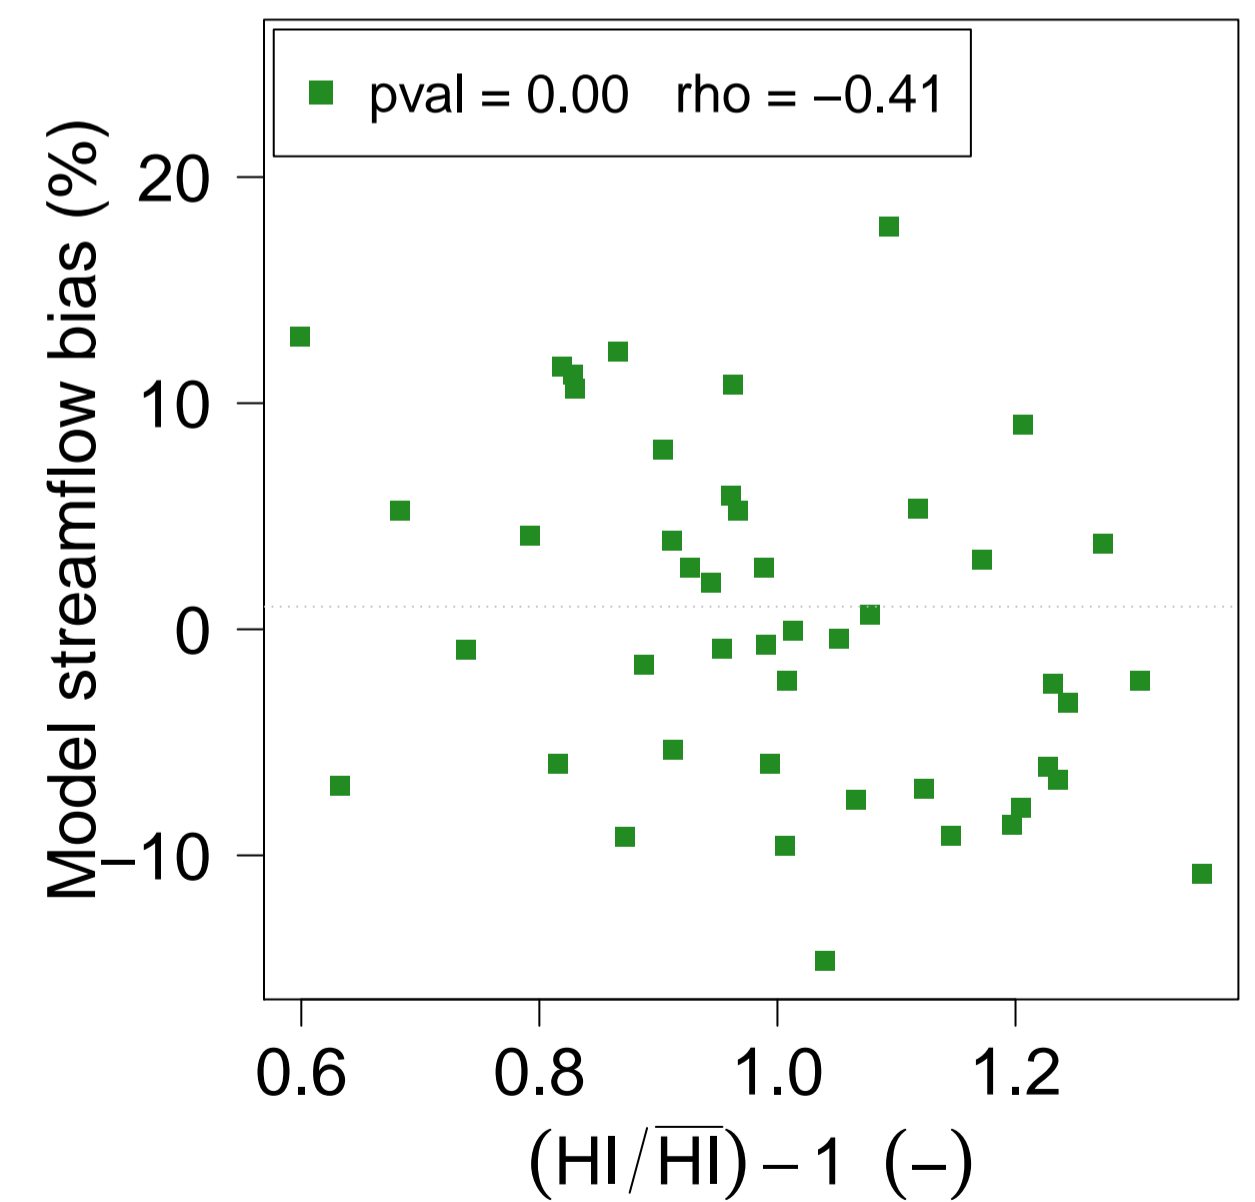

Figure 2. Streamflow annual bias obtained with the RAT function of time (top), temperature absolute anomalies (bottom left) and precipitation  $P$  (bottom centre) and humidity index  $P/E_0$  (bottom right) anomalies, for the catchment B2220010

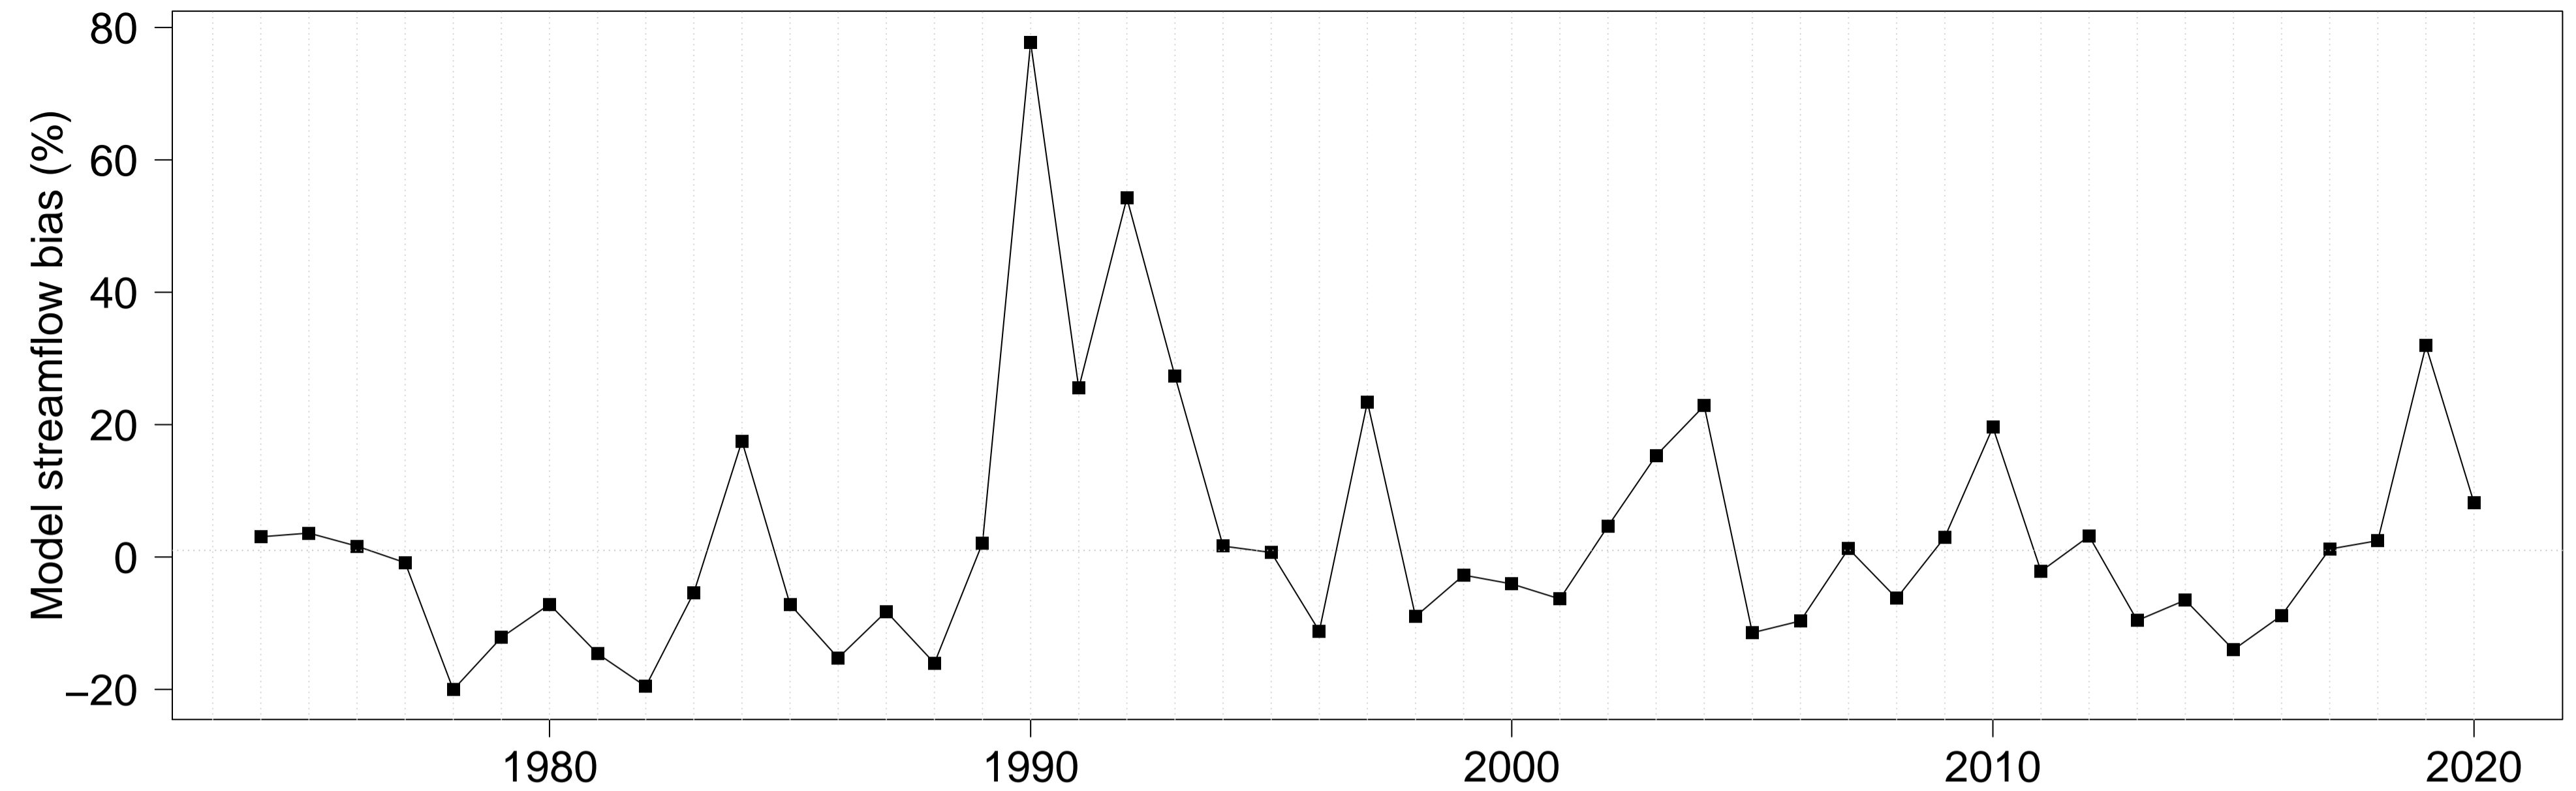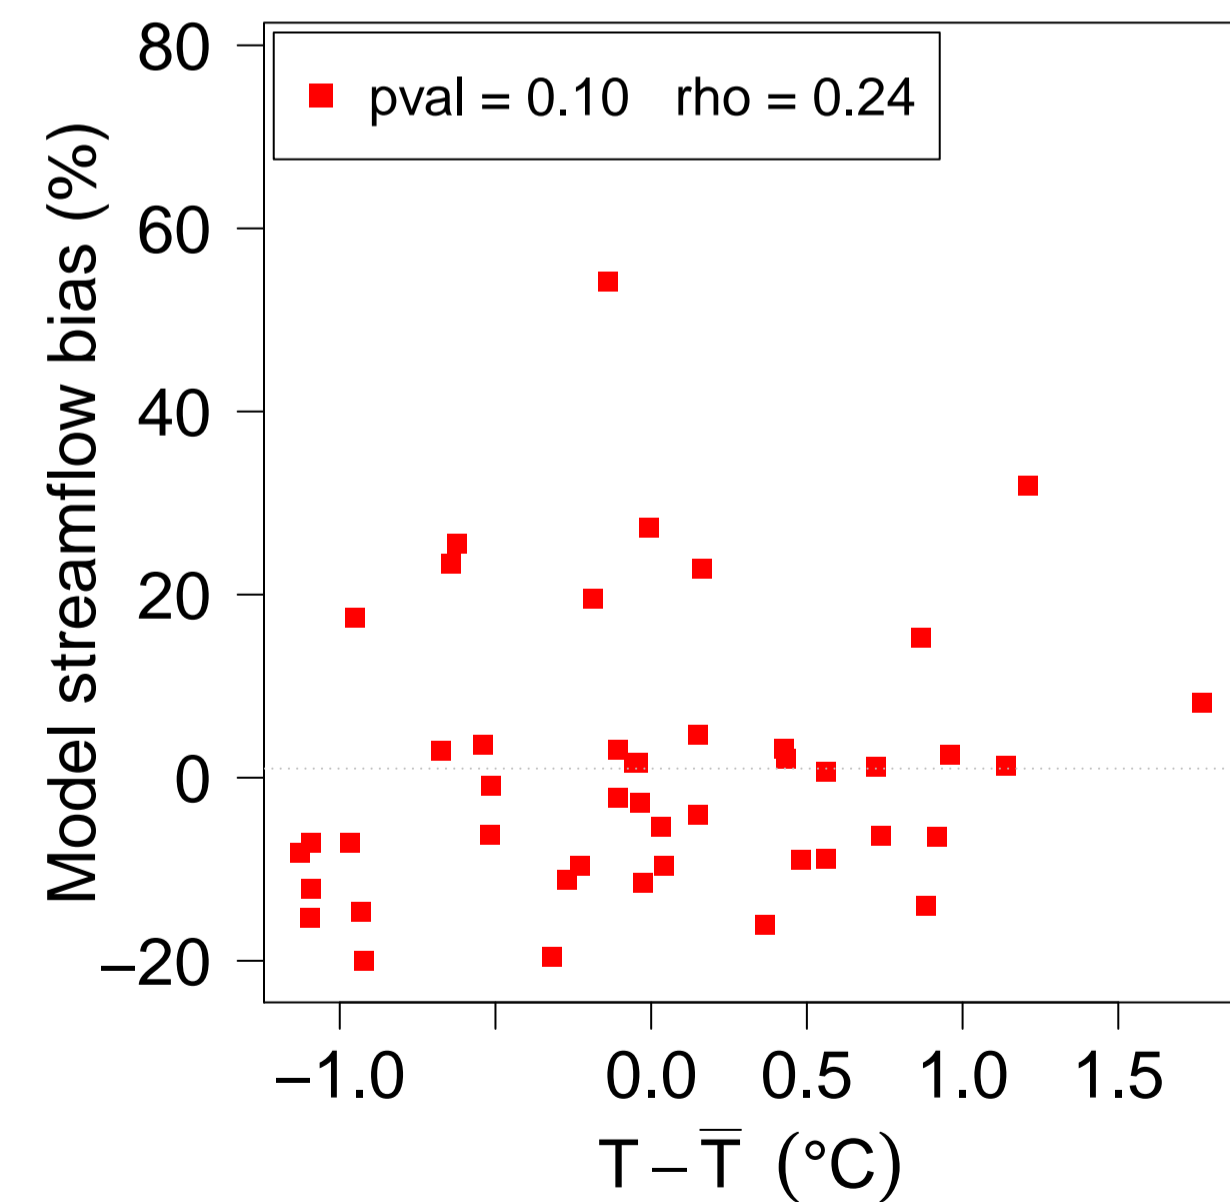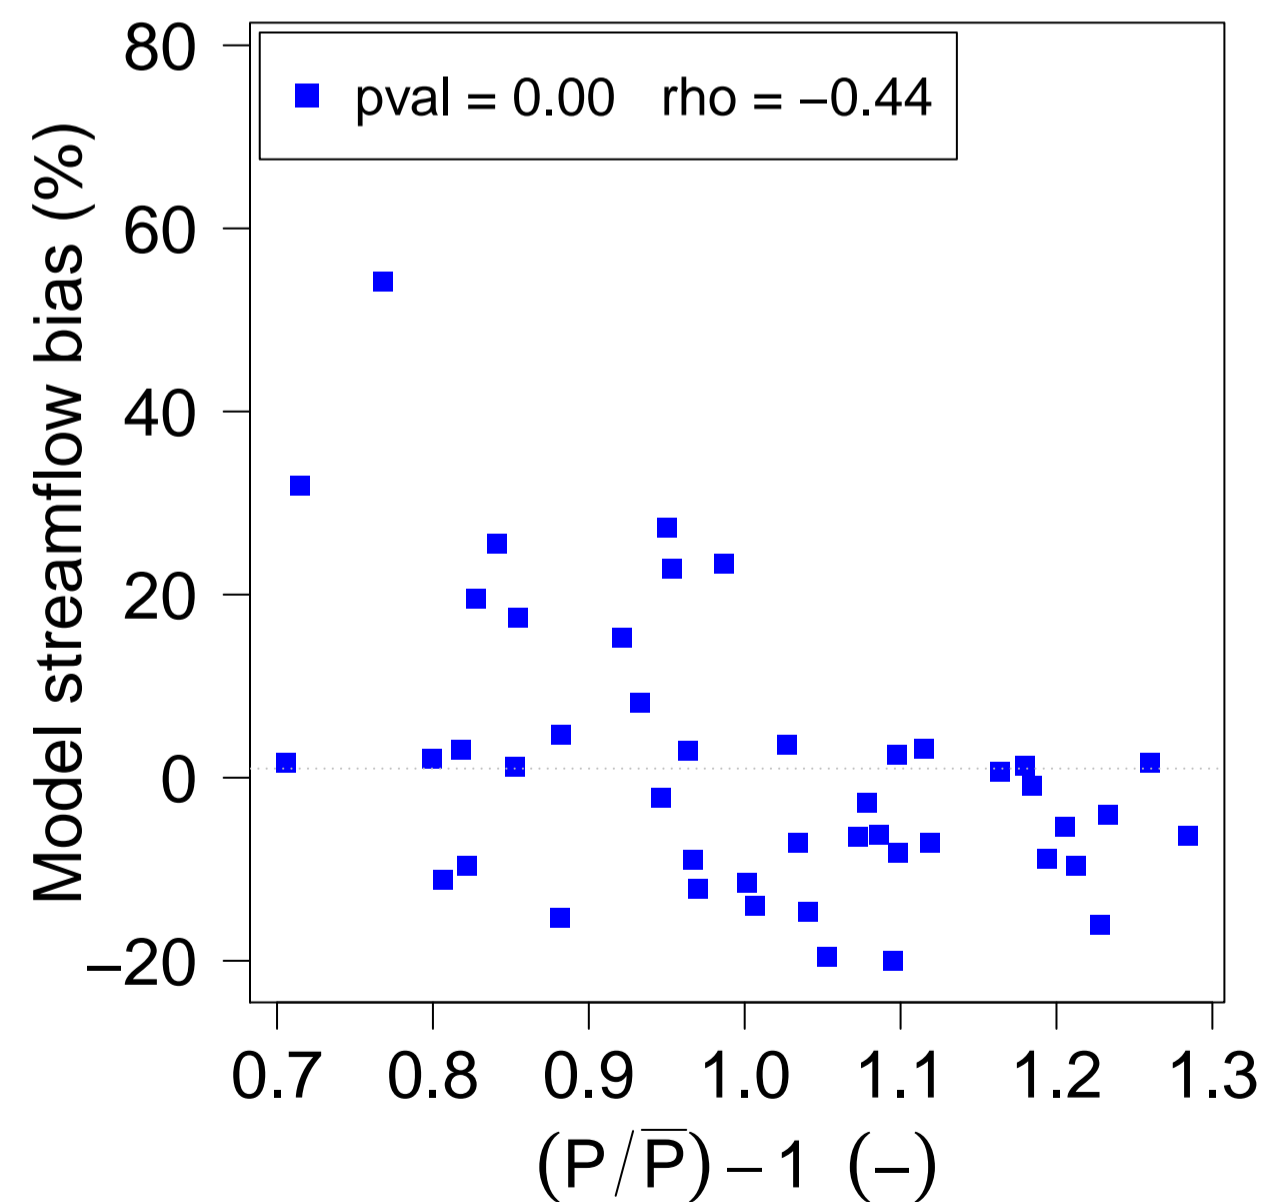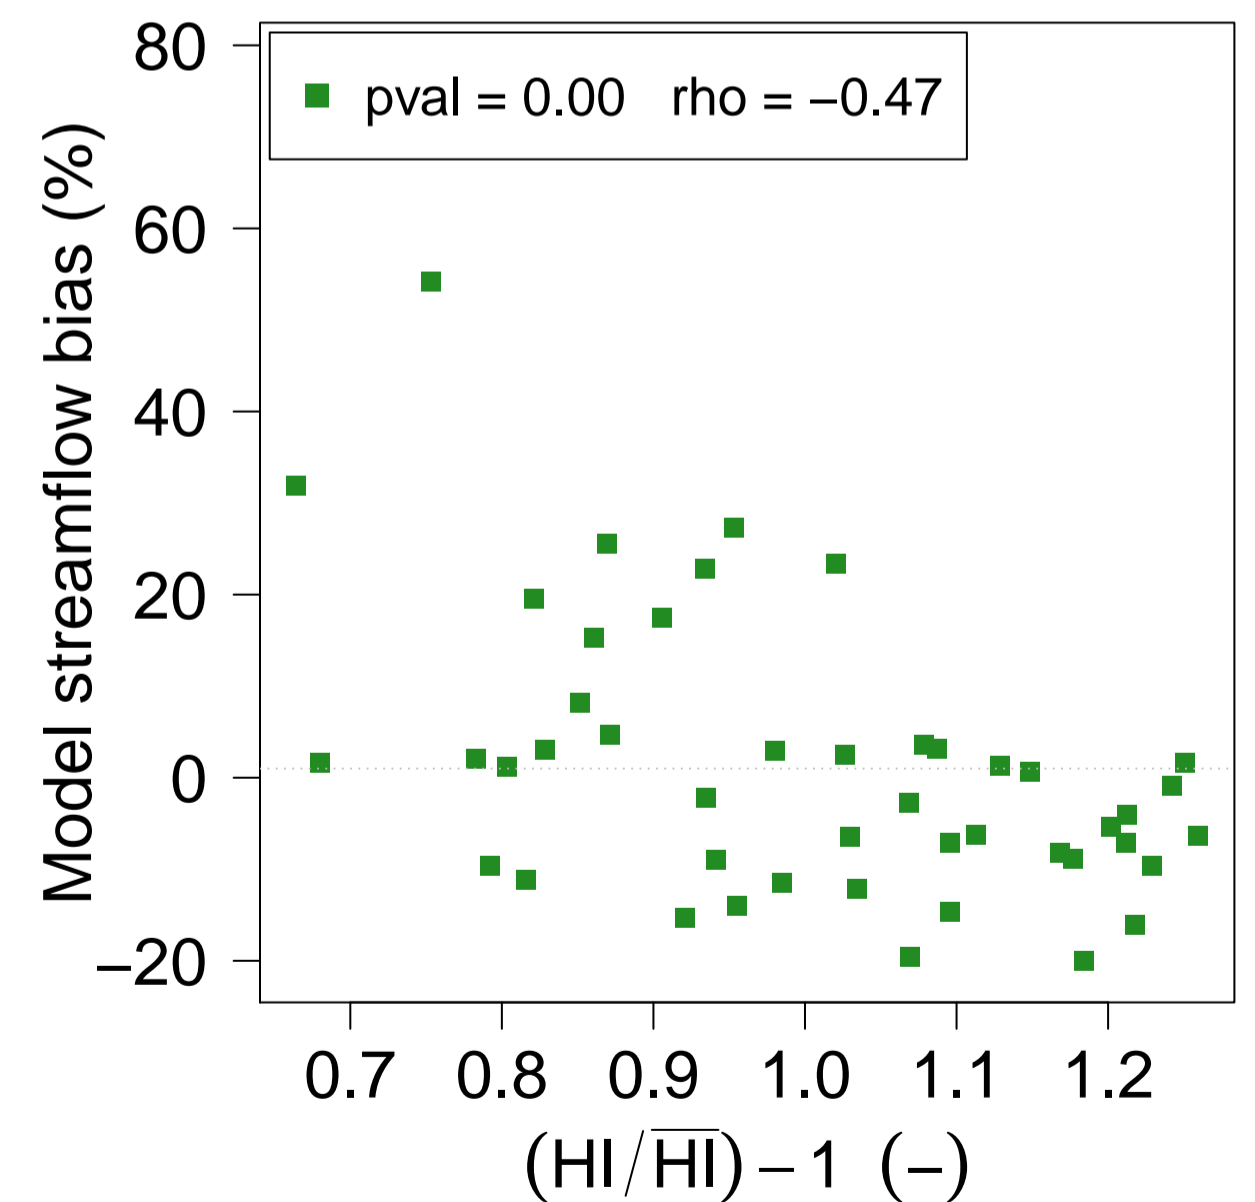

Figure 3. Streamflow annual bias obtained with the RAT function of time (top), temperature absolute anomalies (bottom left) and precipitation  $P$  (bottom centre) and humidity index  $P/E_0$  (bottom right) anomalies, for the catchment H2342020

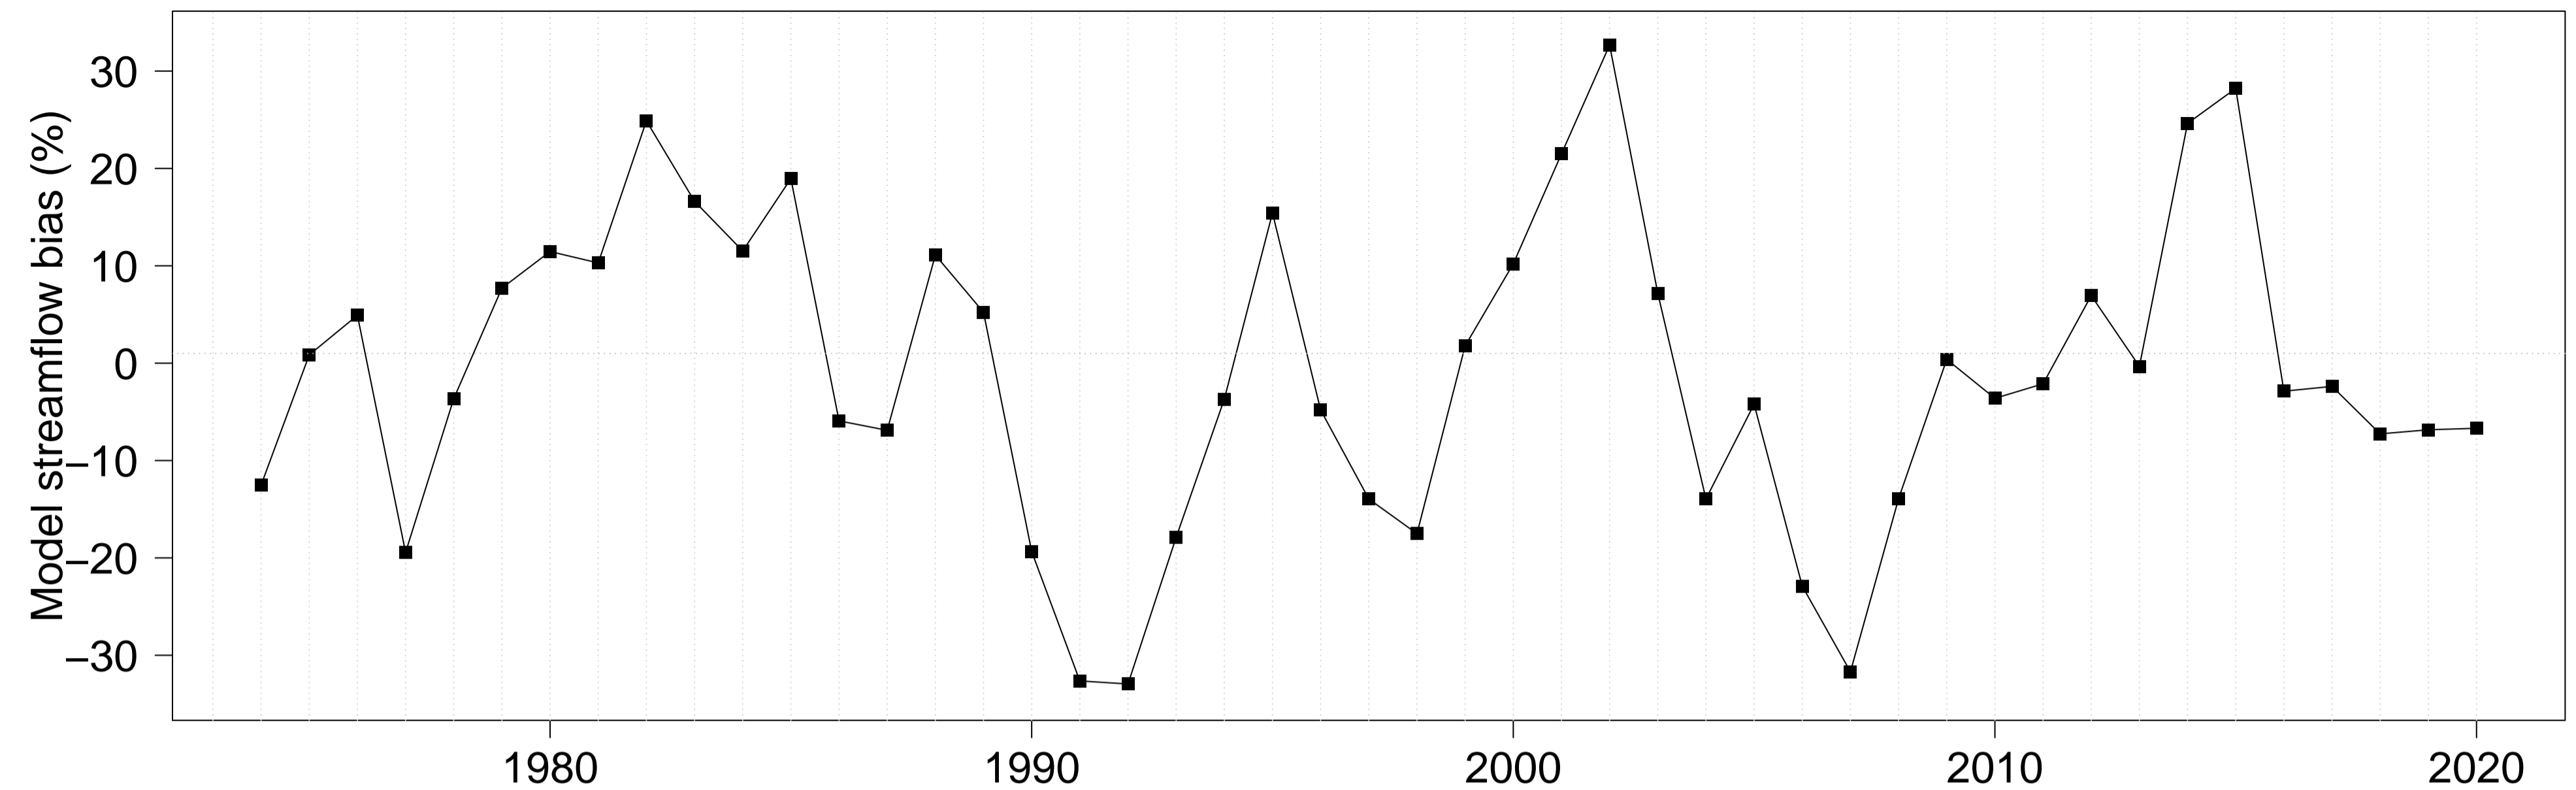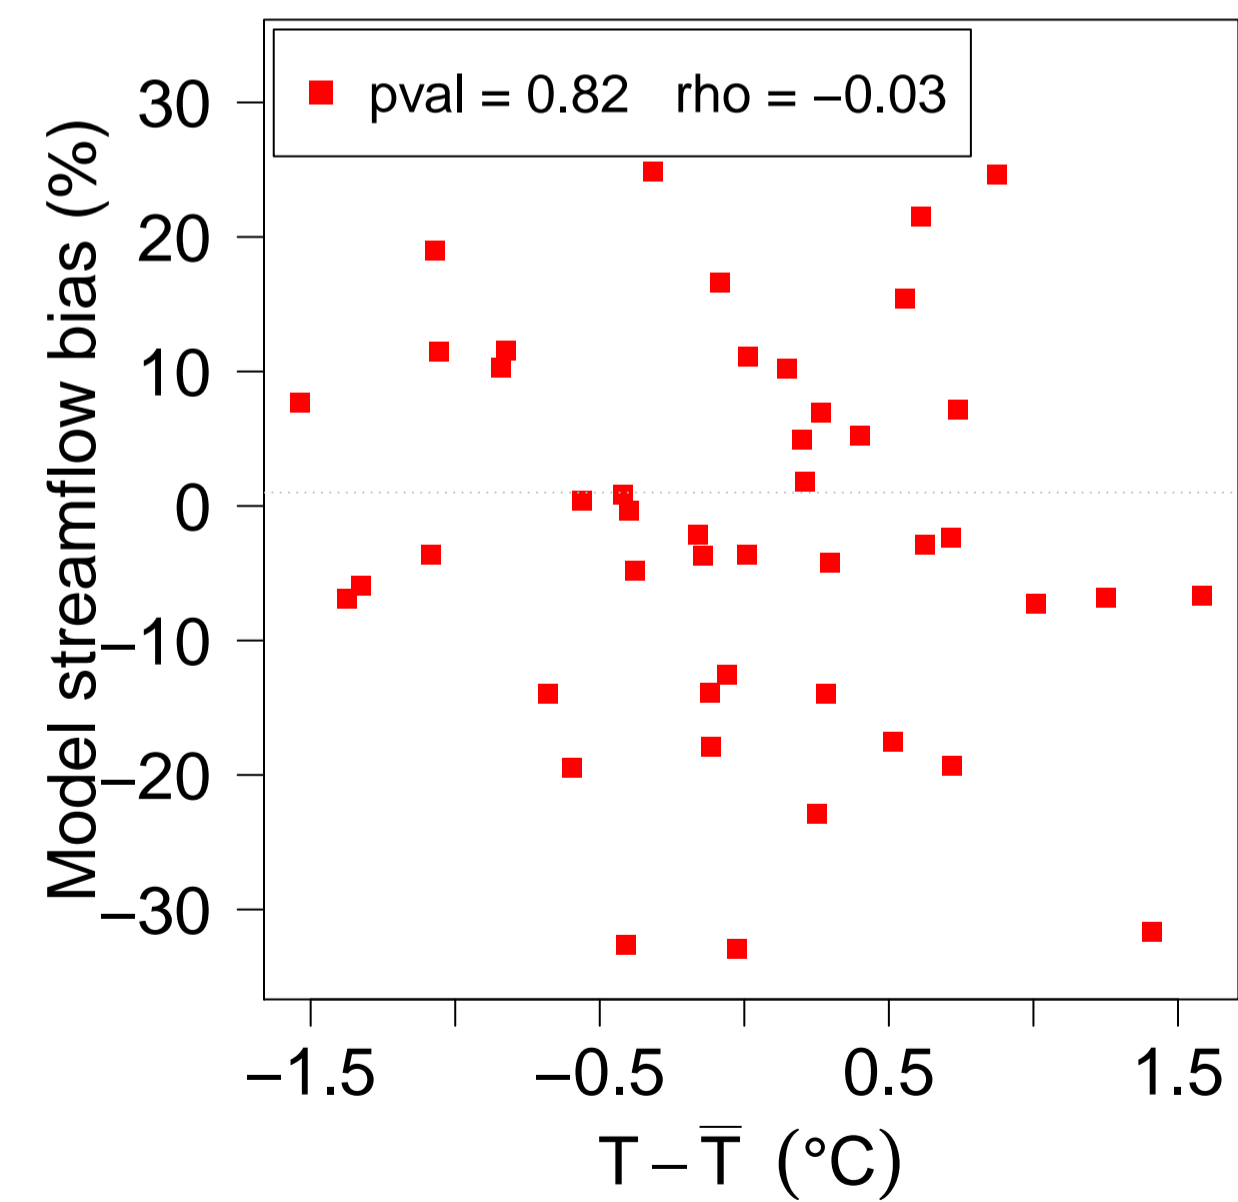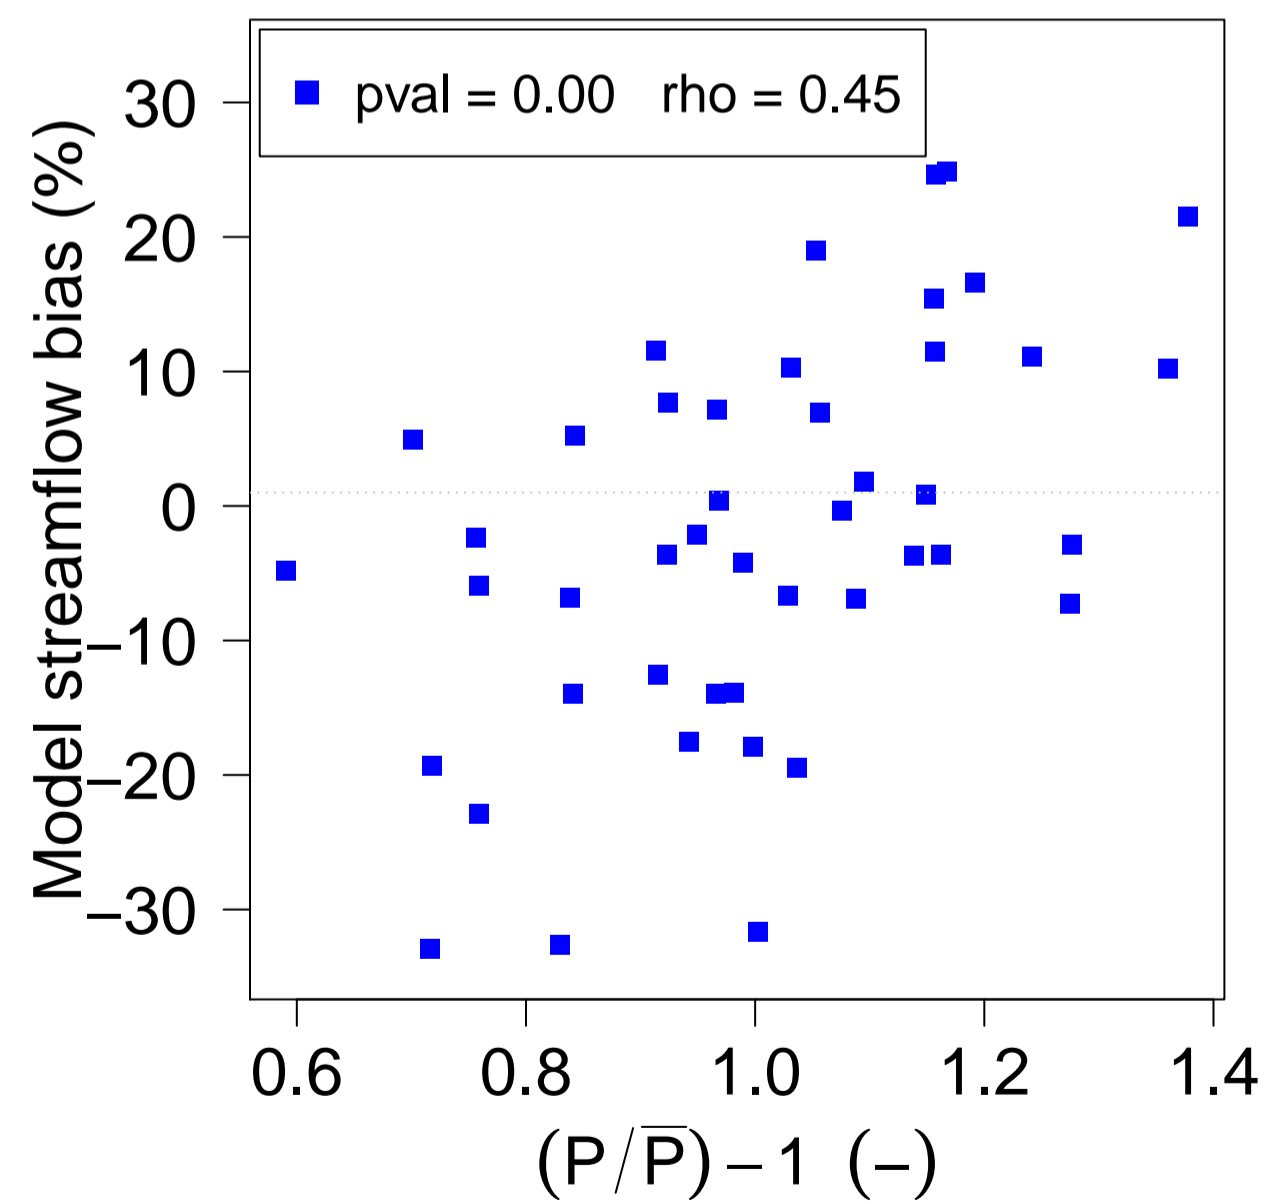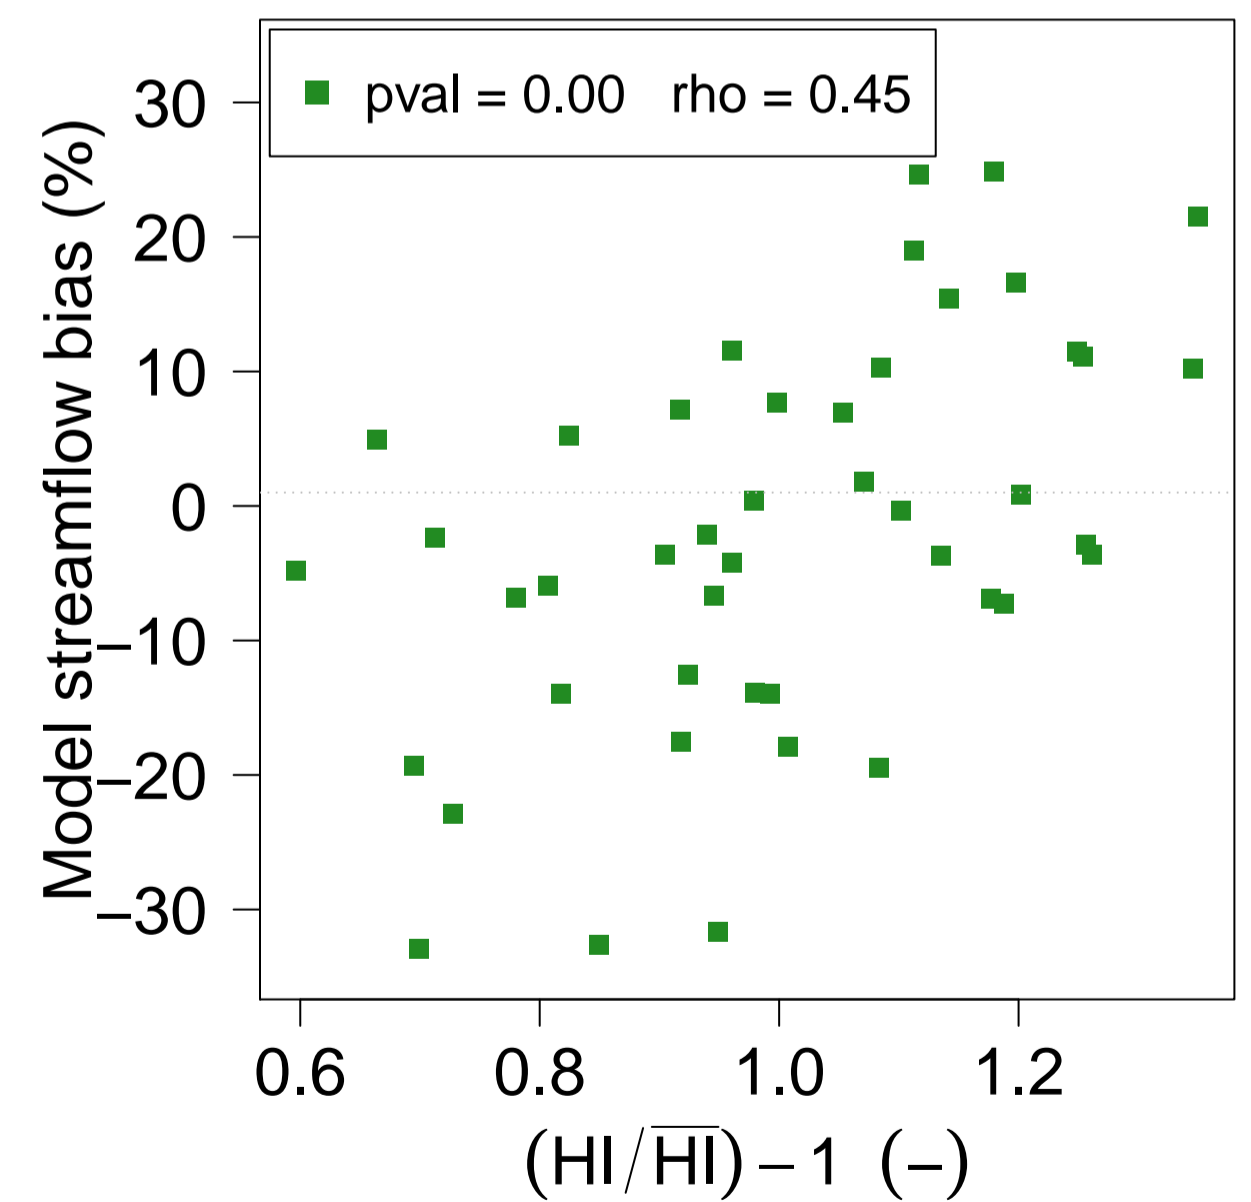

Figure 4. Streamflow annual bias obtained with the RAT function of time (top), temperature absolute anomalies (bottom left) and precipitation  $P$  (bottom centre) and humidity index  $P/E_0$  (bottom right) anomalies, for the catchment H4252010

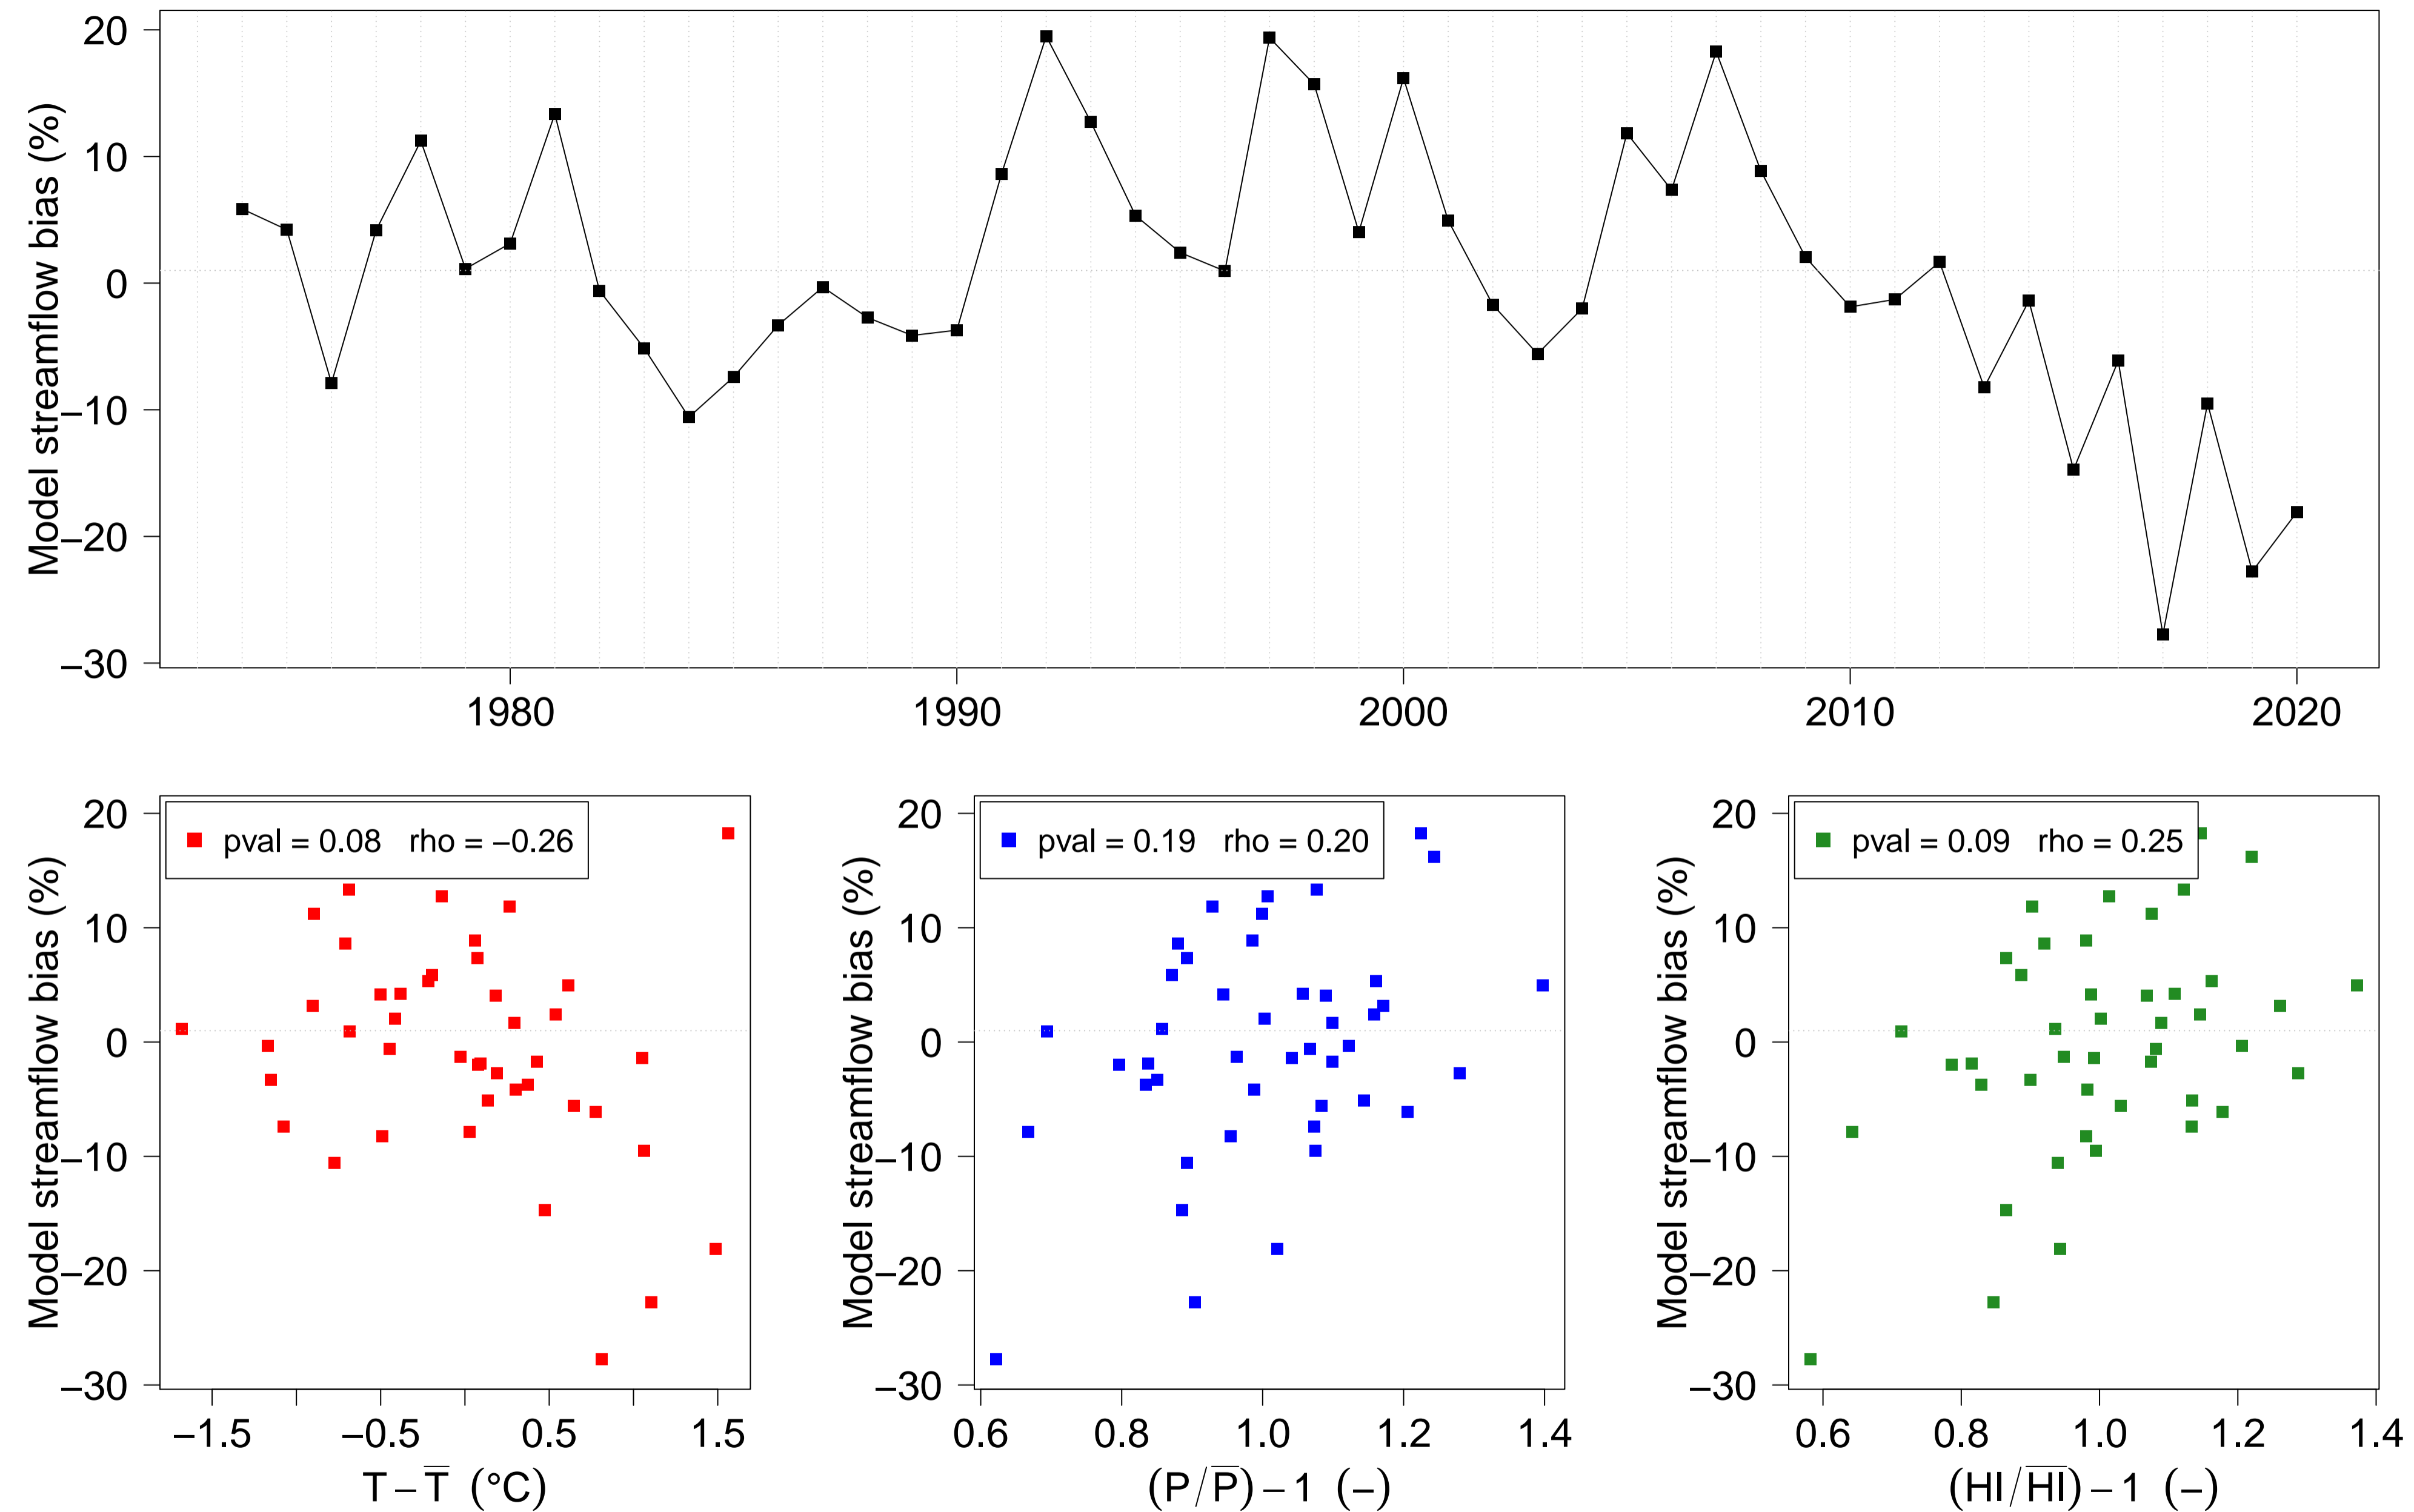

Figure 5. Streamflow annual bias obtained with the RAT function of time (top), temperature absolute anomalies (bottom left) and precipitation  $P$  (bottom centre) and humidity index  $P/E_0$  (bottom right) anomalies, for the catchment H7401010

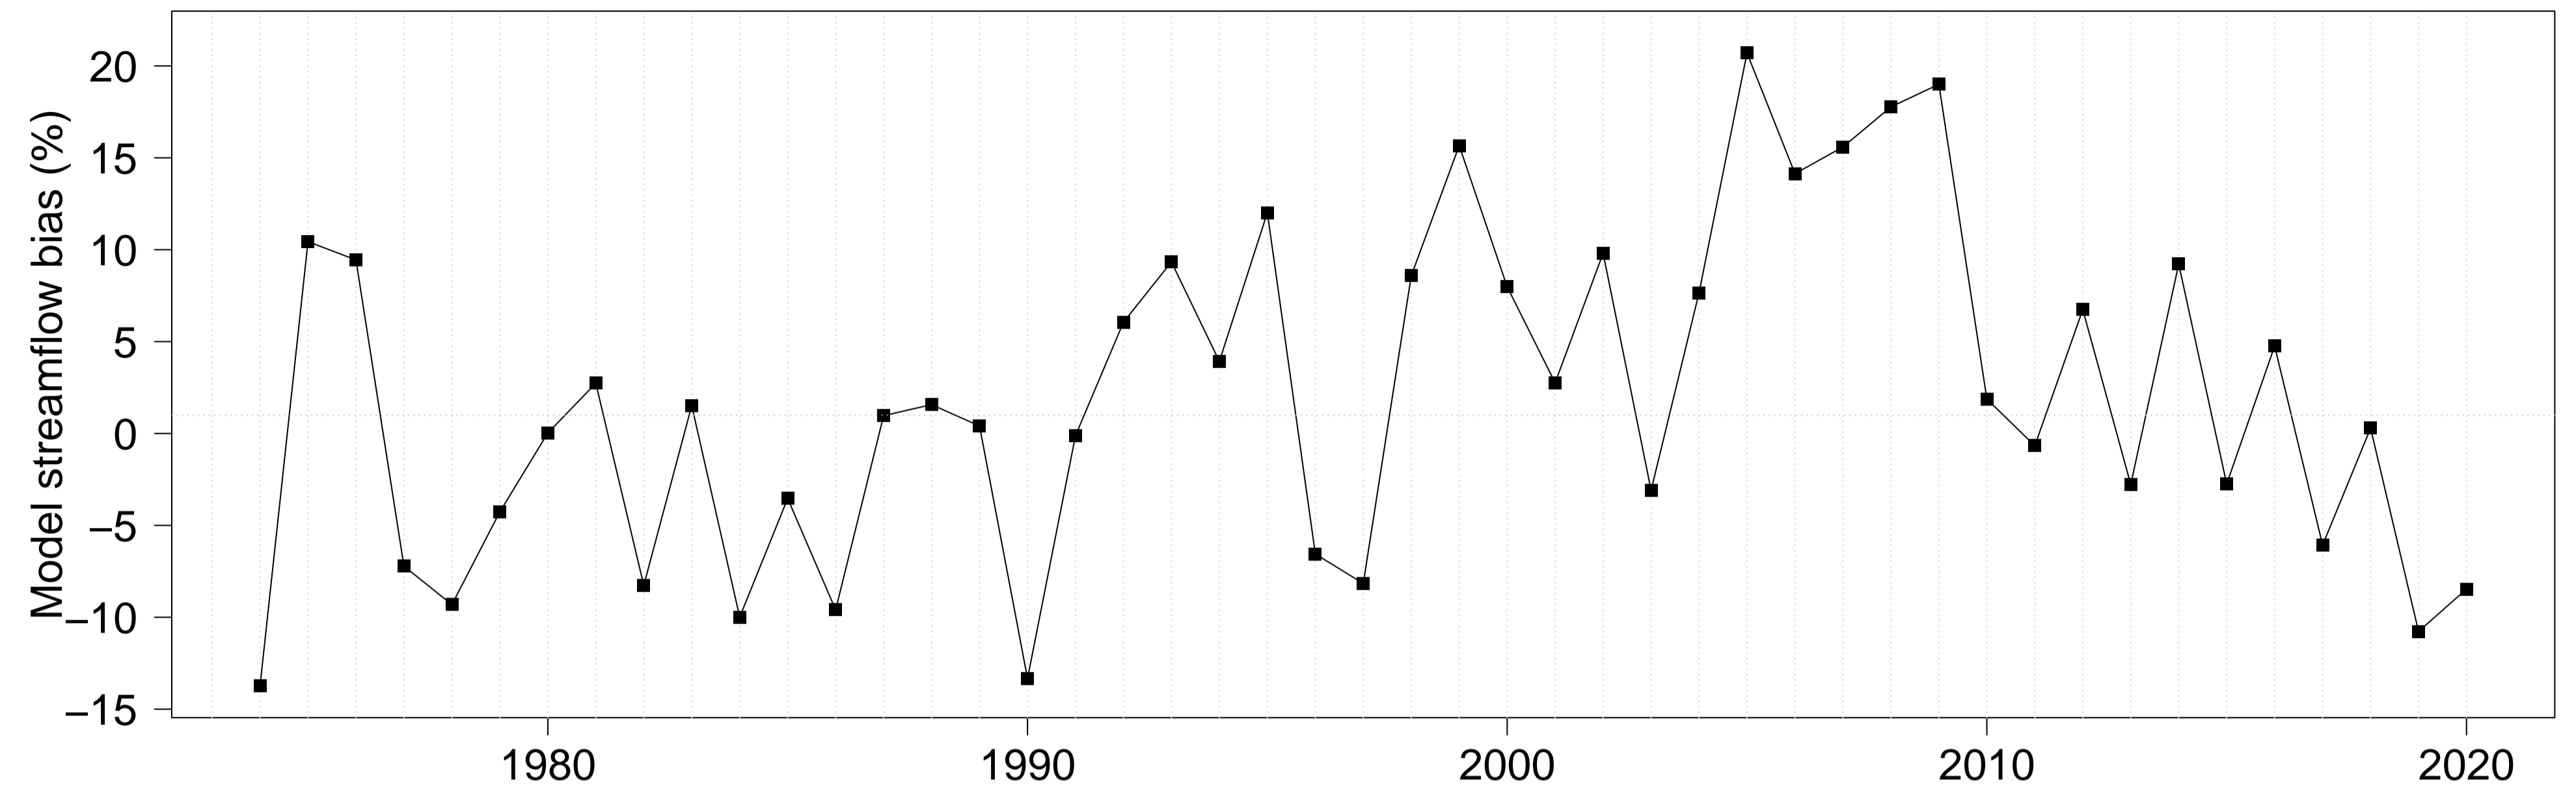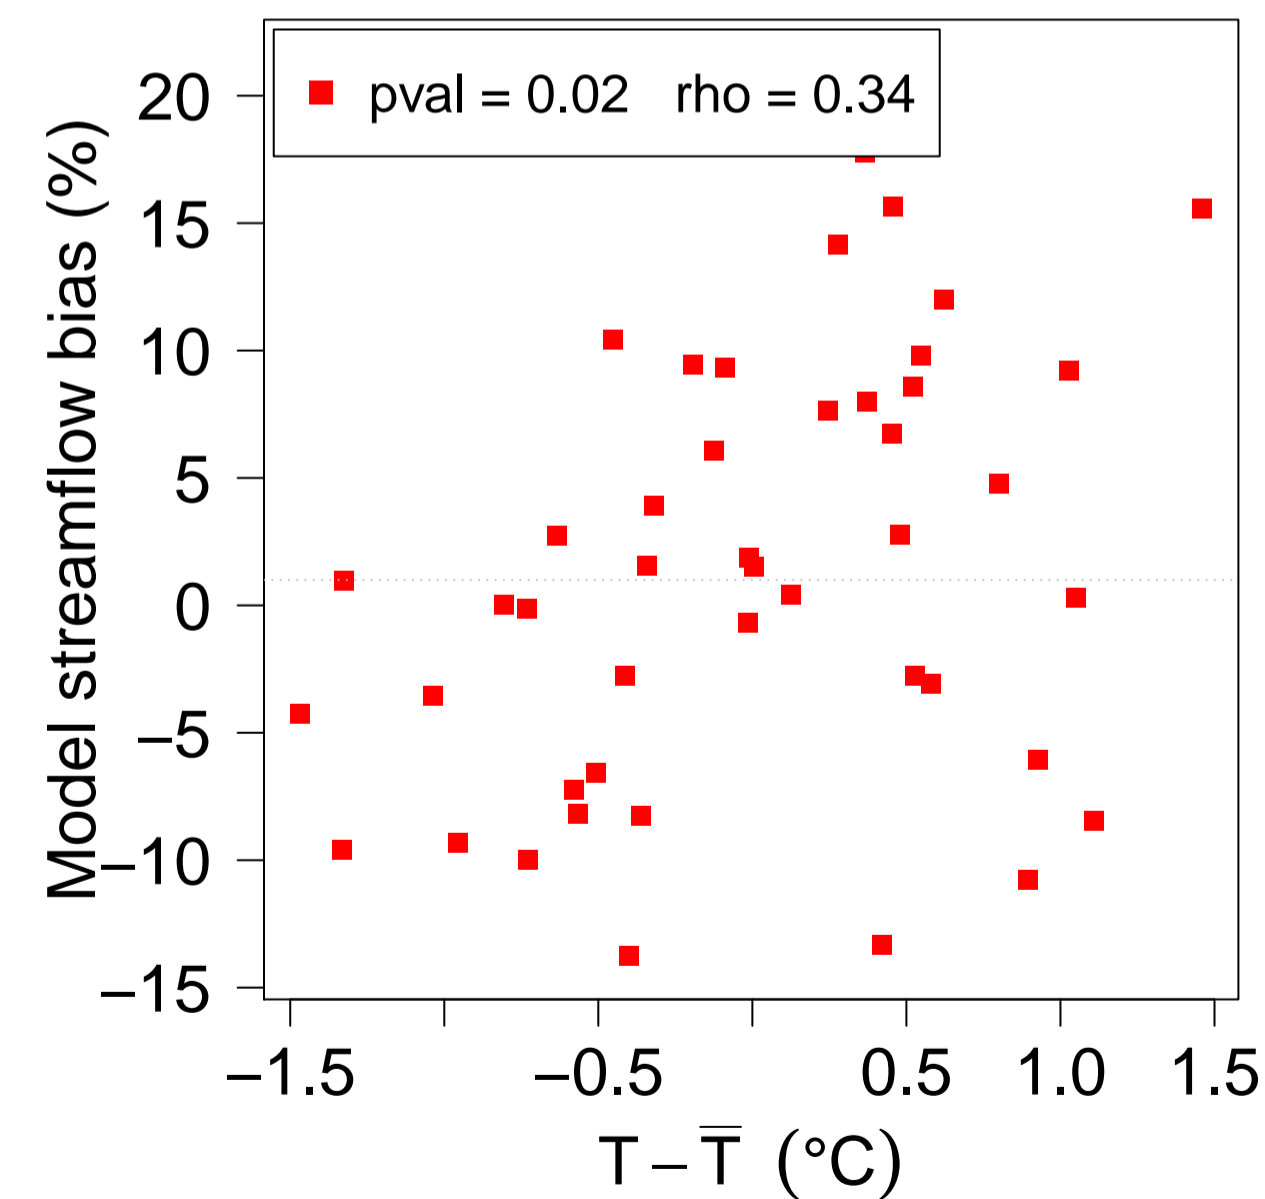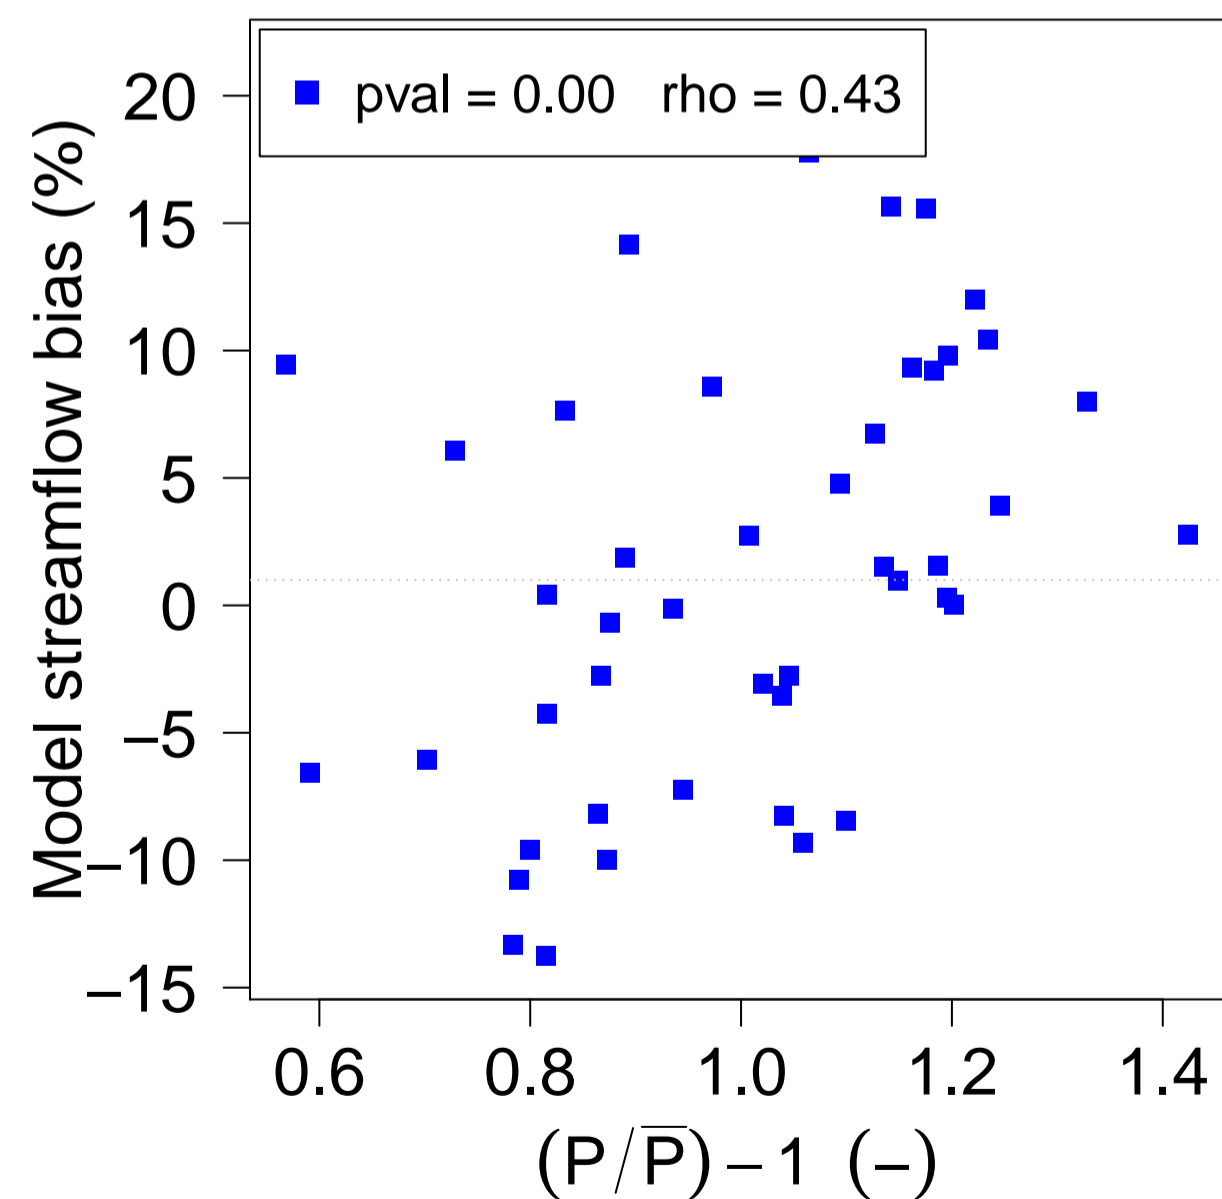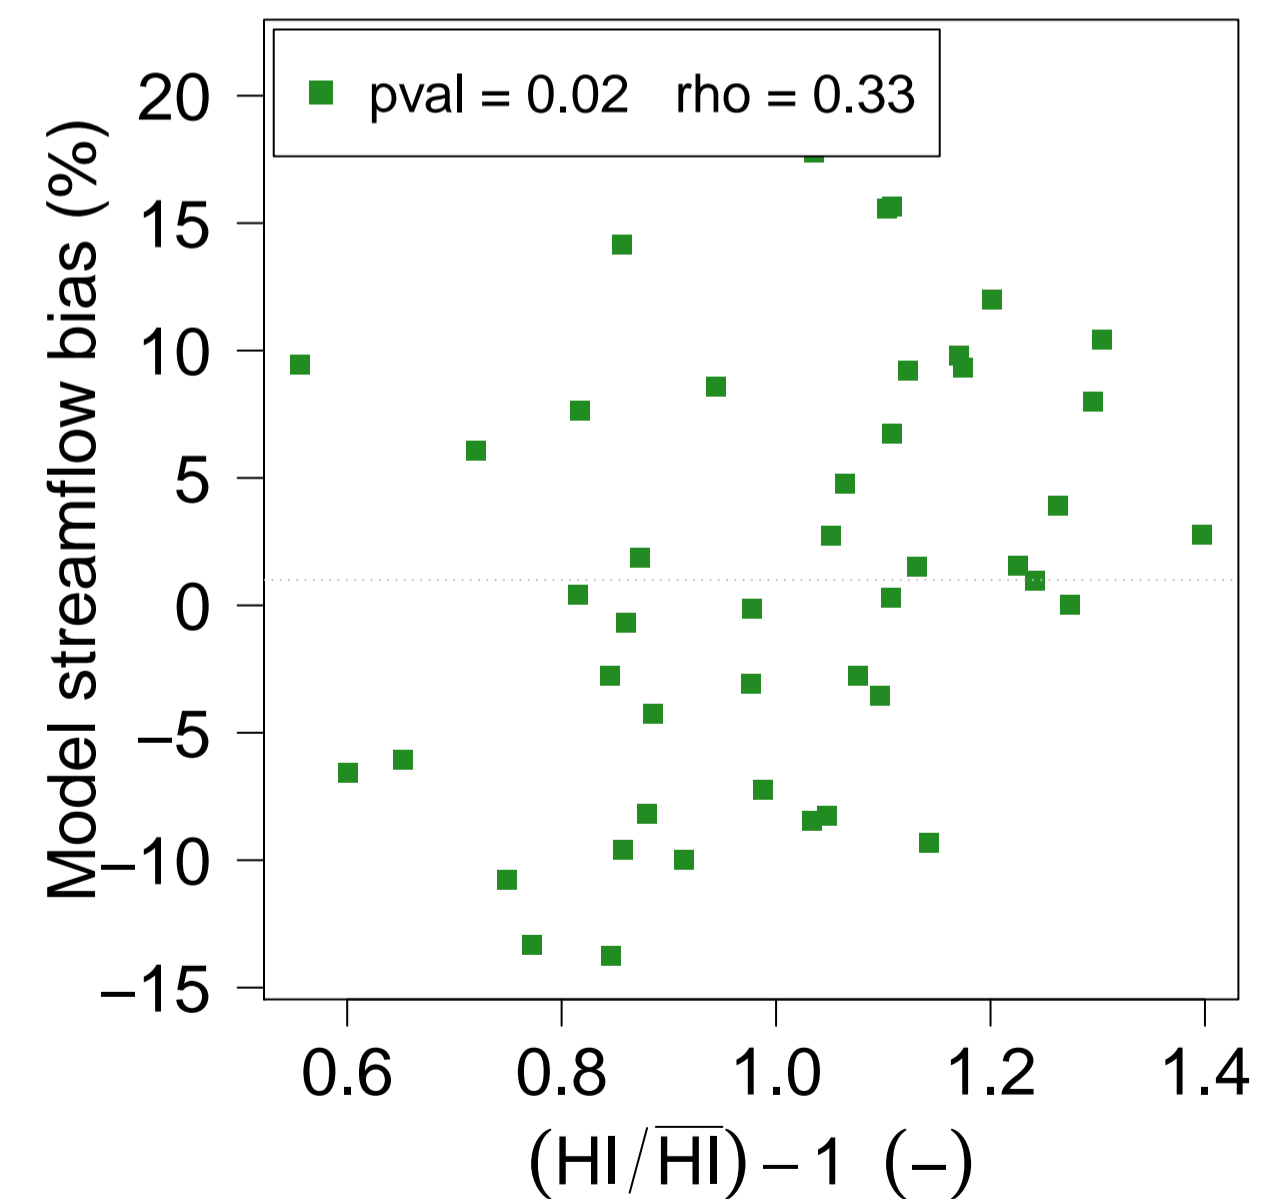

Figure 6. Streamflow annual bias obtained with the RAT function of time (top), temperature absolute anomalies (bottom left) and precipitation  $P$  (bottom centre) and humidity index  $P/E_0$  (bottom right) anomalies, for the catchment H8212010

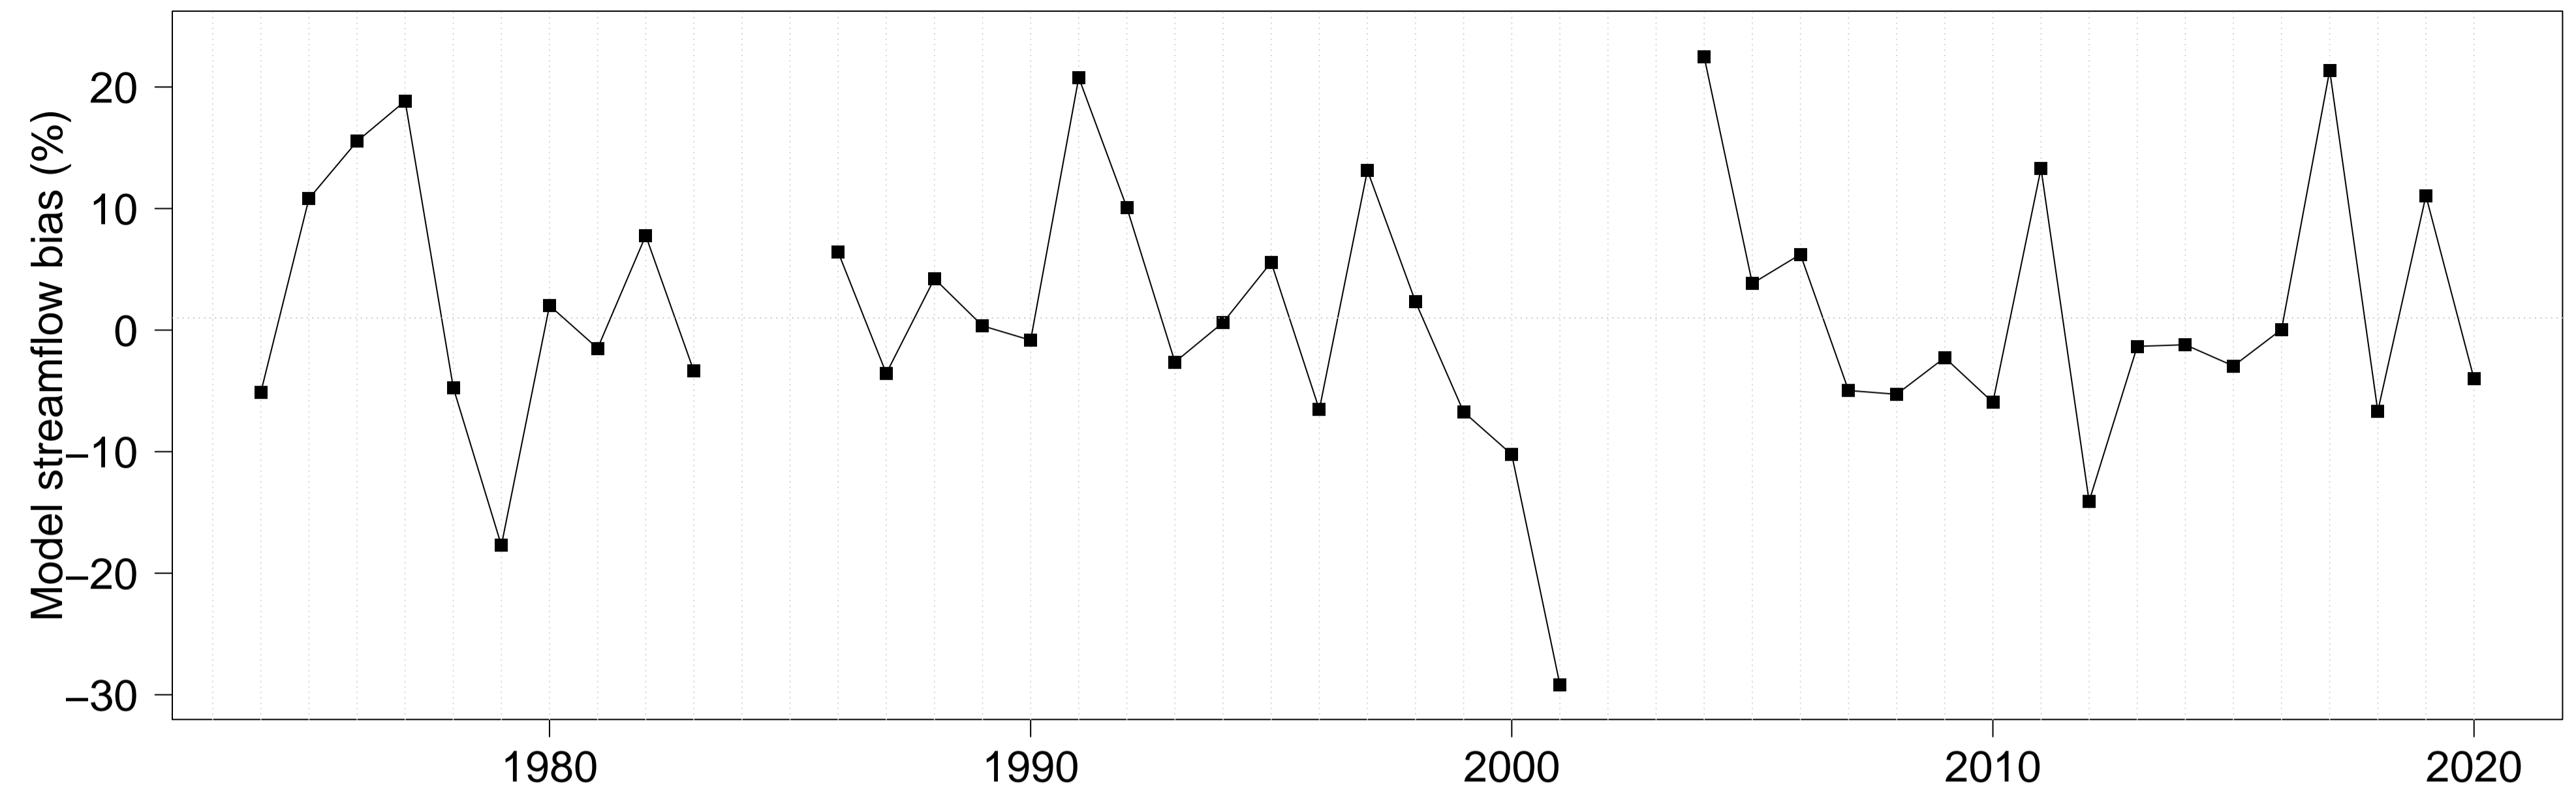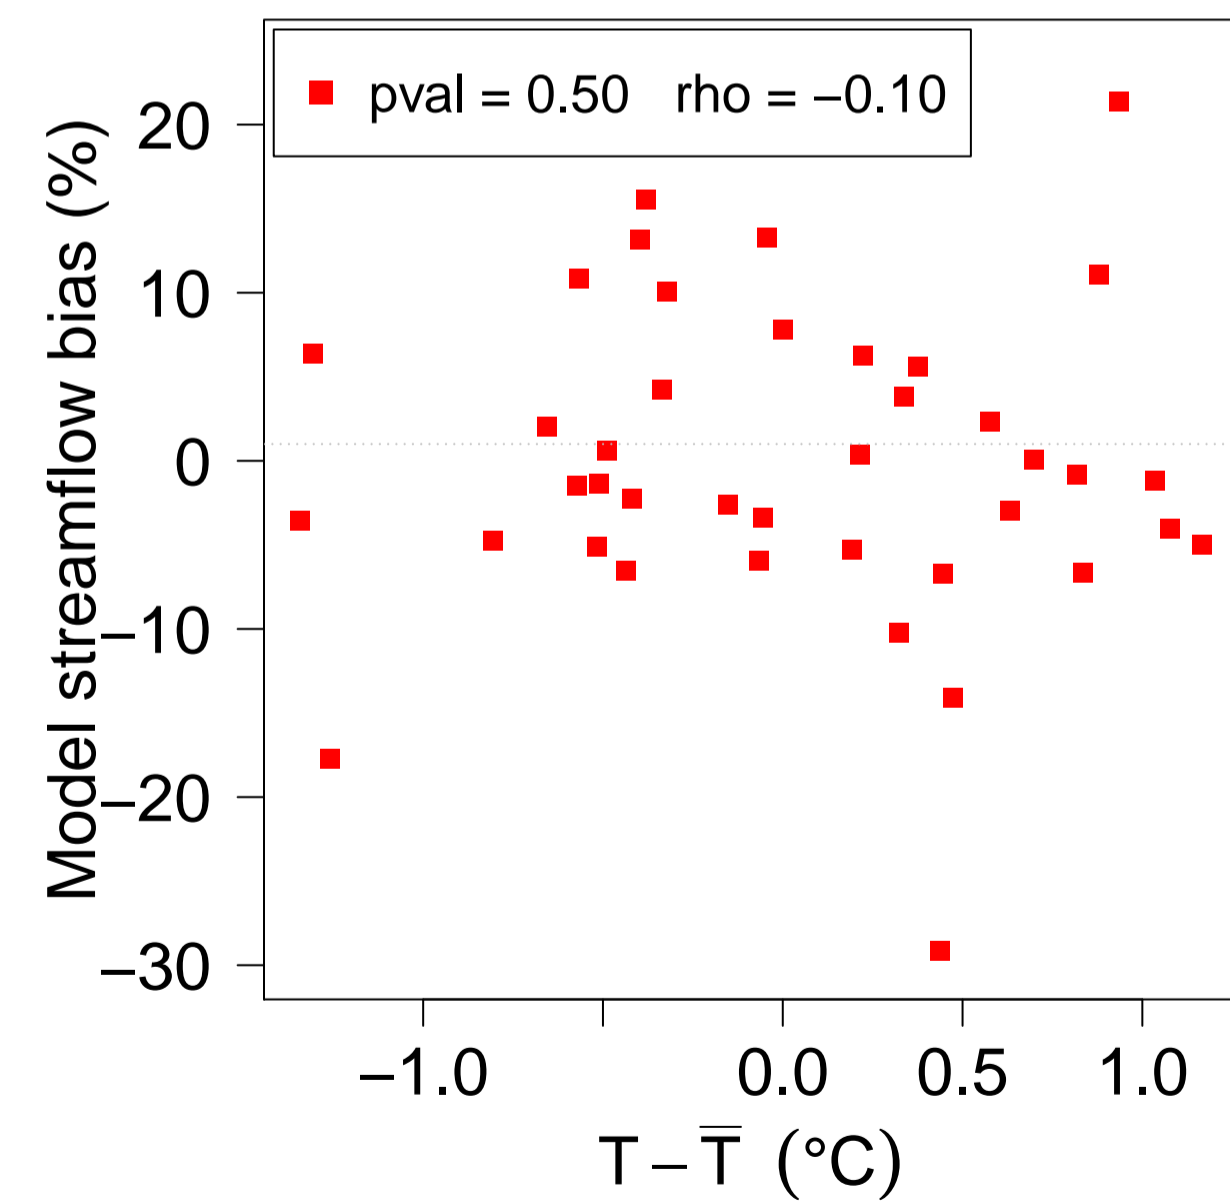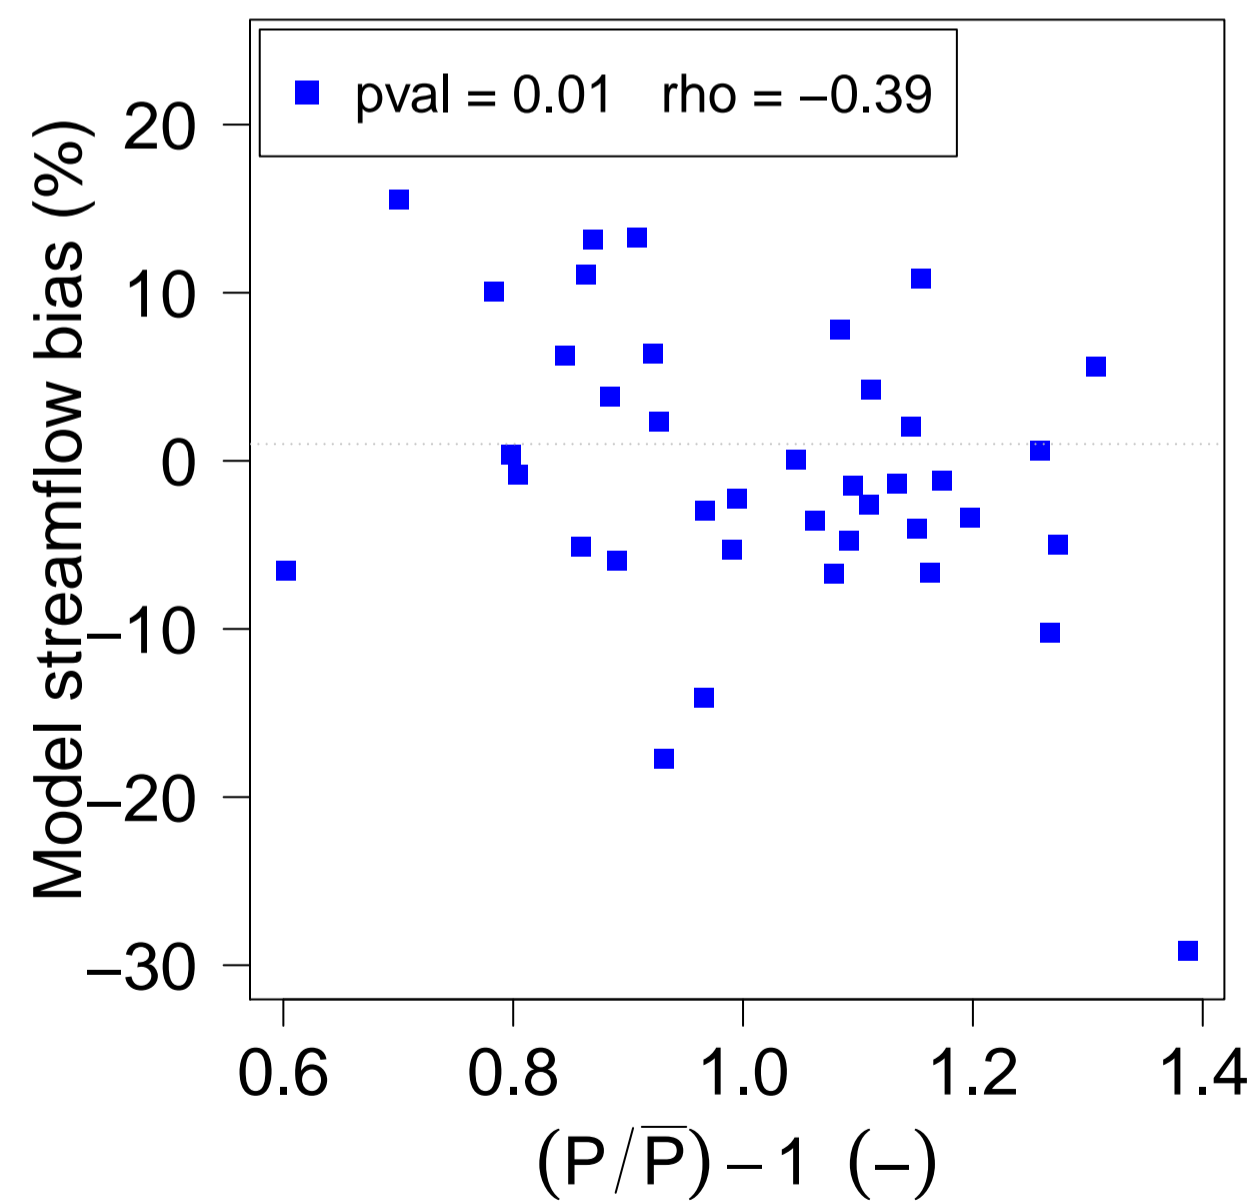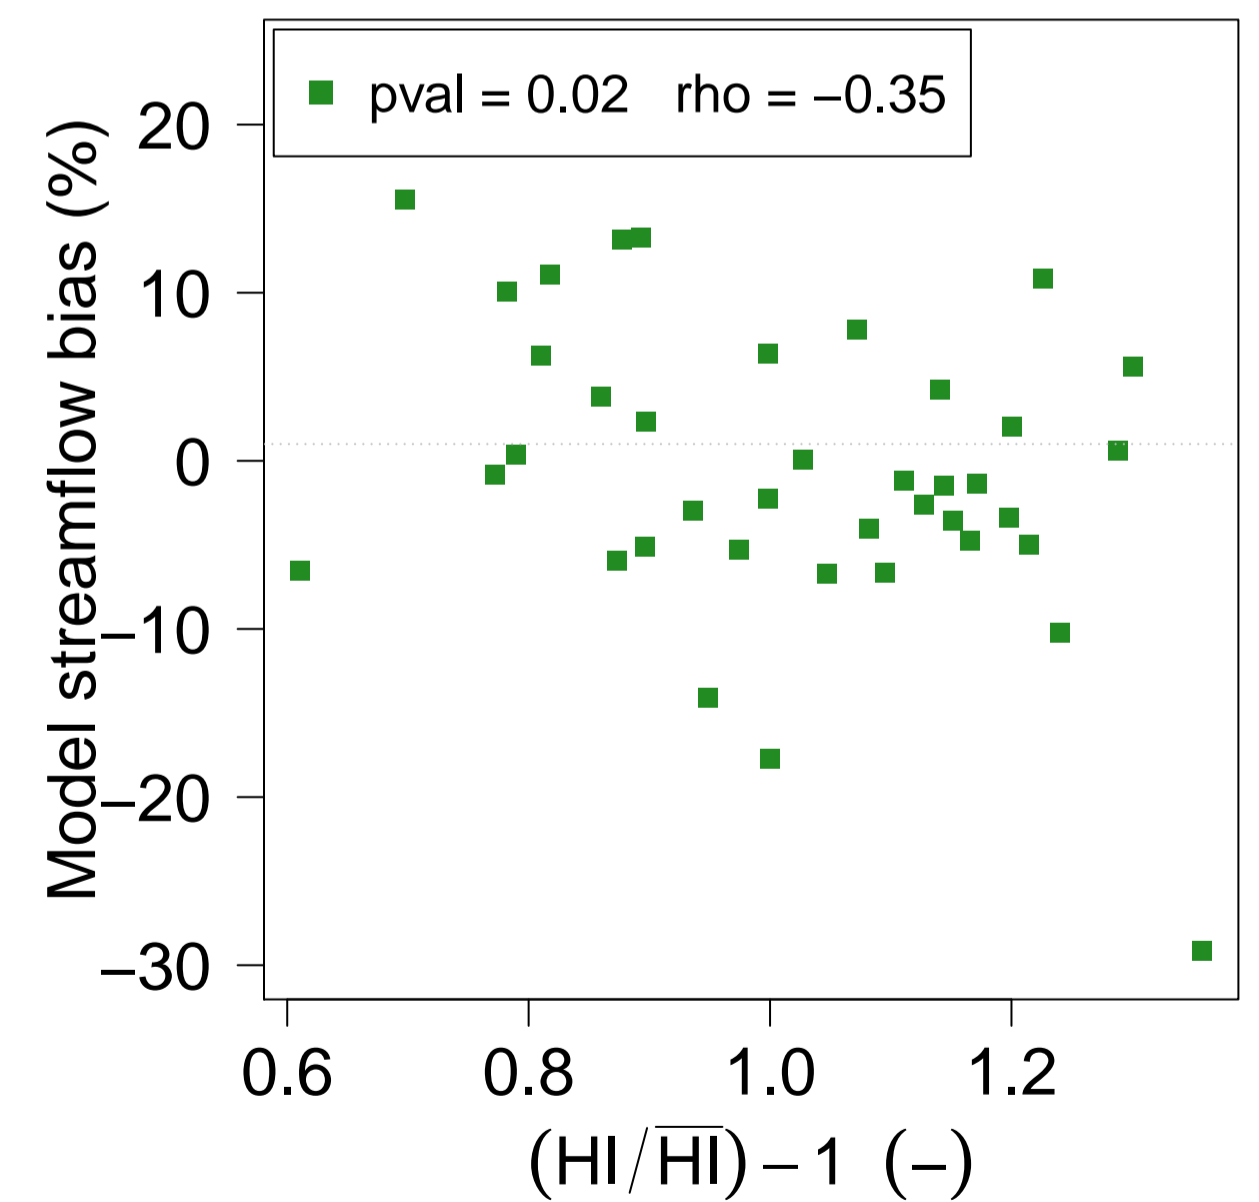

Figure 7. Streamflow annual bias obtained with the RAT function of time (top), temperature absolute anomalies (bottom left) and precipitation  $P$  (bottom centre) and humidity index  $P/E_0$  (bottom right) anomalies, for the catchment I5221010

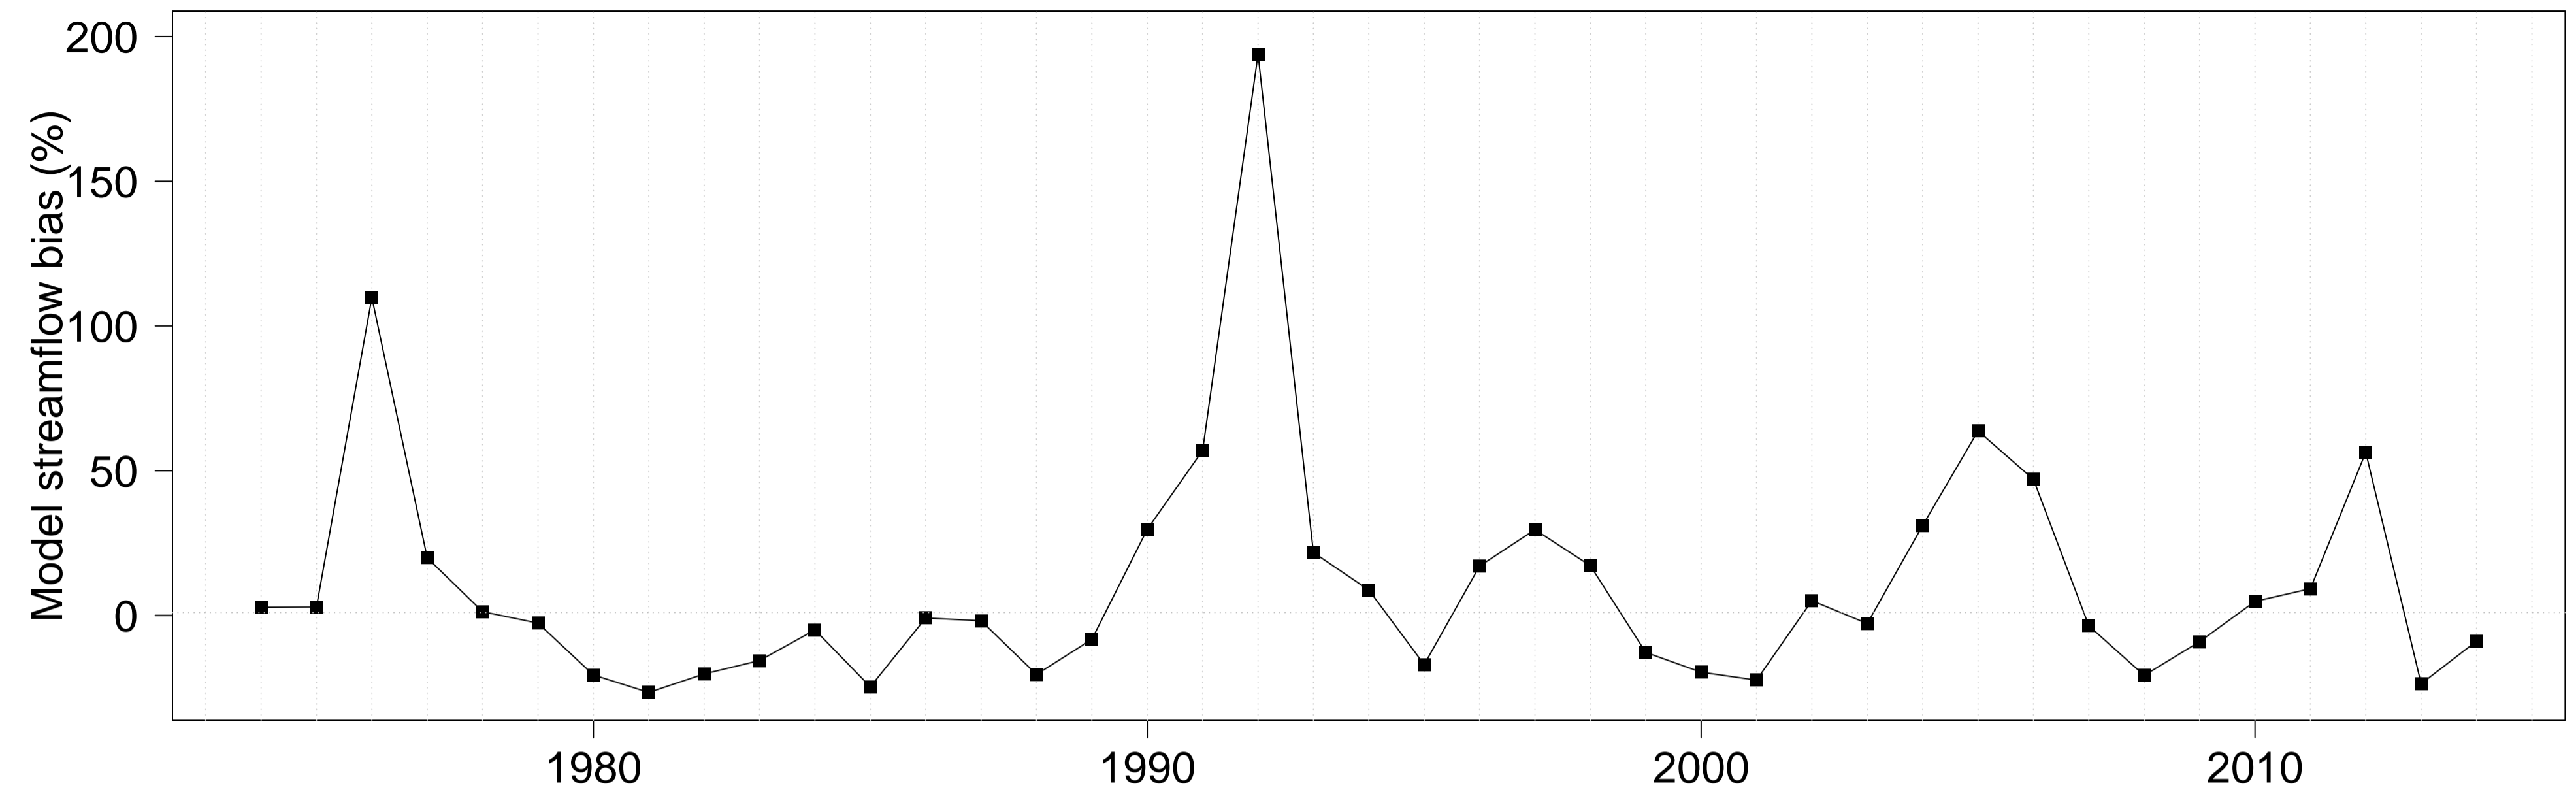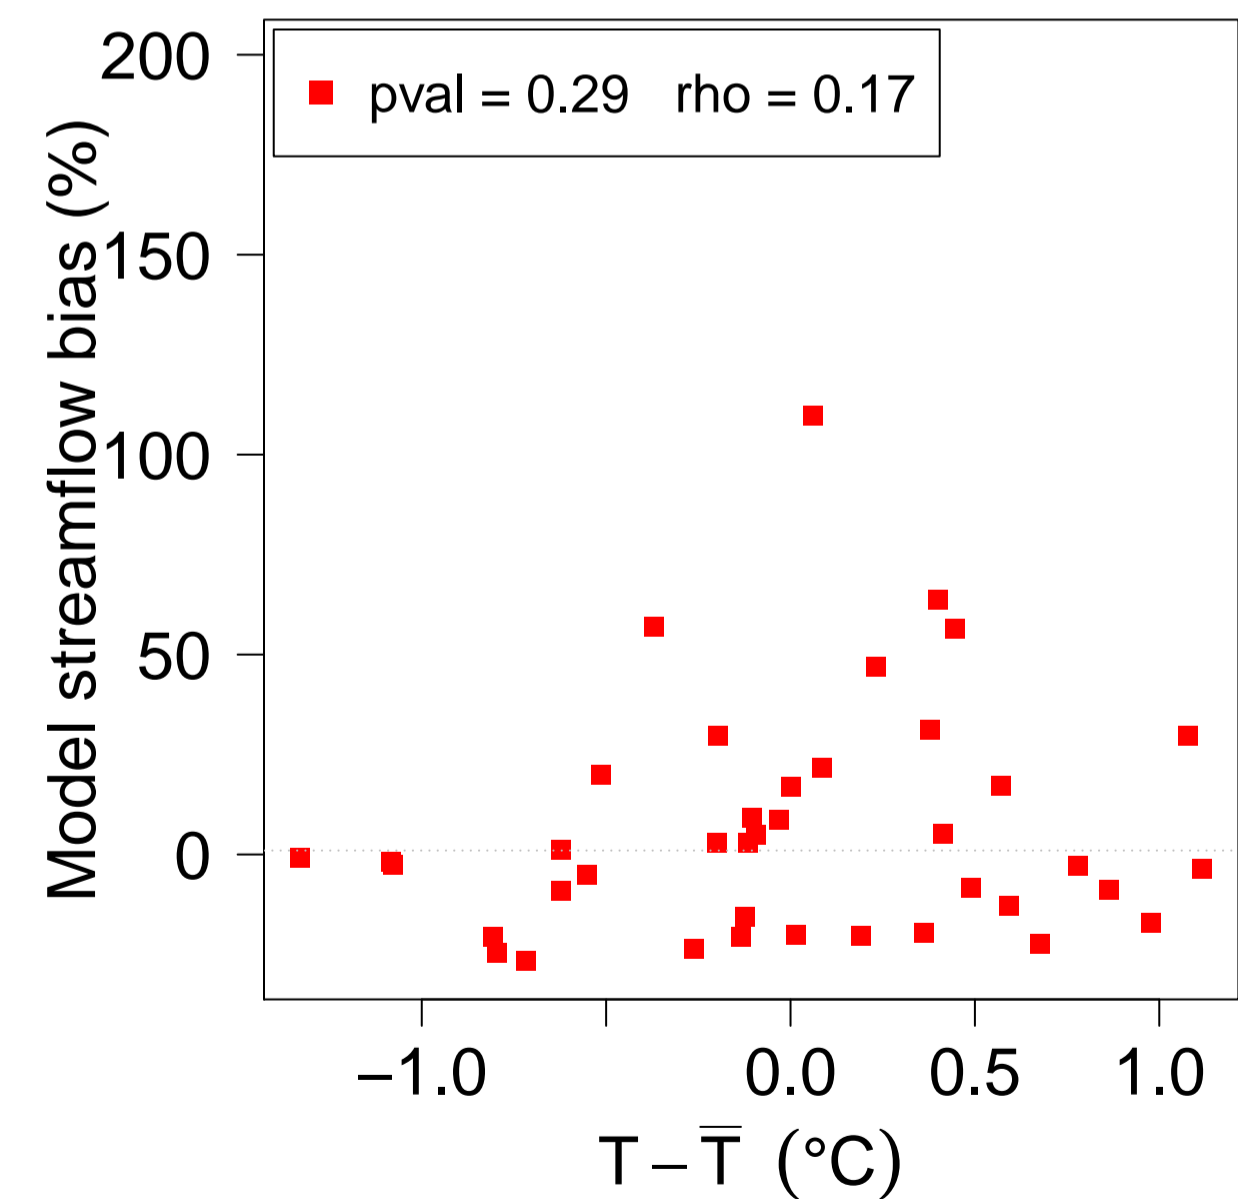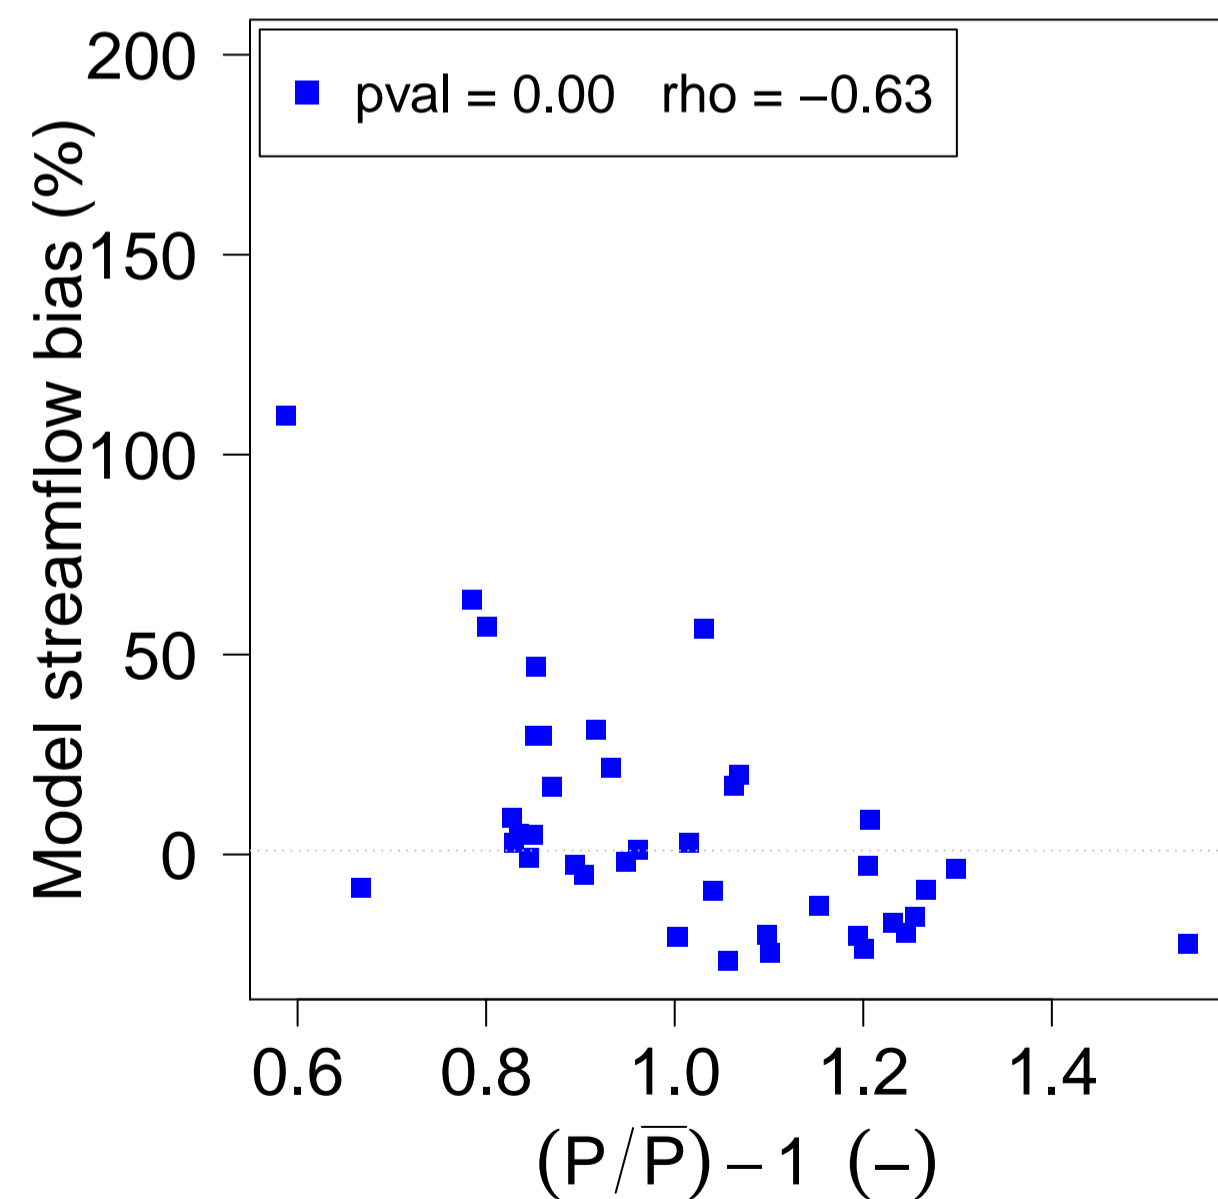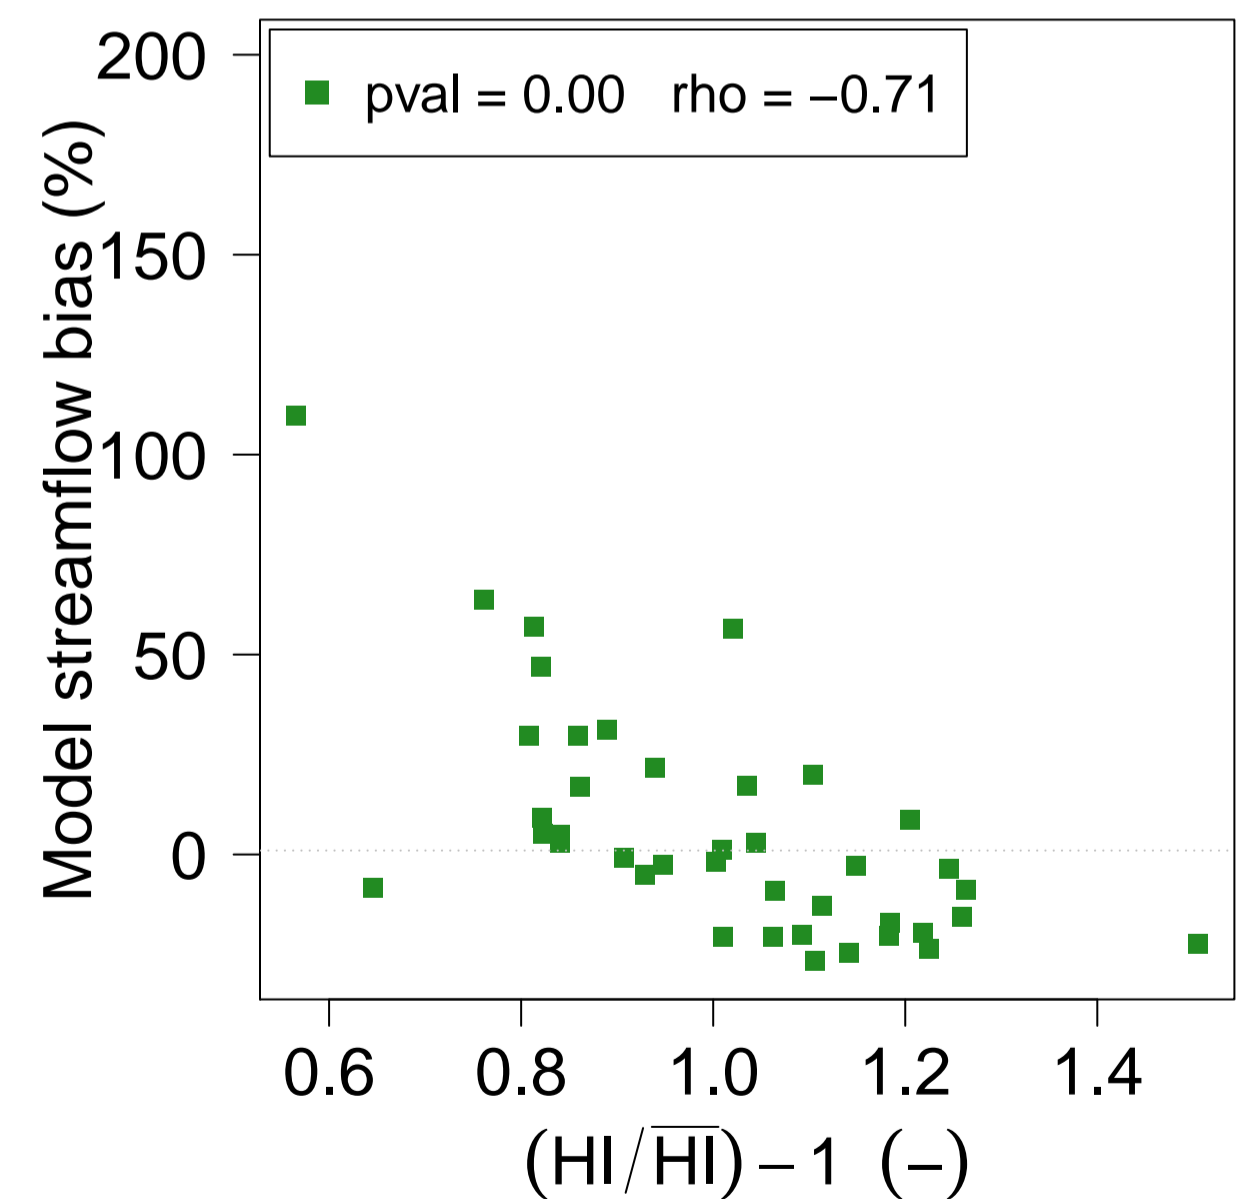

Figure 8. Streamflow annual bias obtained with the RAT function of time (top), temperature absolute anomalies (bottom left) and precipitation  $P$  (bottom centre) and humidity index  $P/E_0$  (bottom right) anomalies, for the catchment J7483010

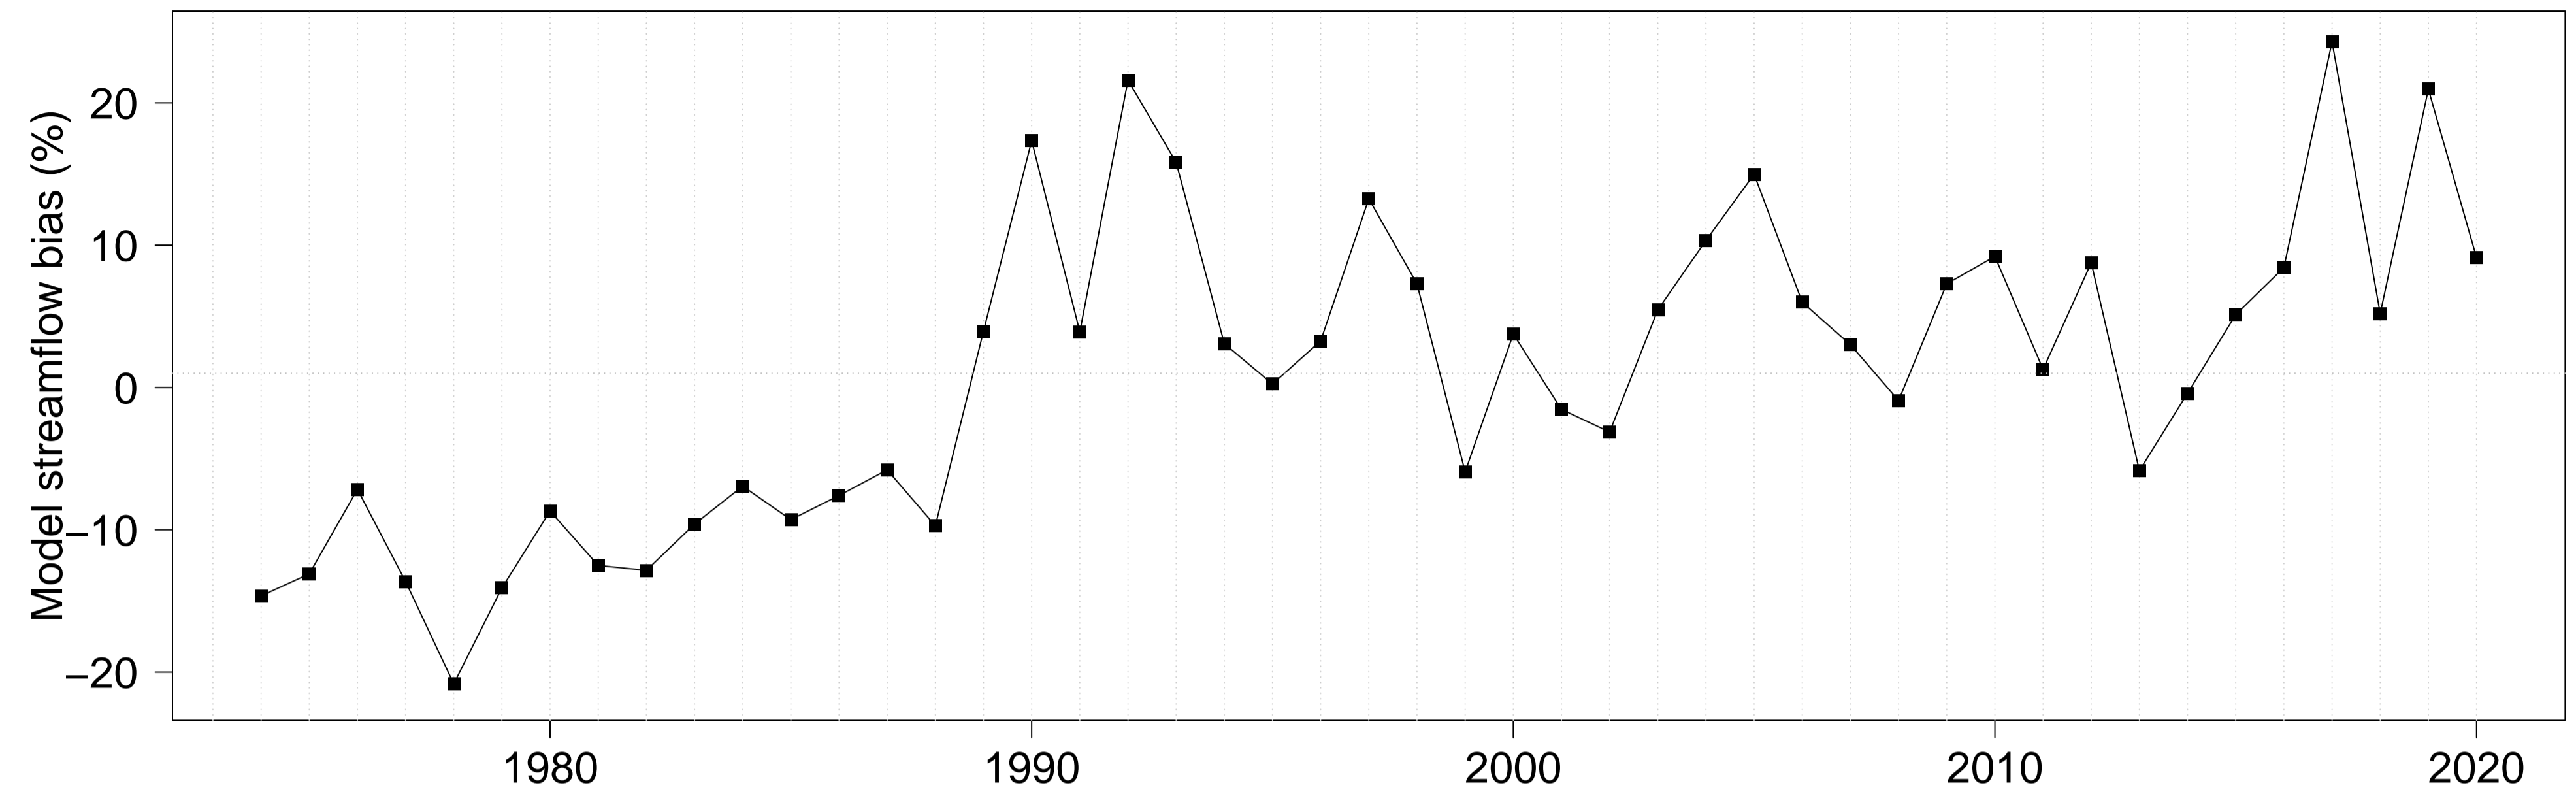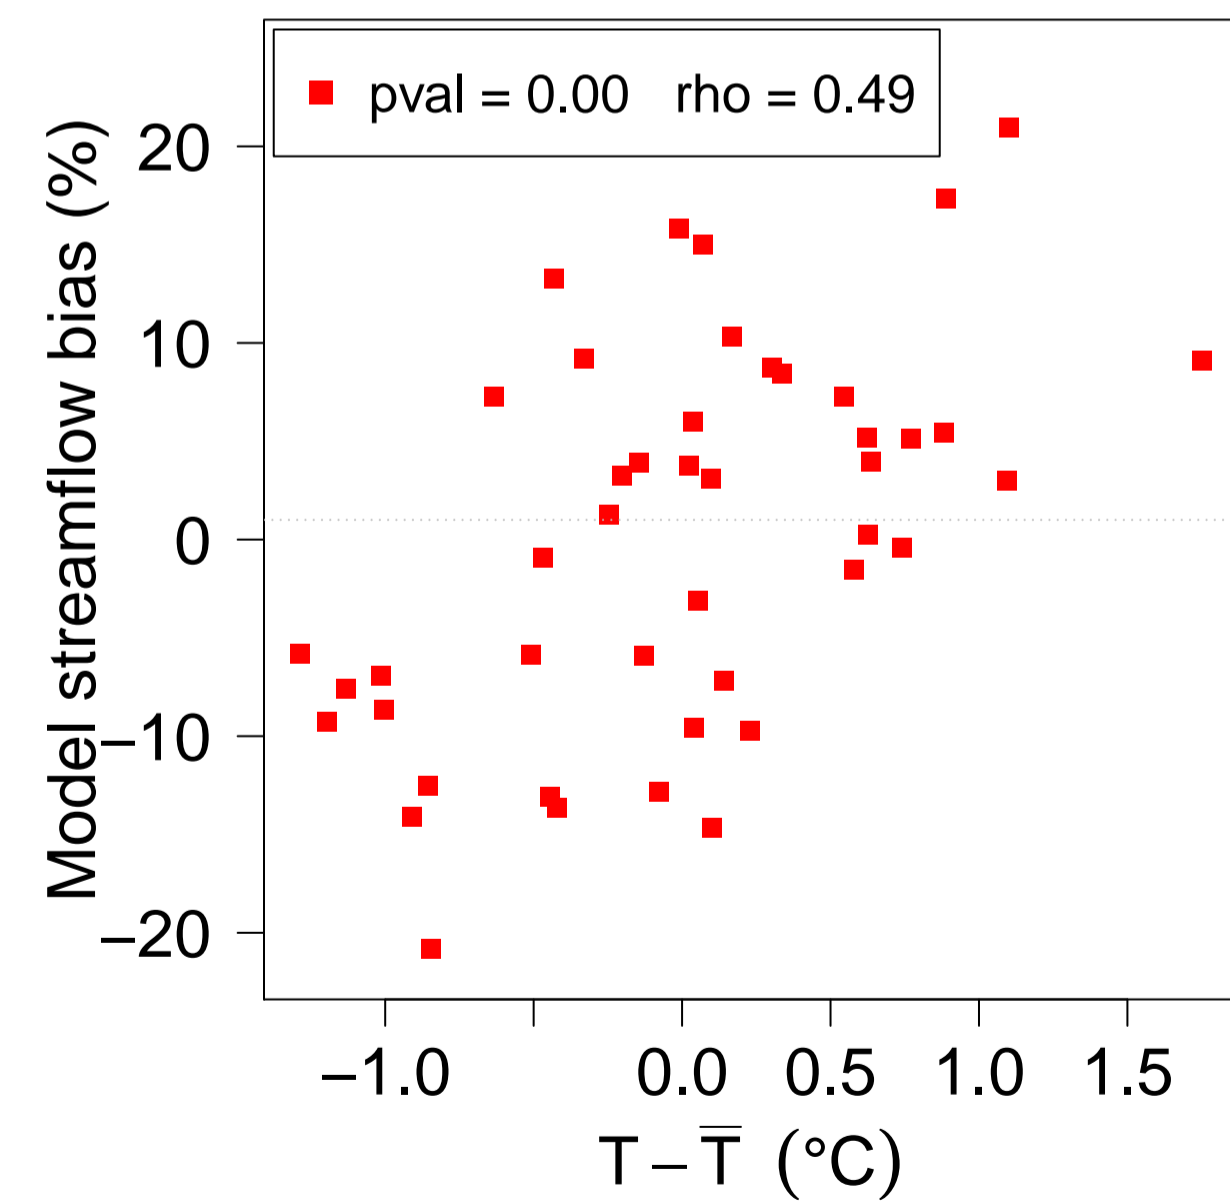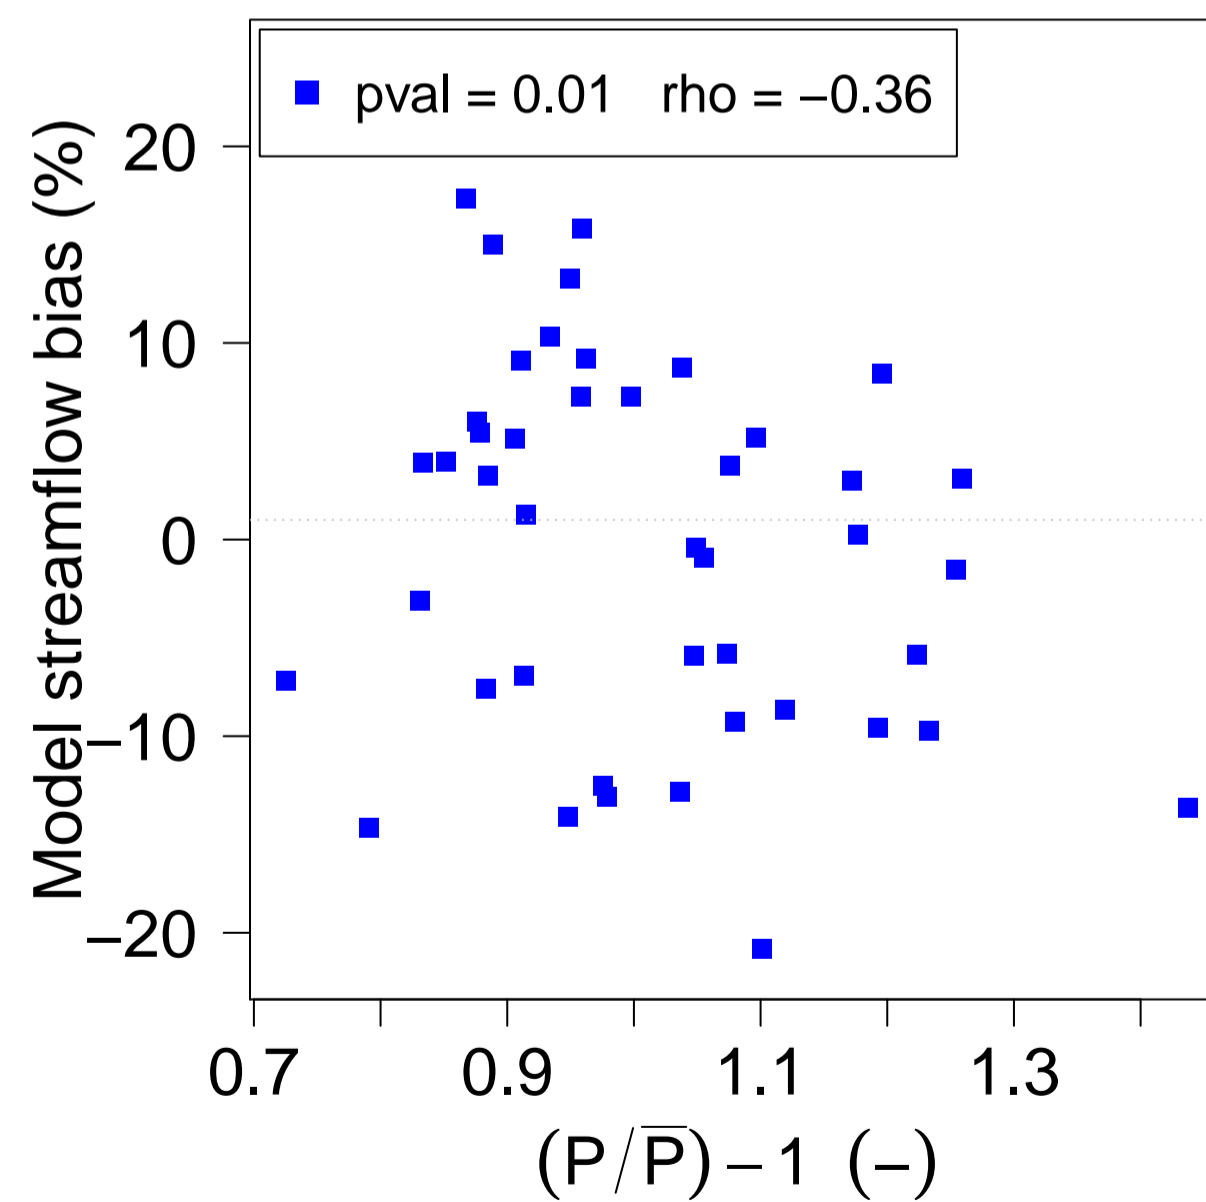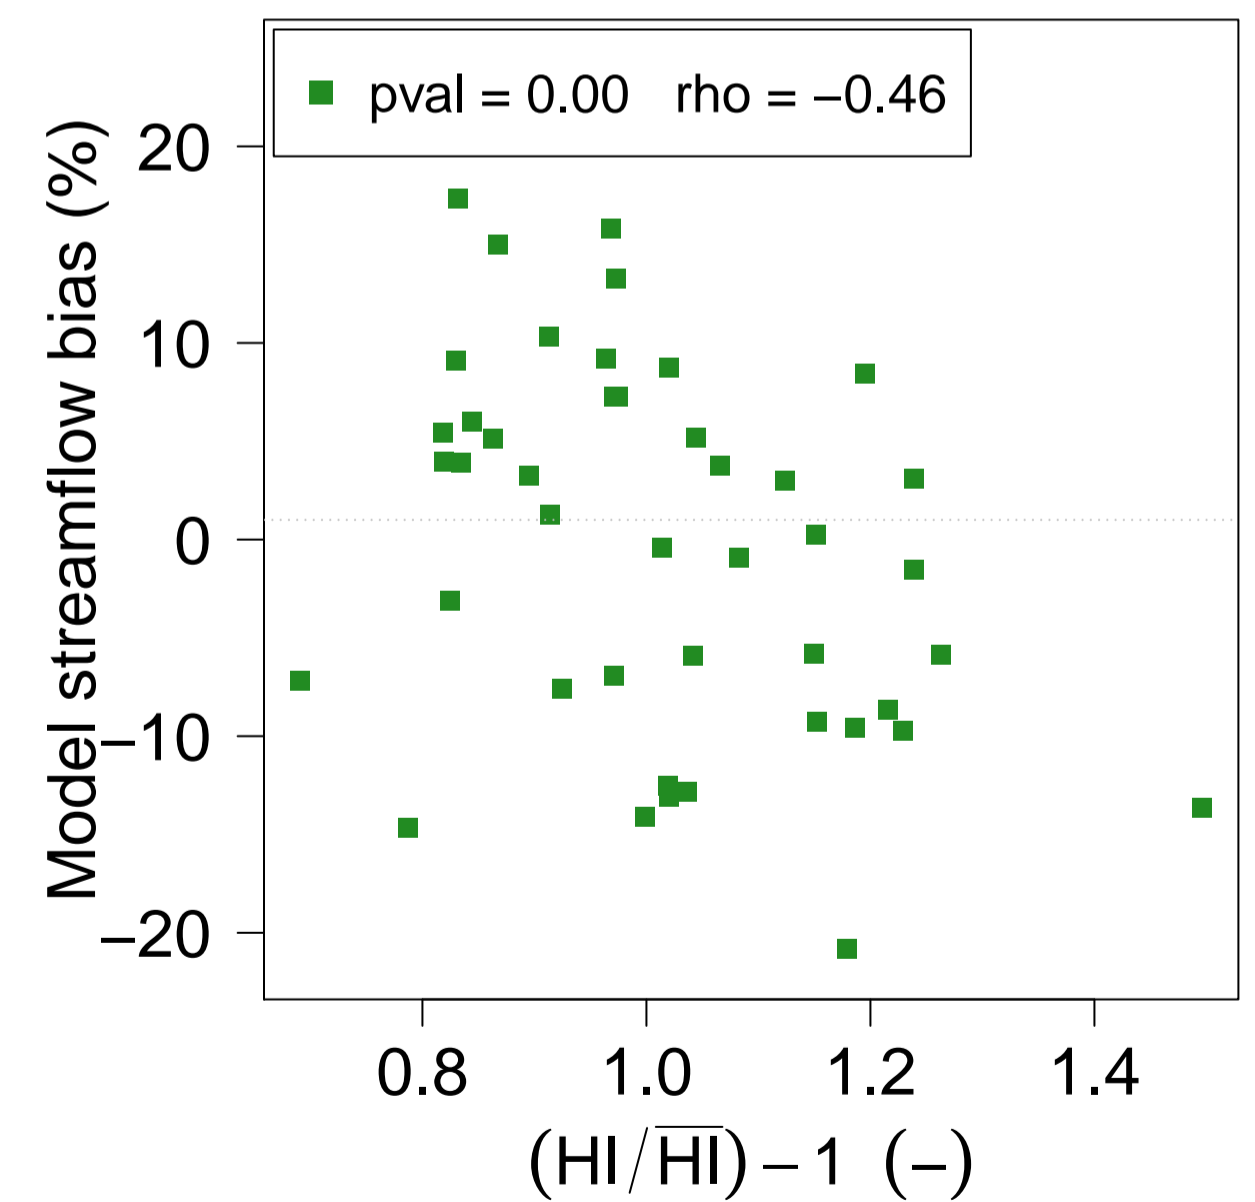

Figure 9. Streamflow annual bias obtained with the RAT function of time (top), temperature absolute anomalies (bottom left) and precipitation  $P$  (bottom centre) and humidity index  $P/E_0$  (bottom right) anomalies, for the catchment K1321810



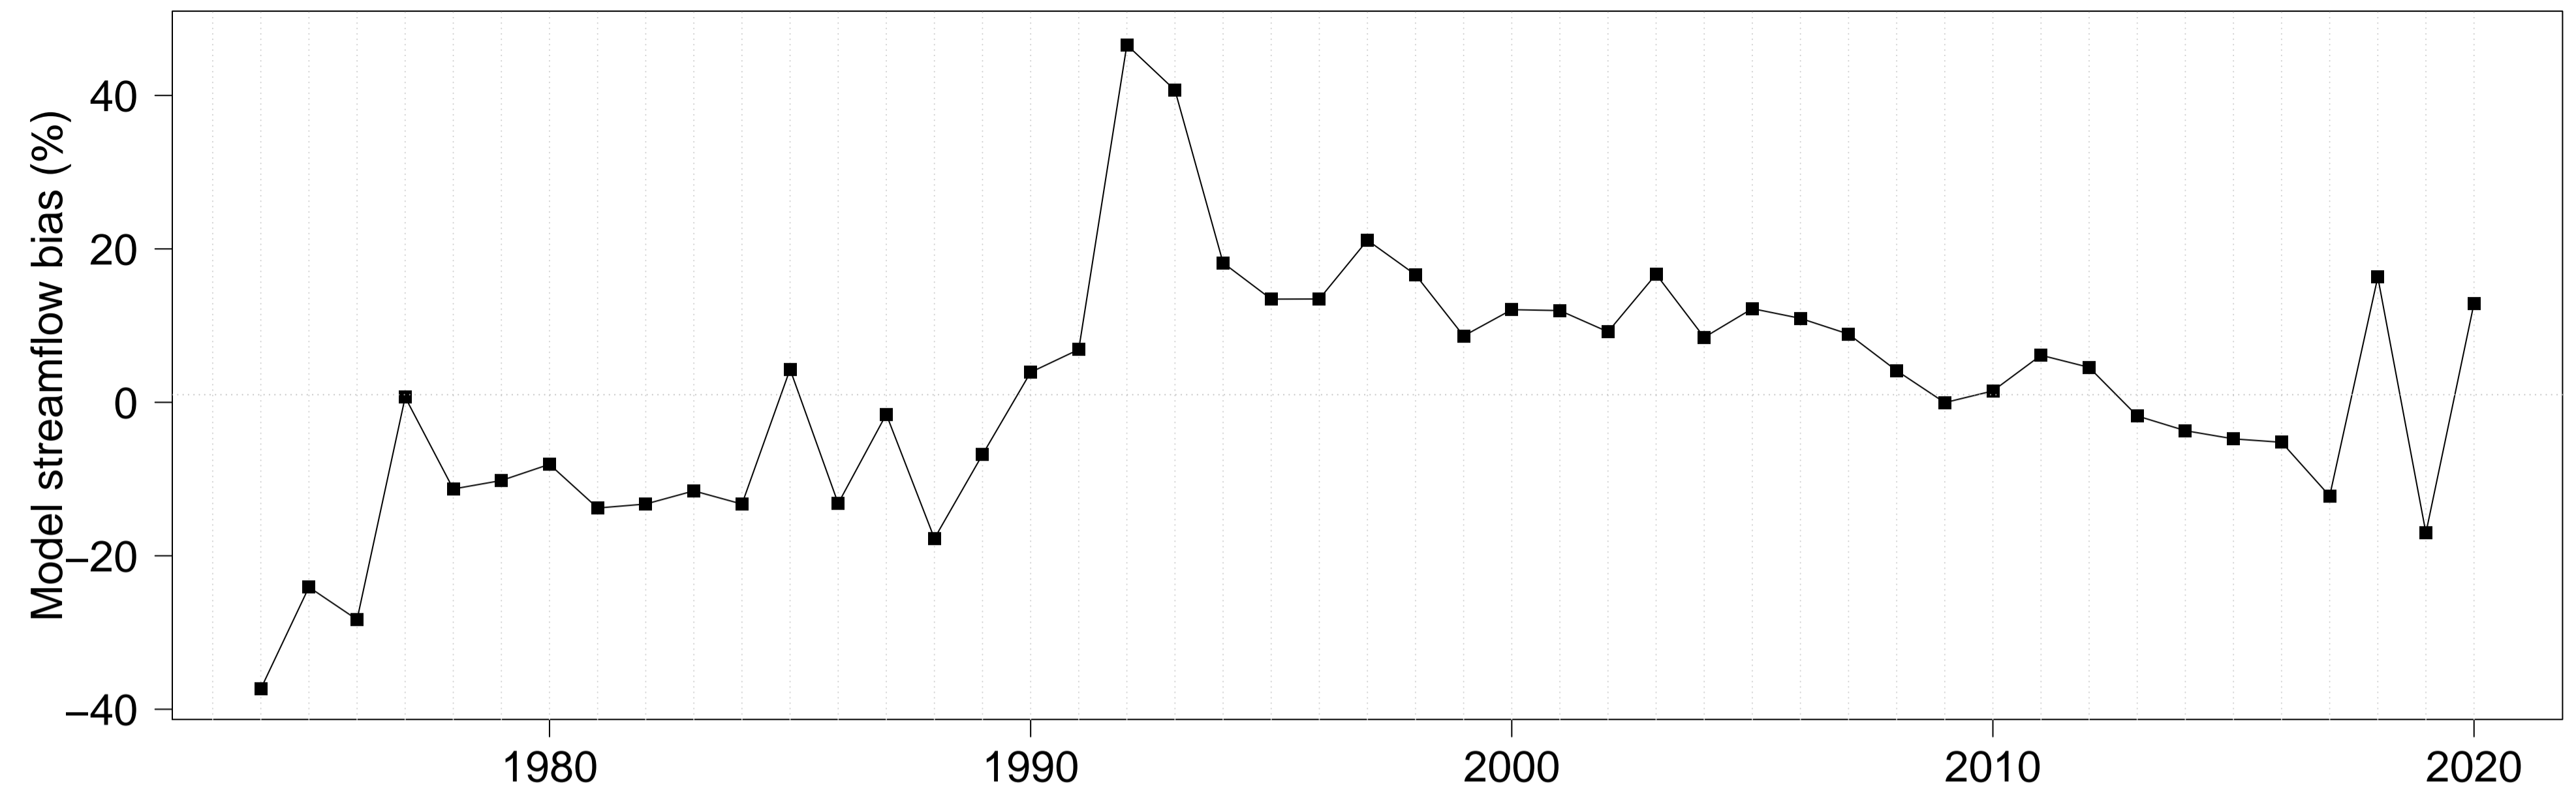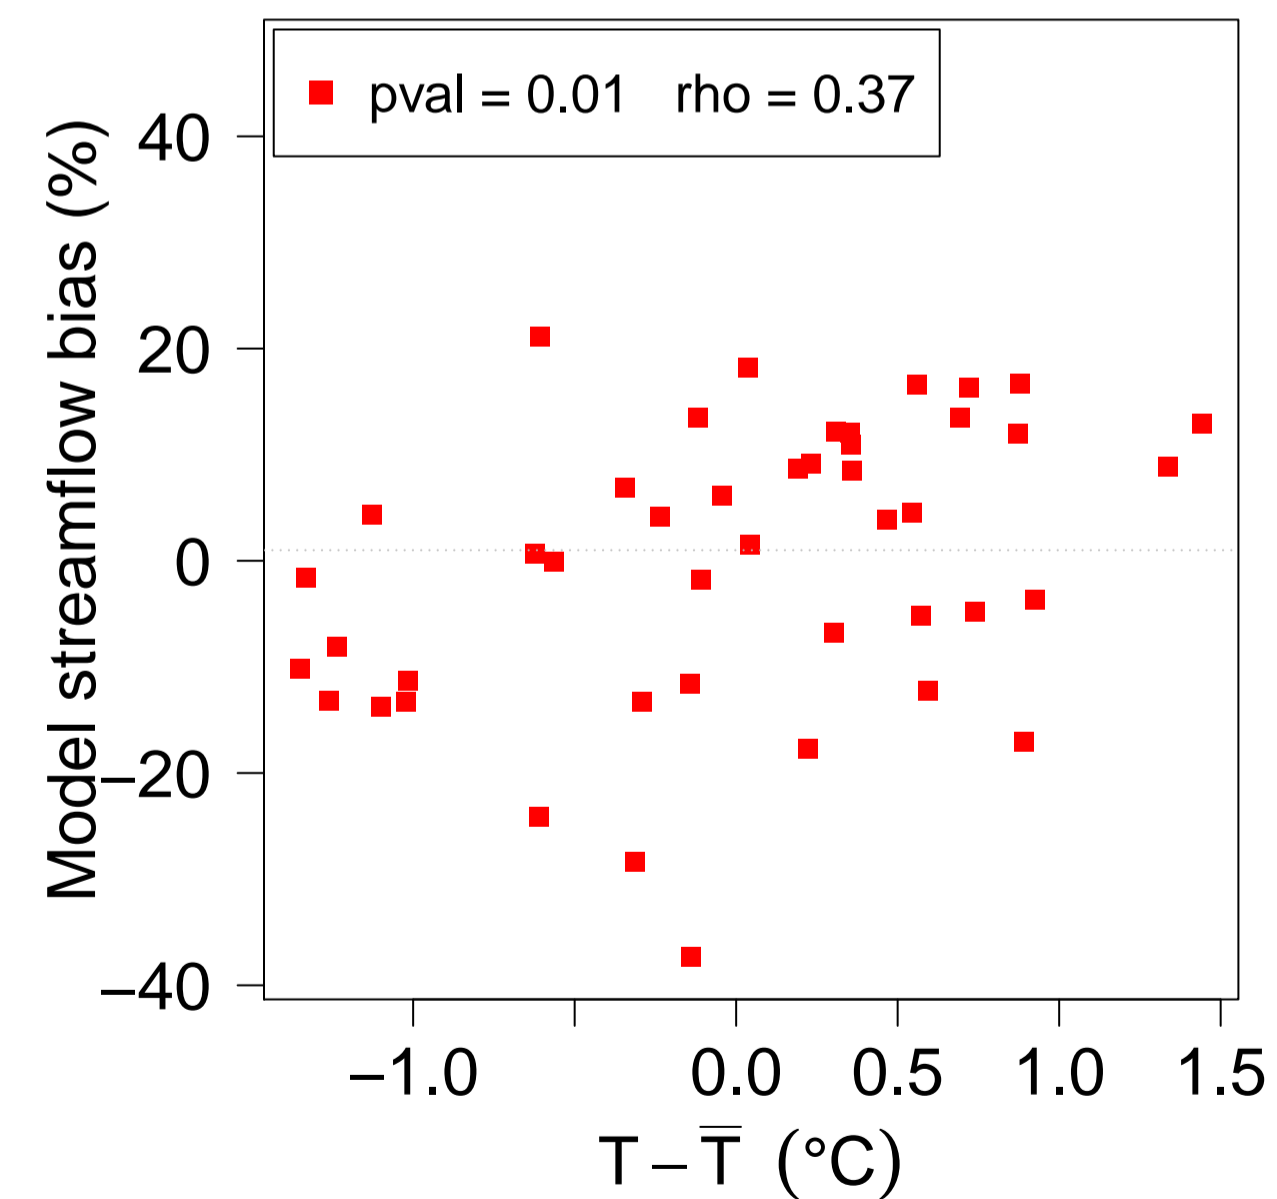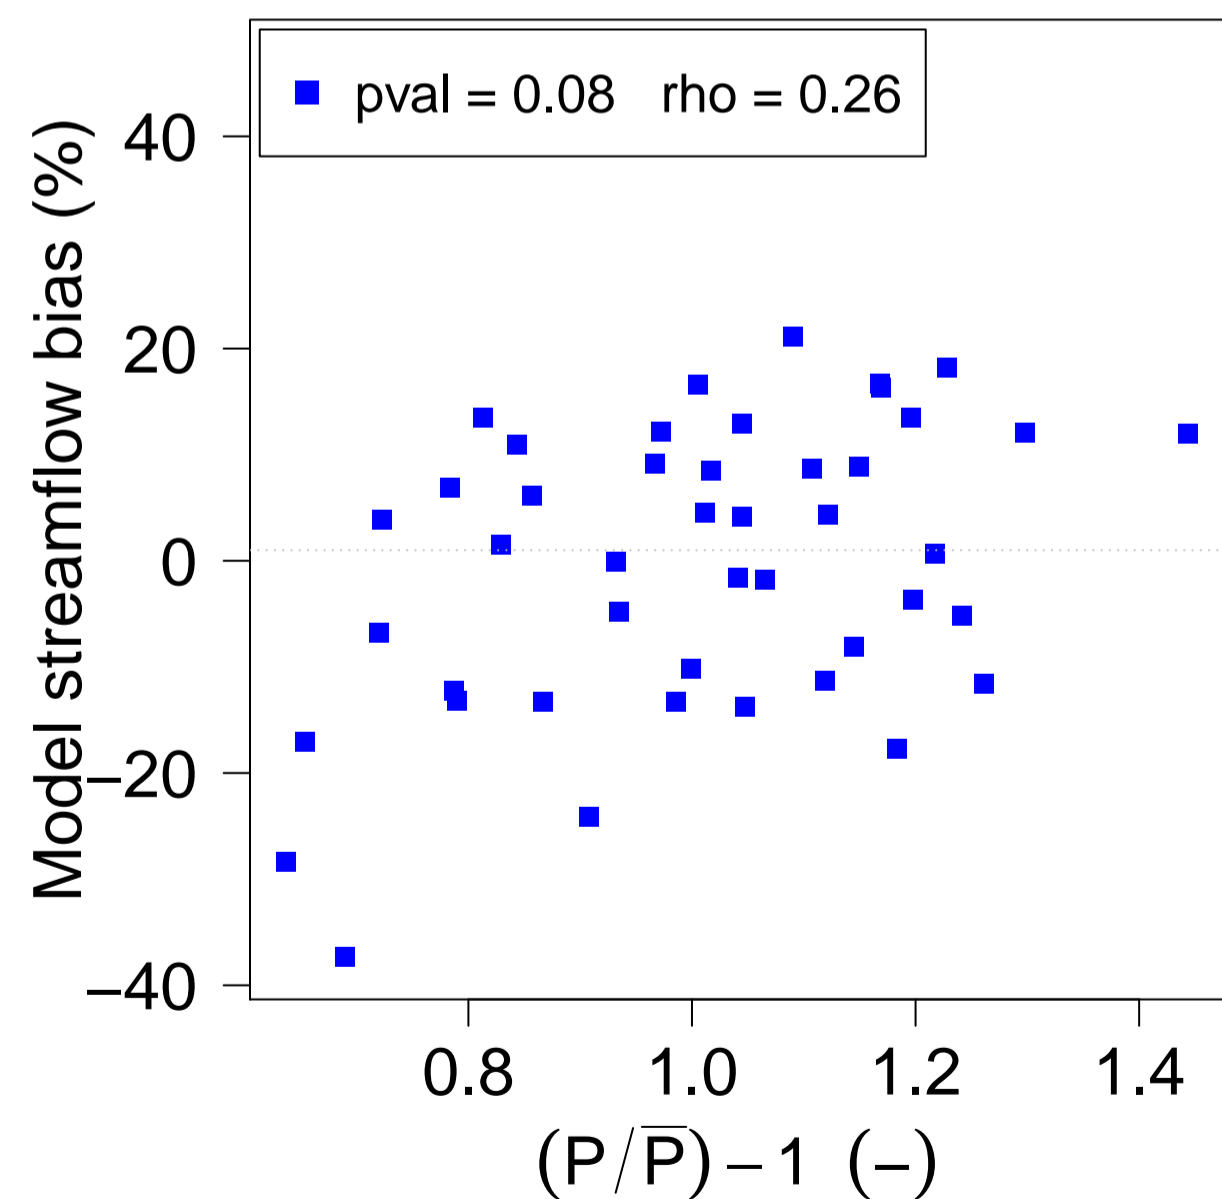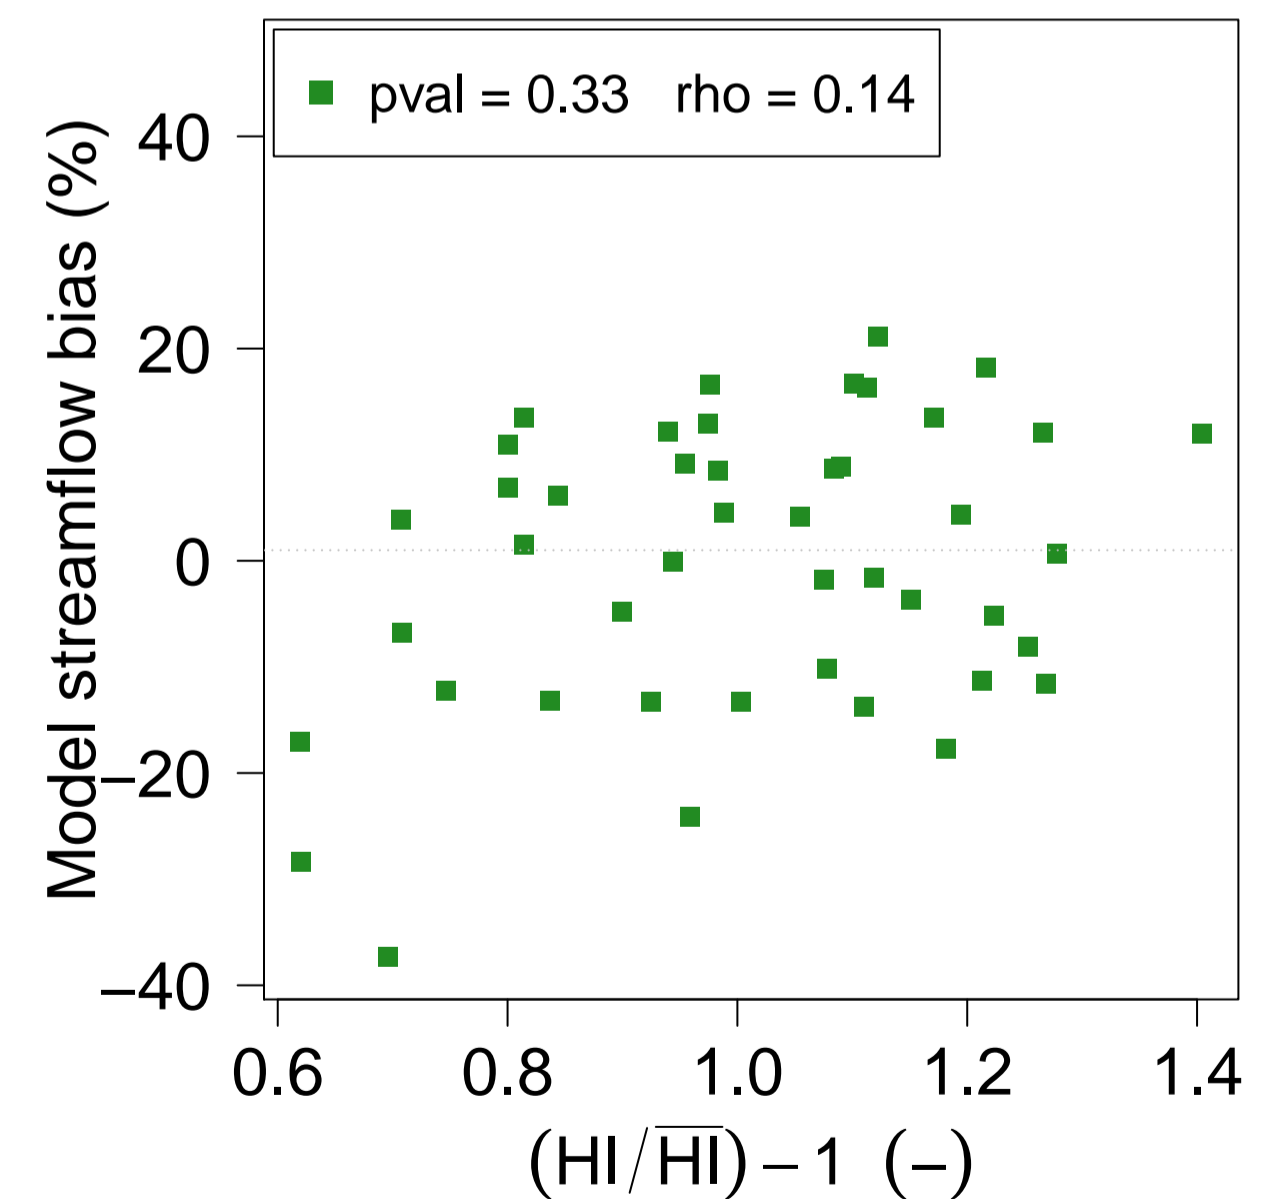

Figure 10. Streamflow annual bias obtained with the RAT function of time (top), temperature absolute anomalies (bottom left) and precipitation  $P$  (bottom centre) and humidity index  $P/E_0$  (bottom right) anomalies, for the catchment K6402520

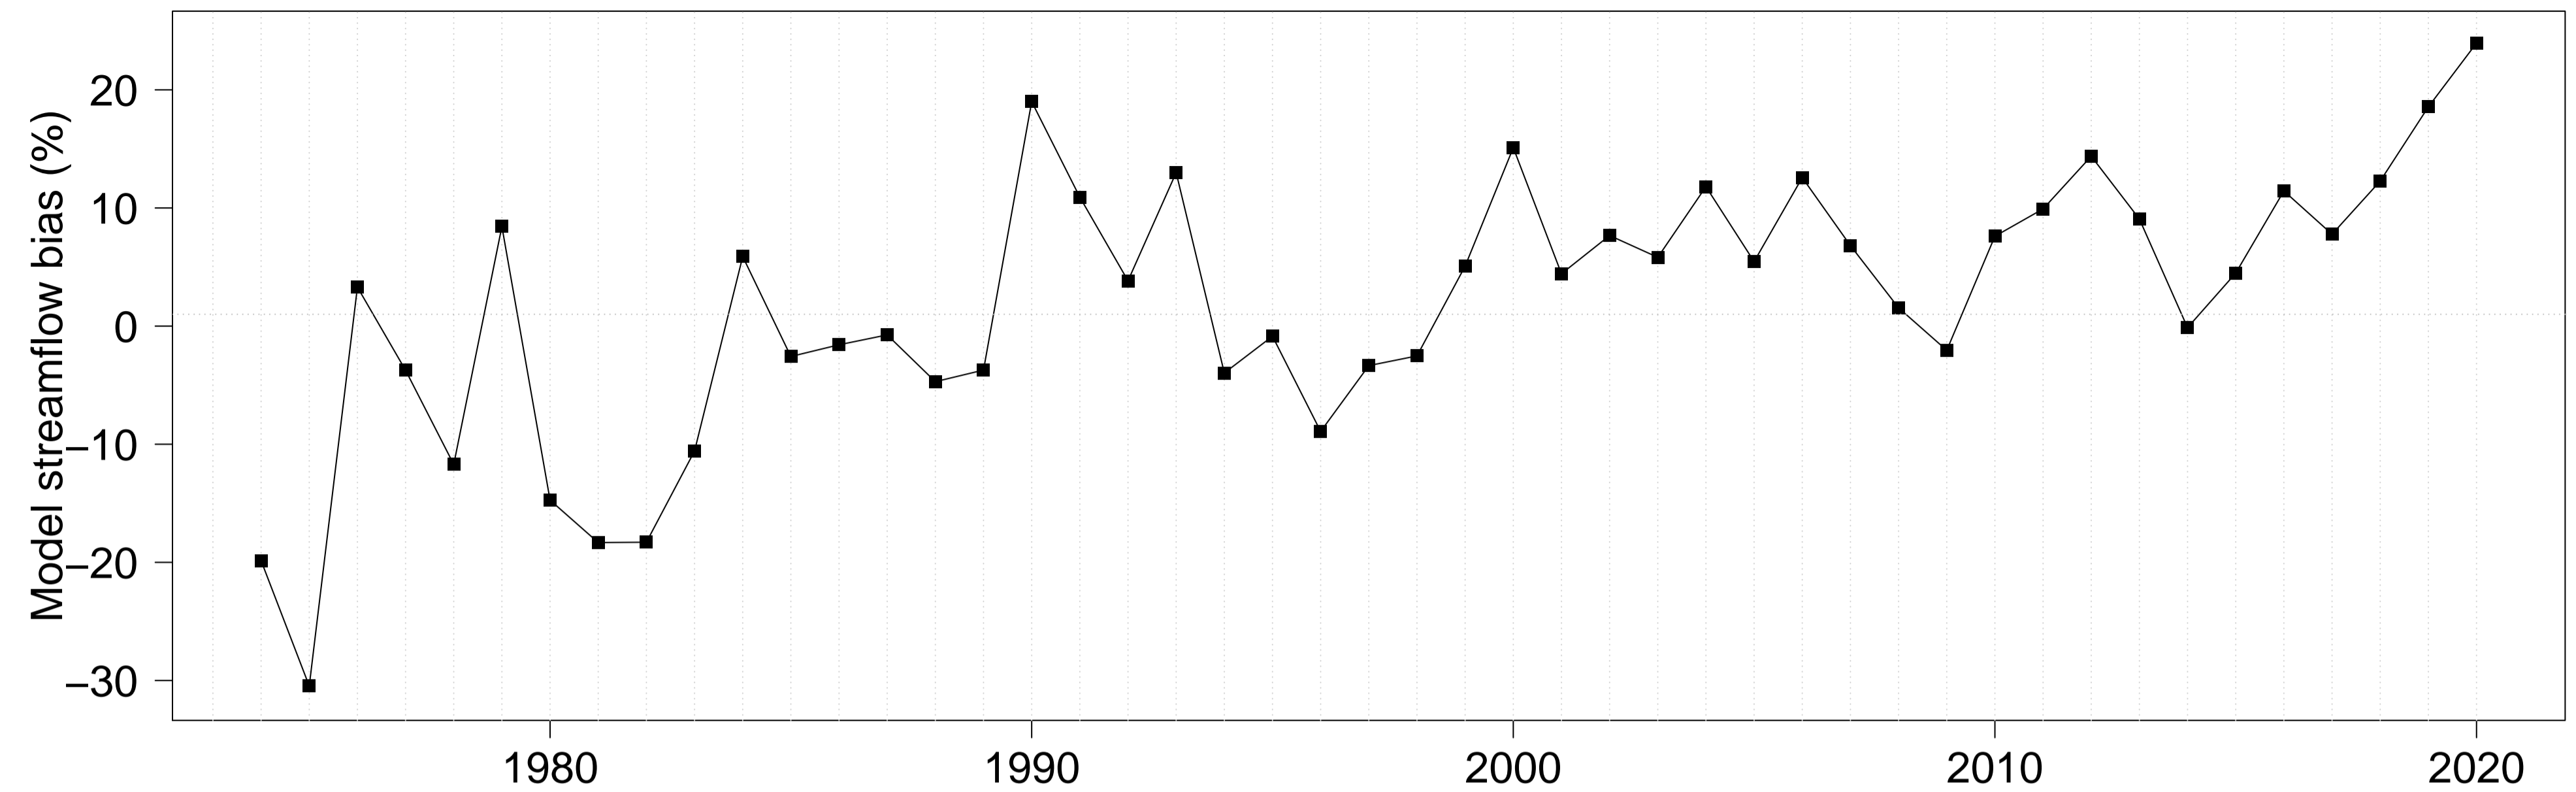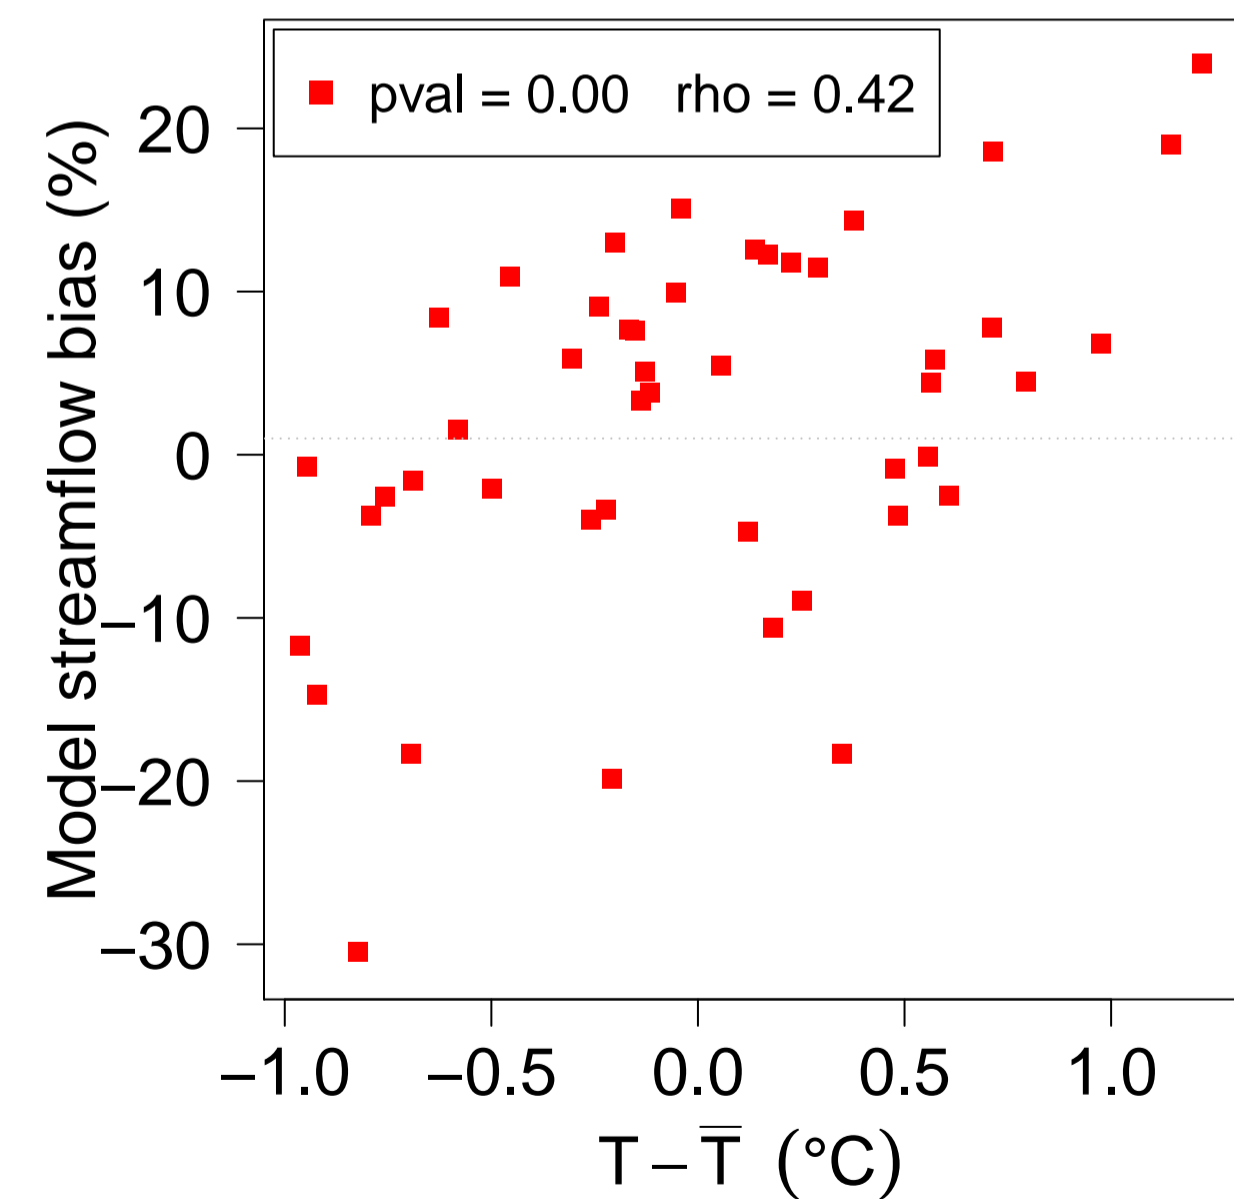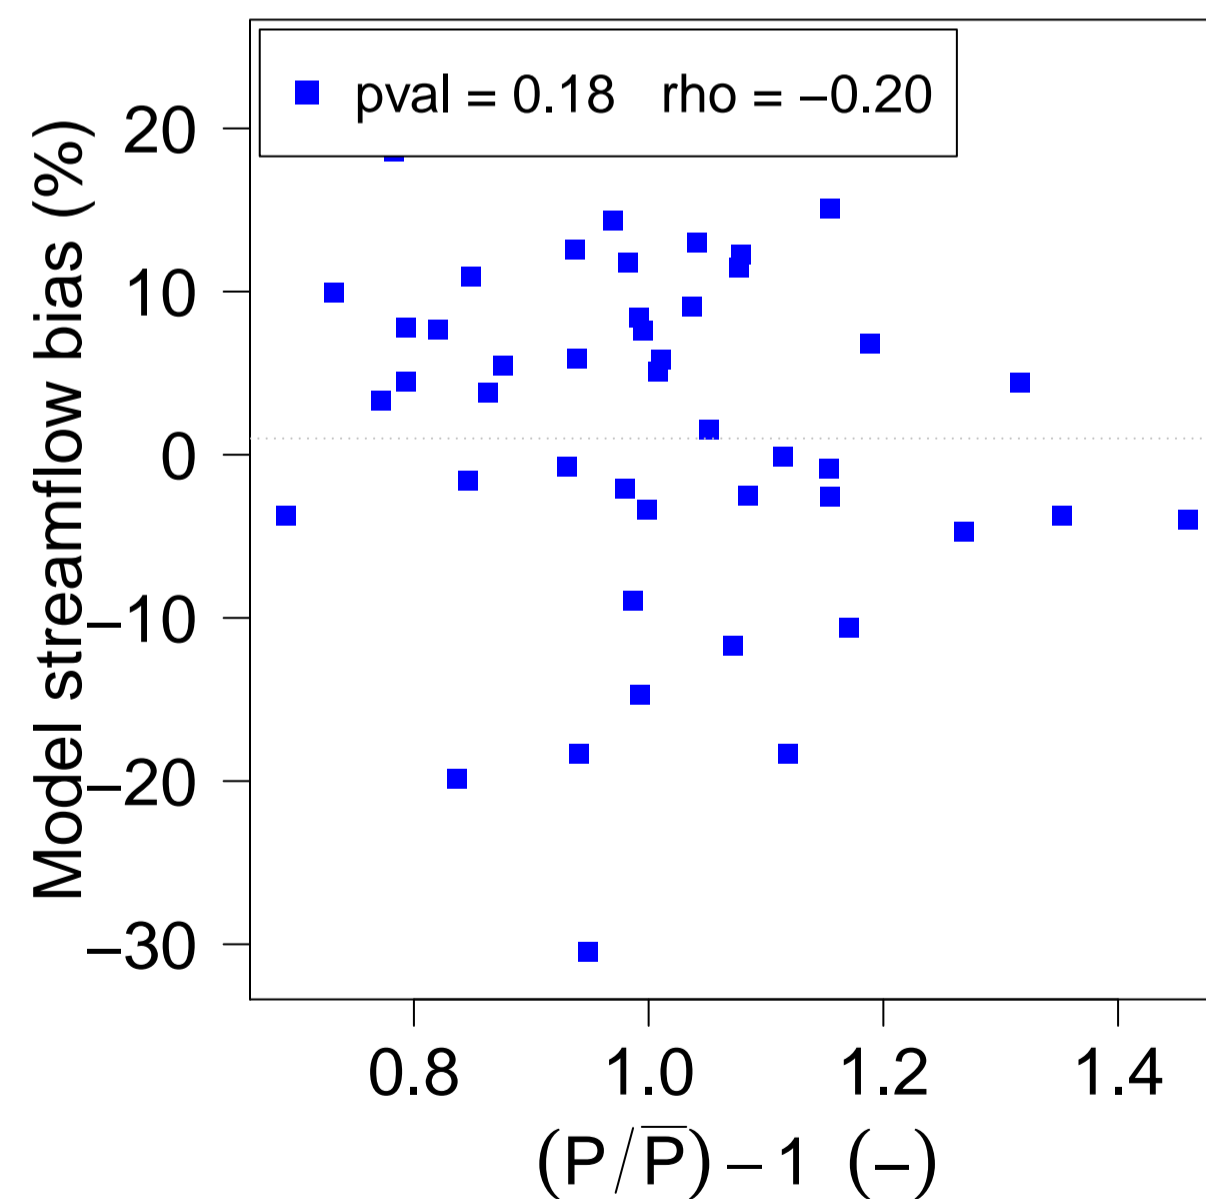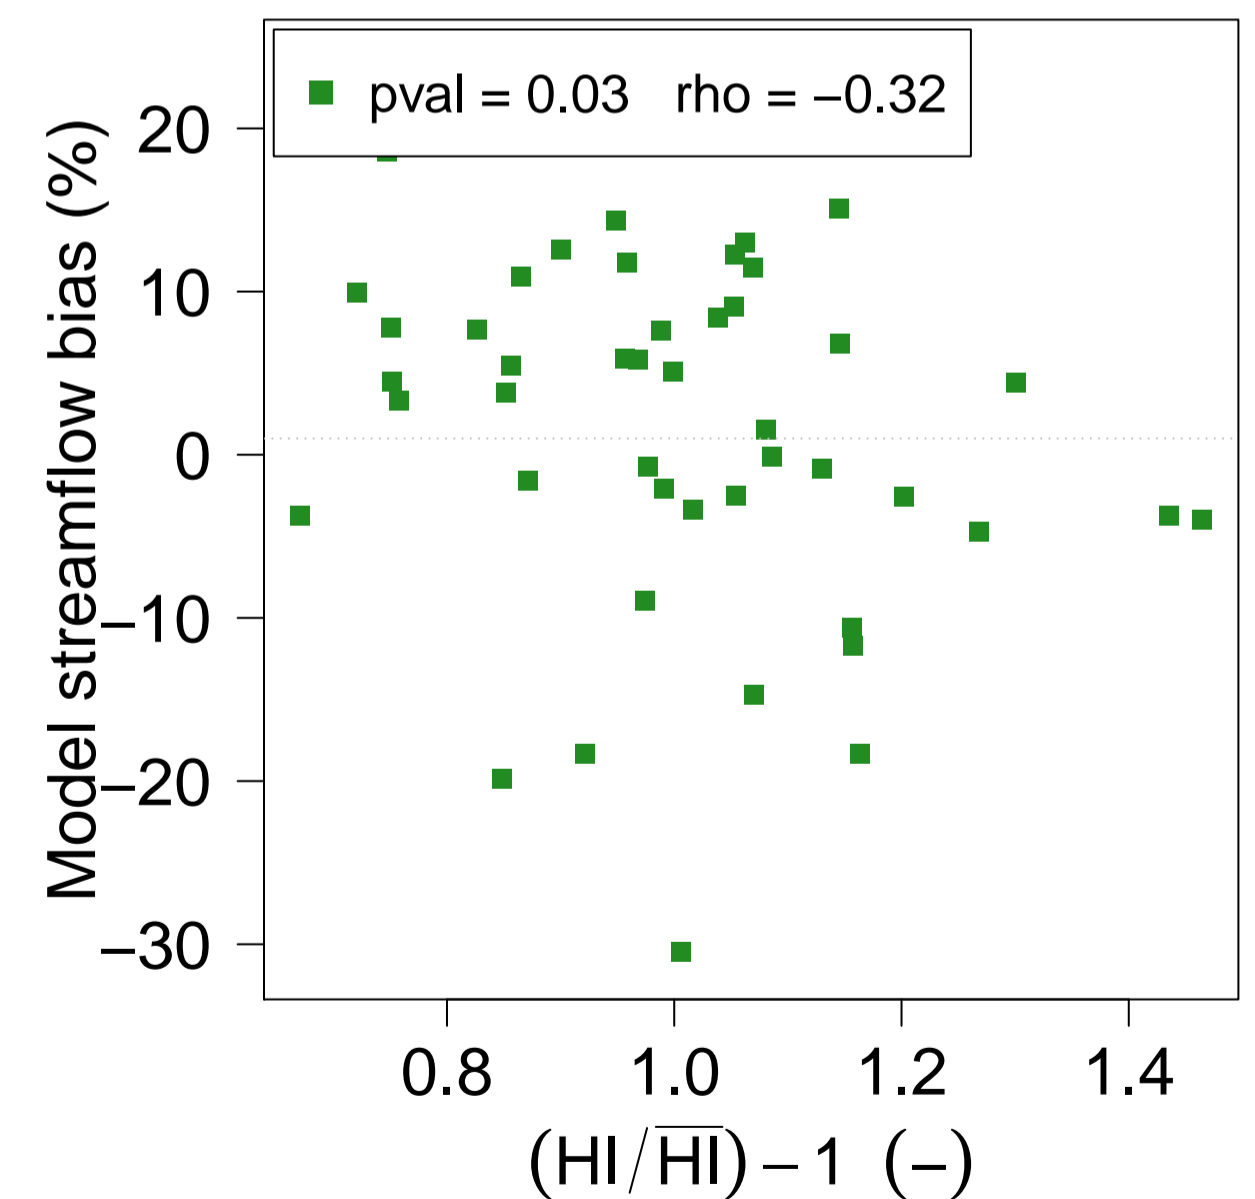

Figure 11. Streamflow annual bias obtained with the RAT function of time (top), temperature absolute anomalies (bottom left) and precipitation  $P$  (bottom centre) and humidity index  $P/E_0$  (bottom right) anomalies, for the catchment L0563010

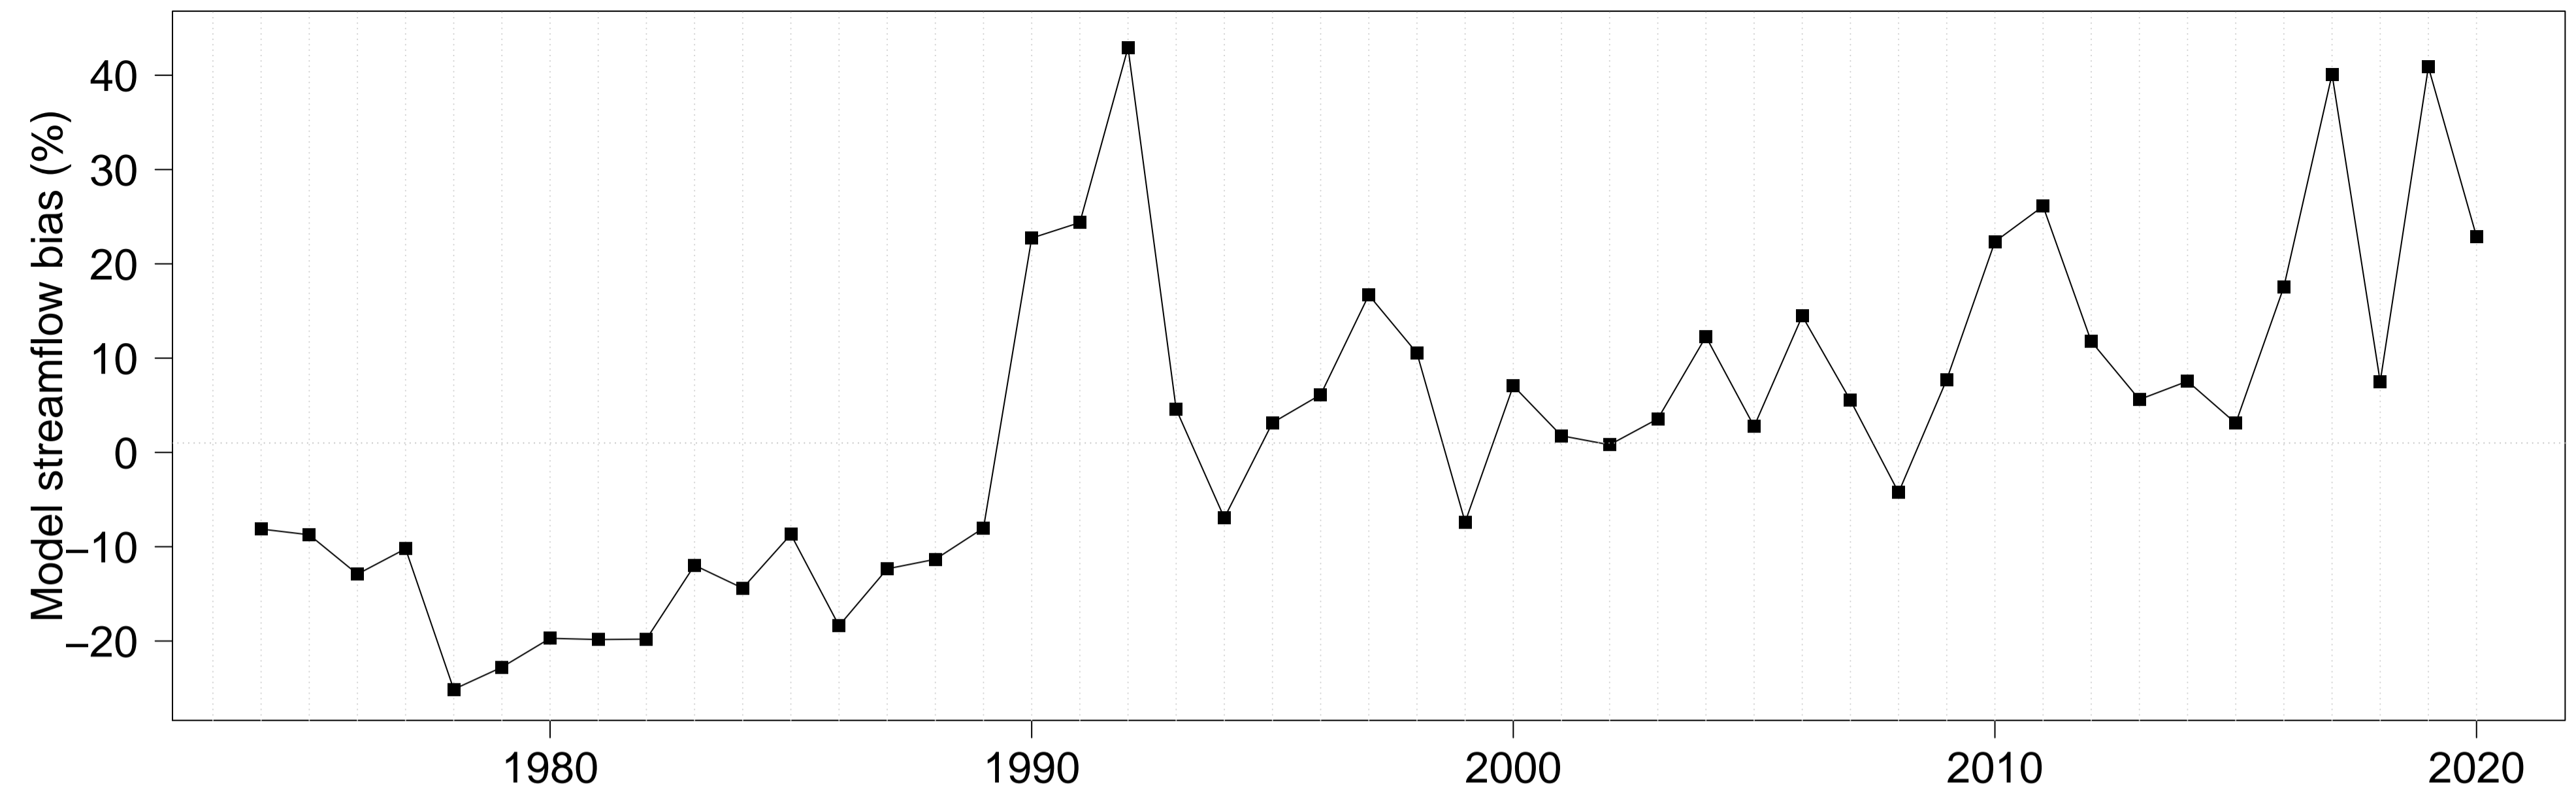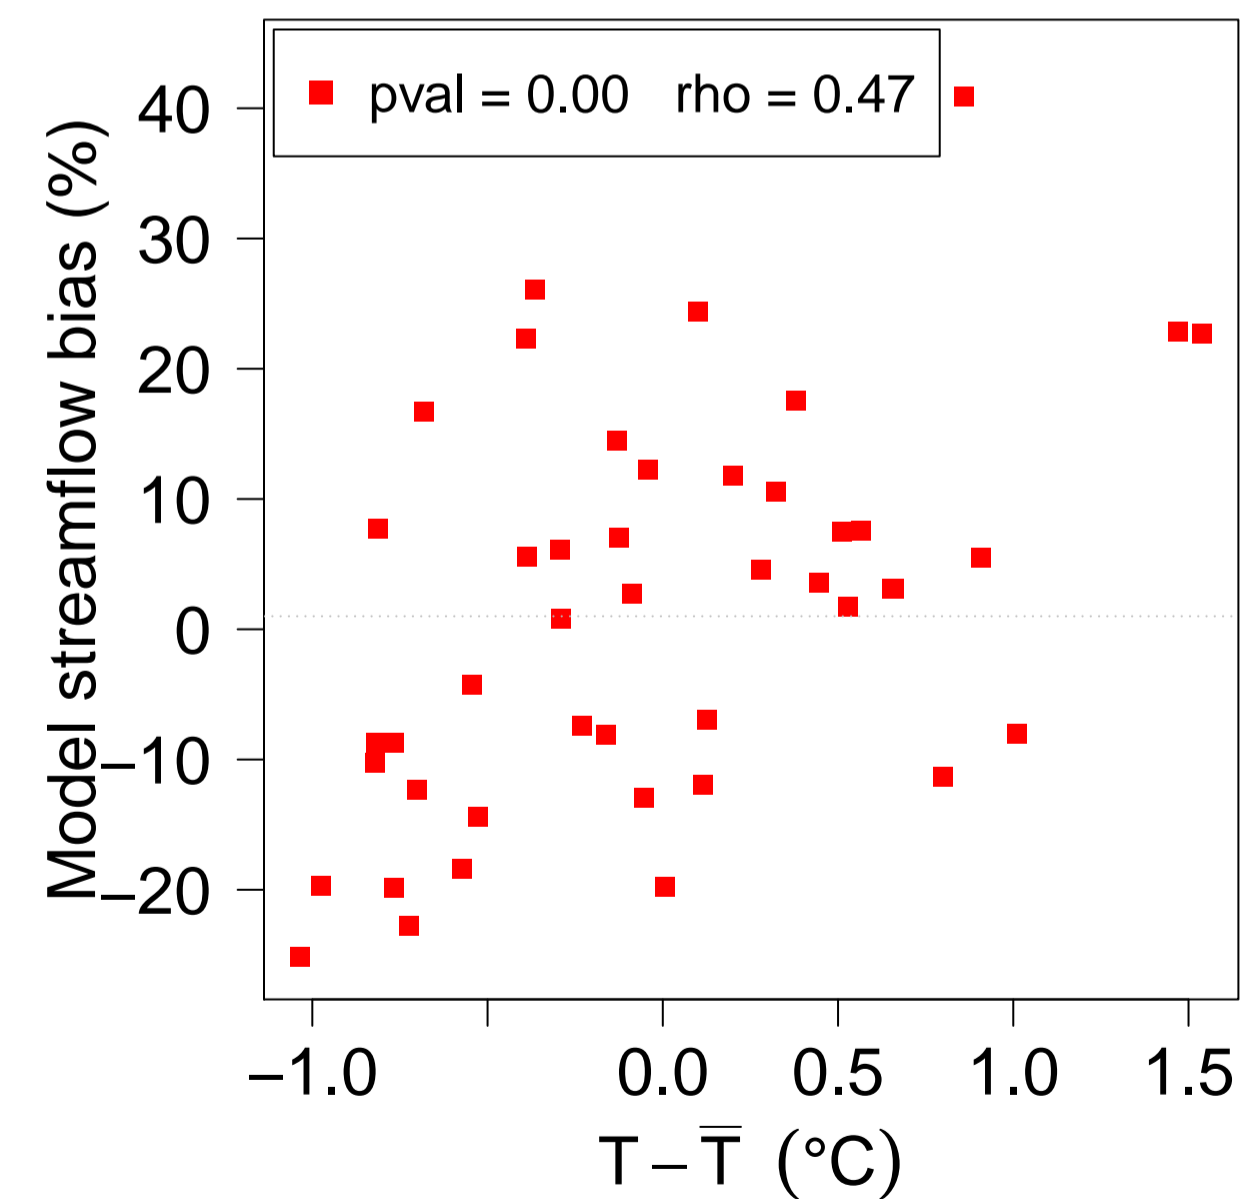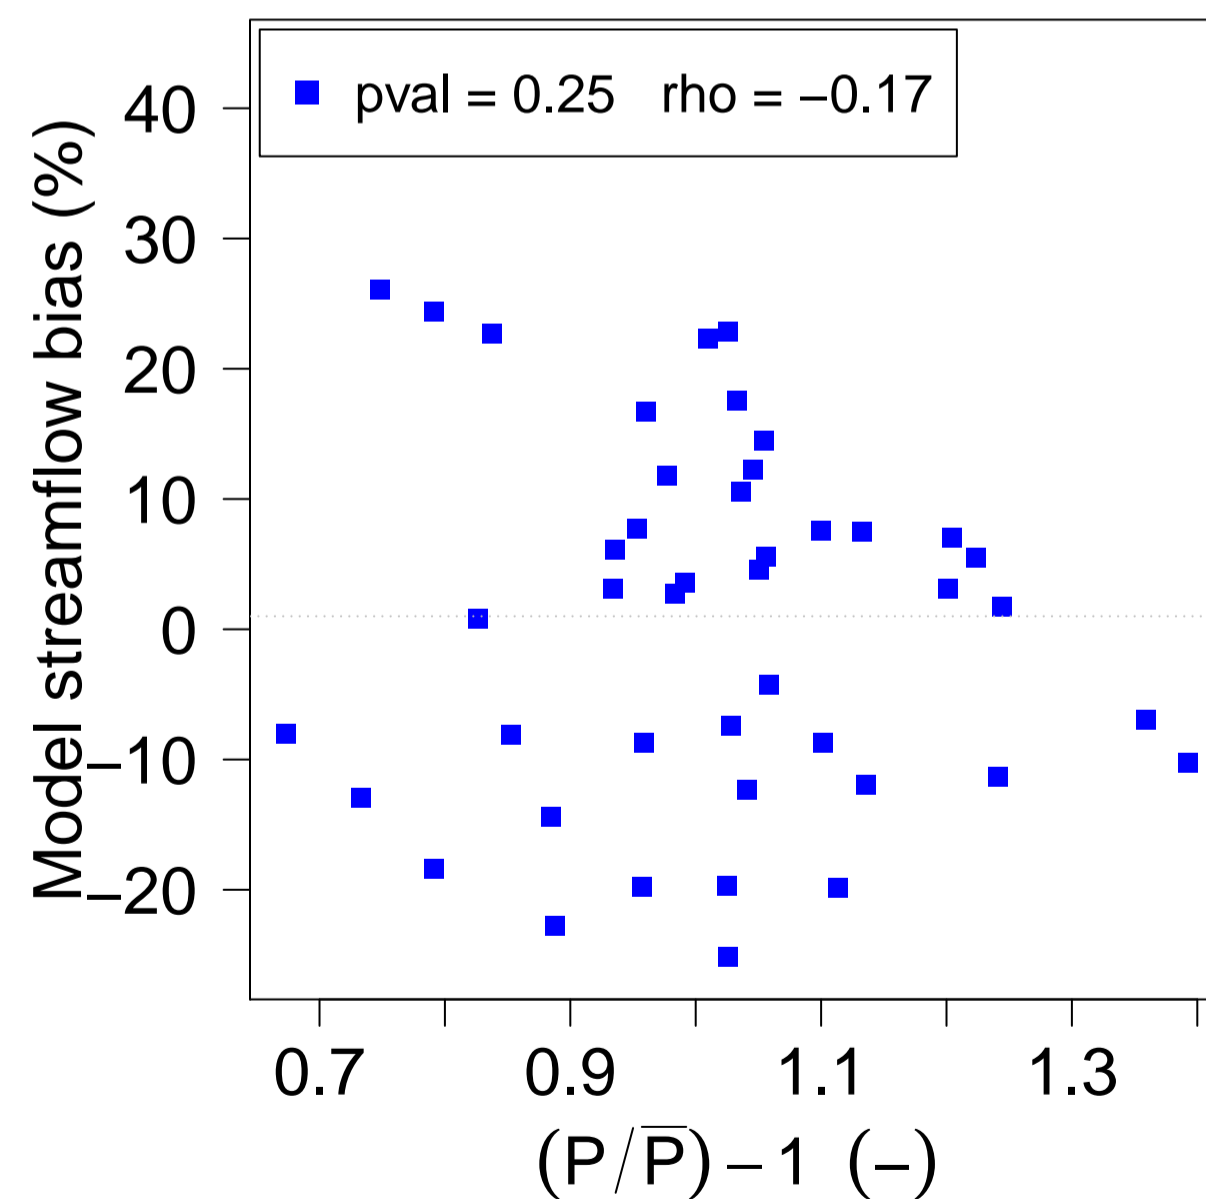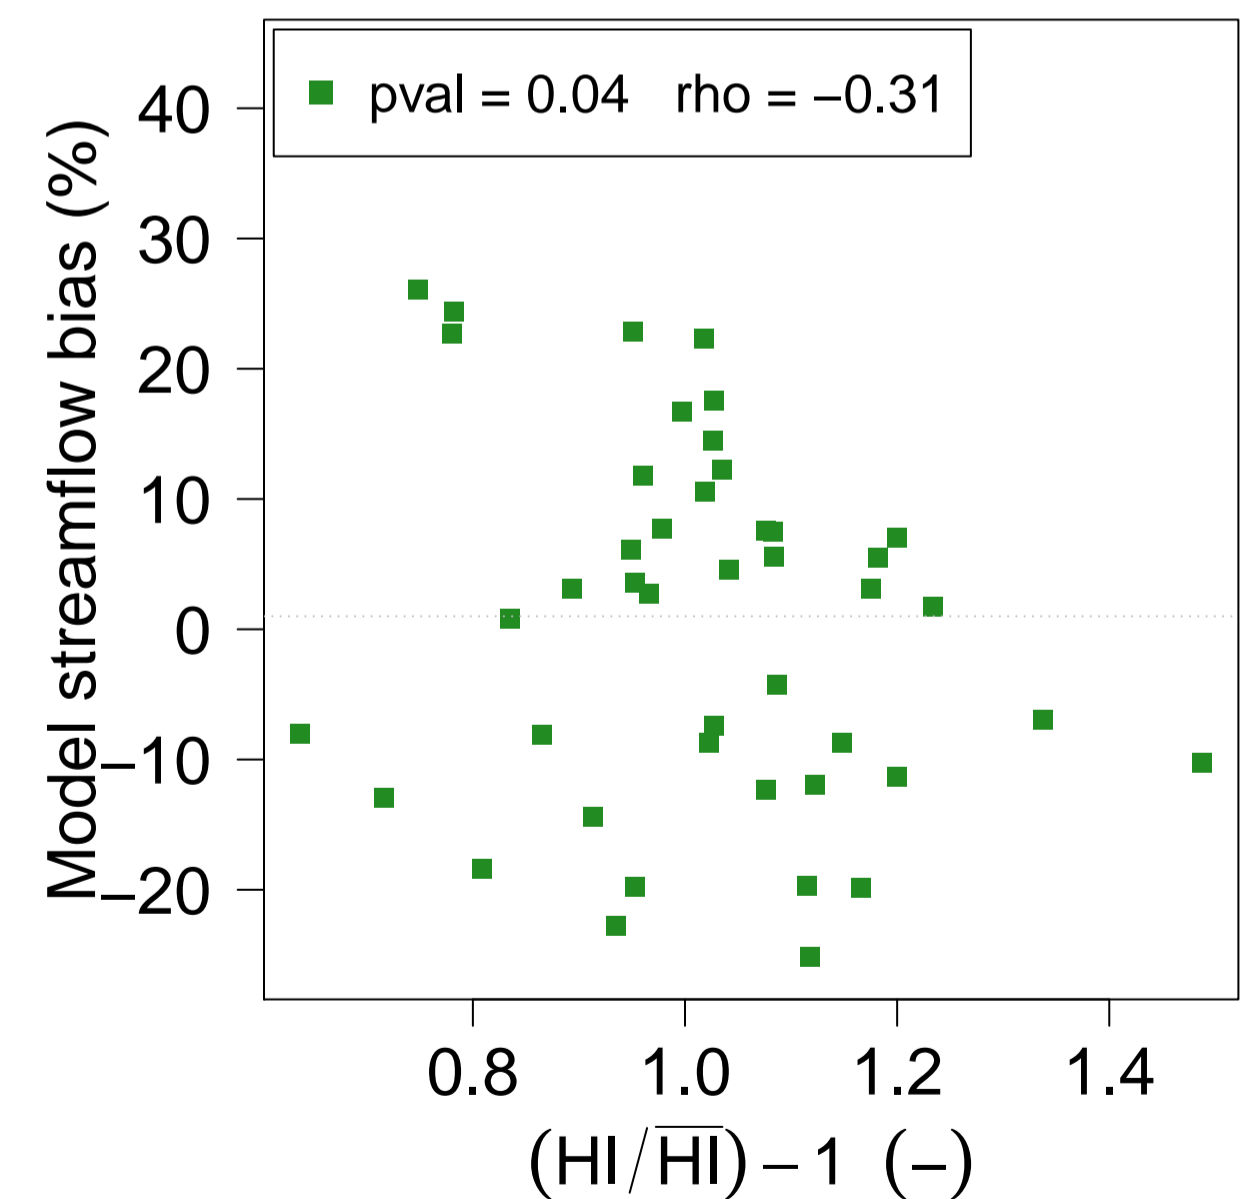

Figure 12. Streamflow annual bias obtained with the RAT function of time (top), temperature absolute anomalies (bottom left) and precipitation  $P$  (bottom centre) and humidity index  $P/E_0$  (bottom right) anomalies, for the catchment L4411710

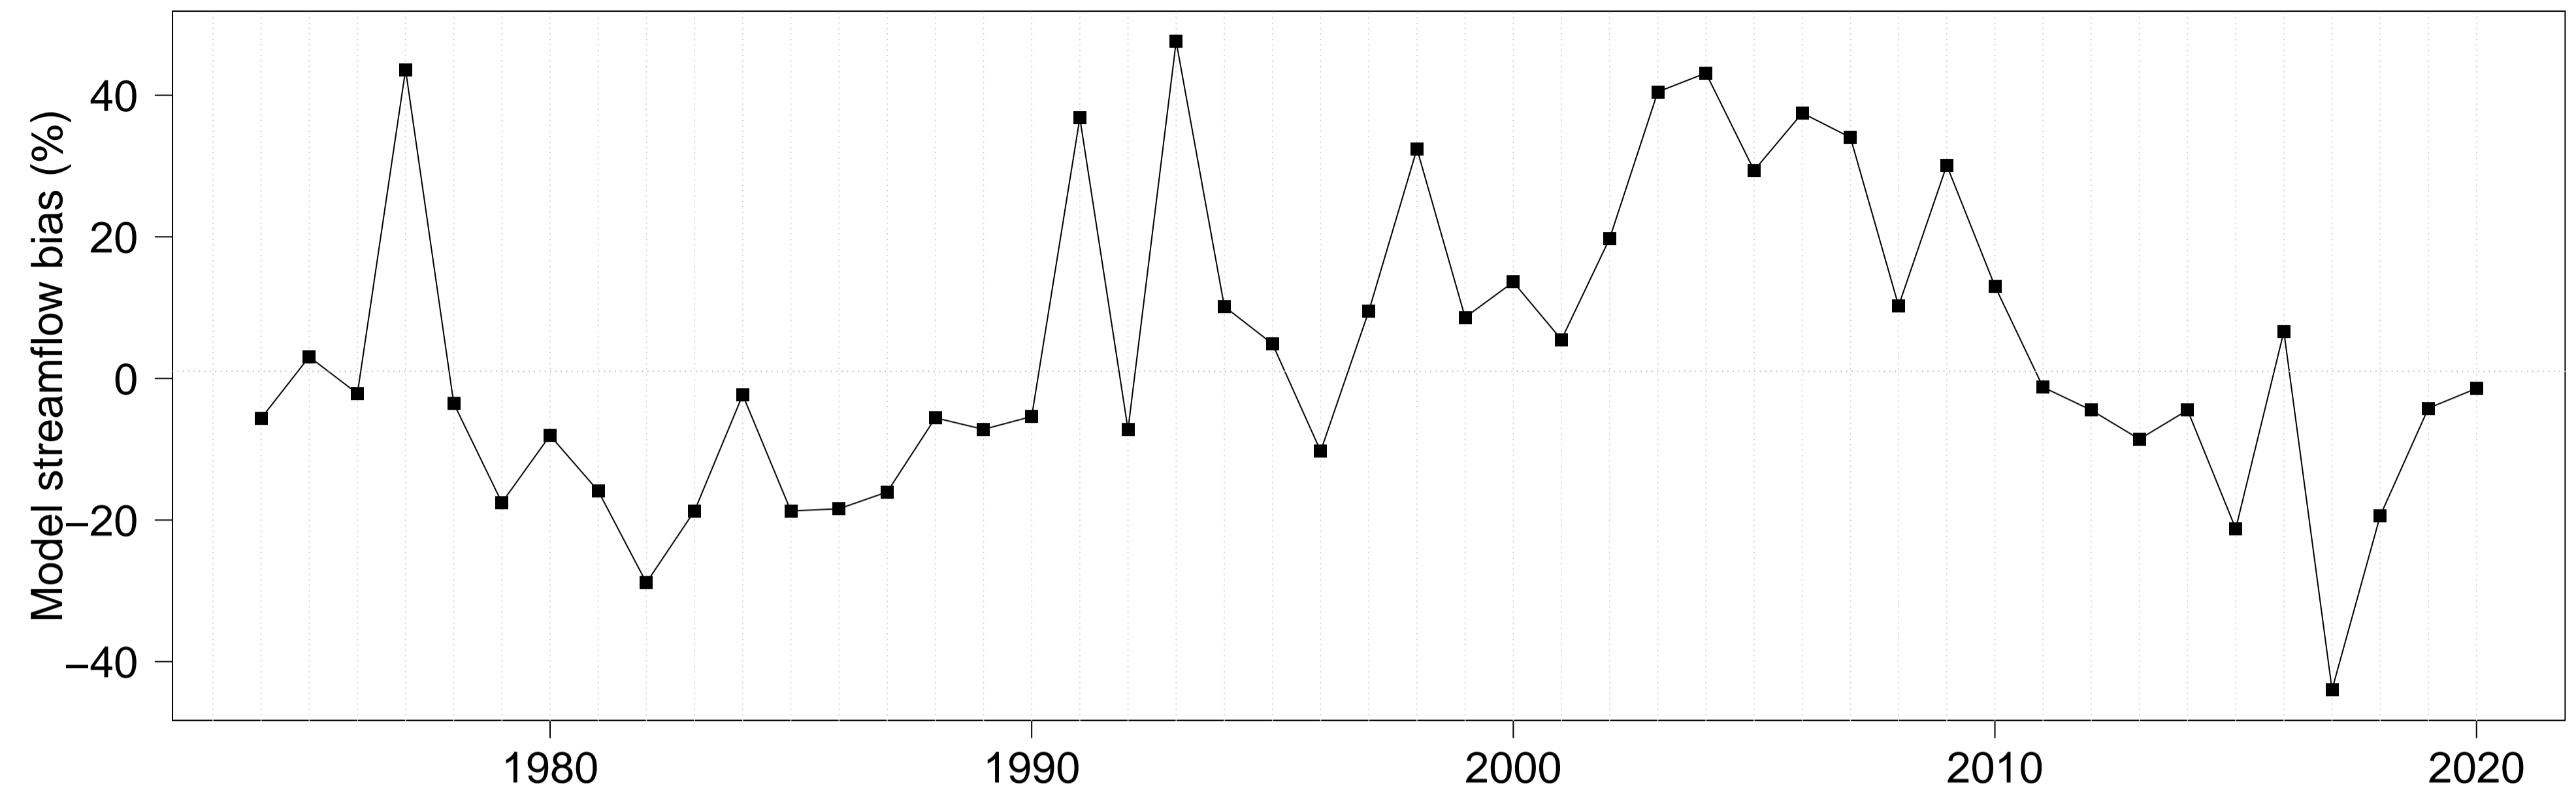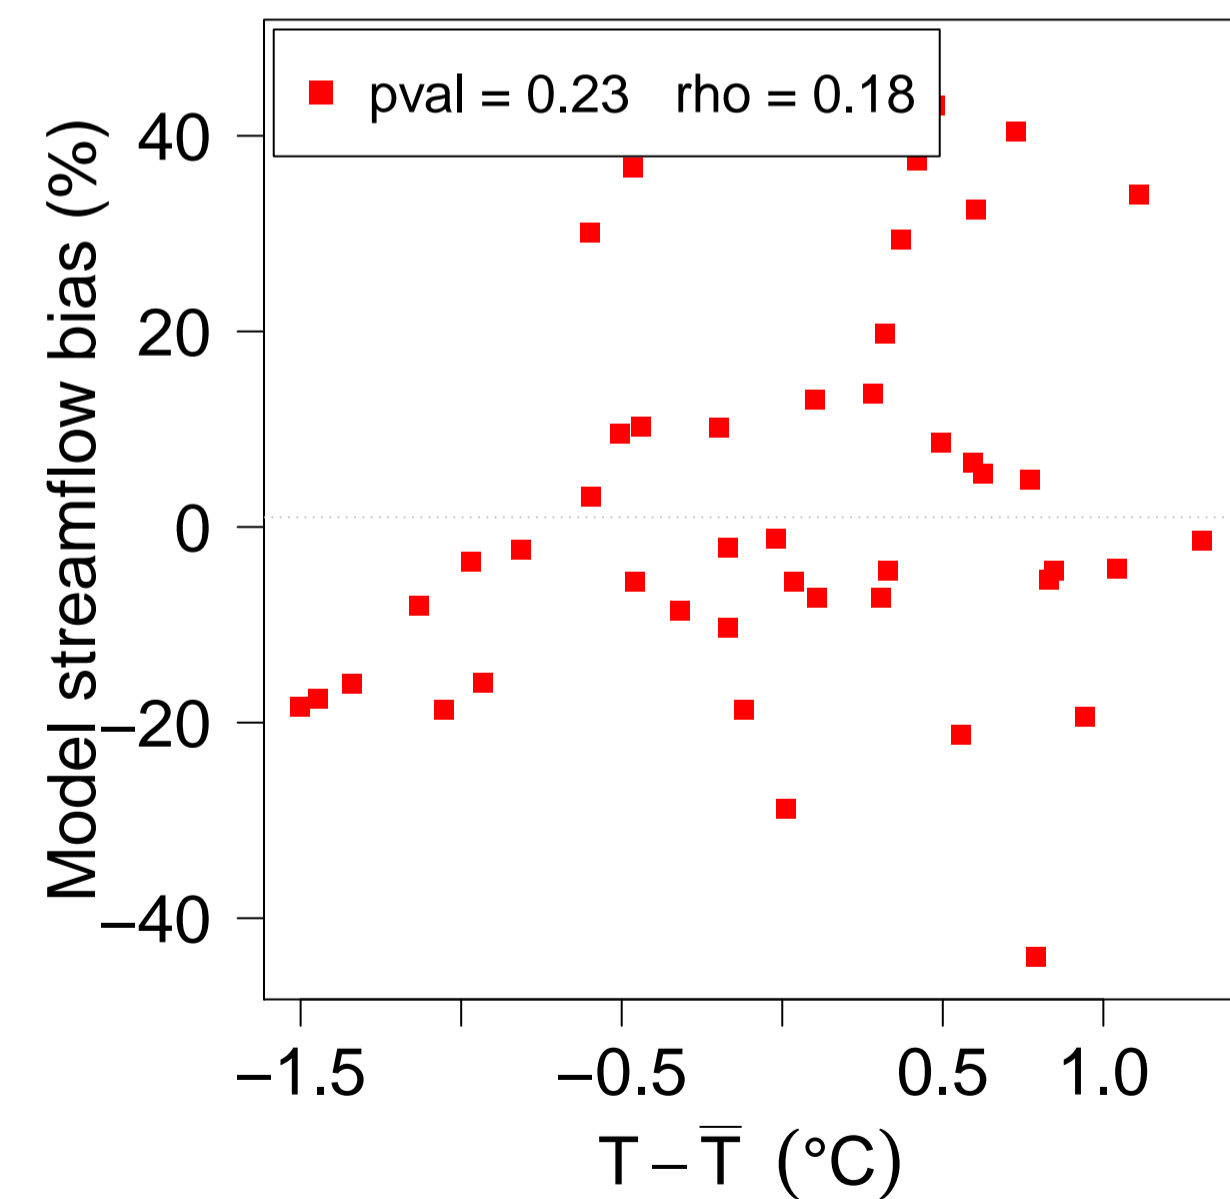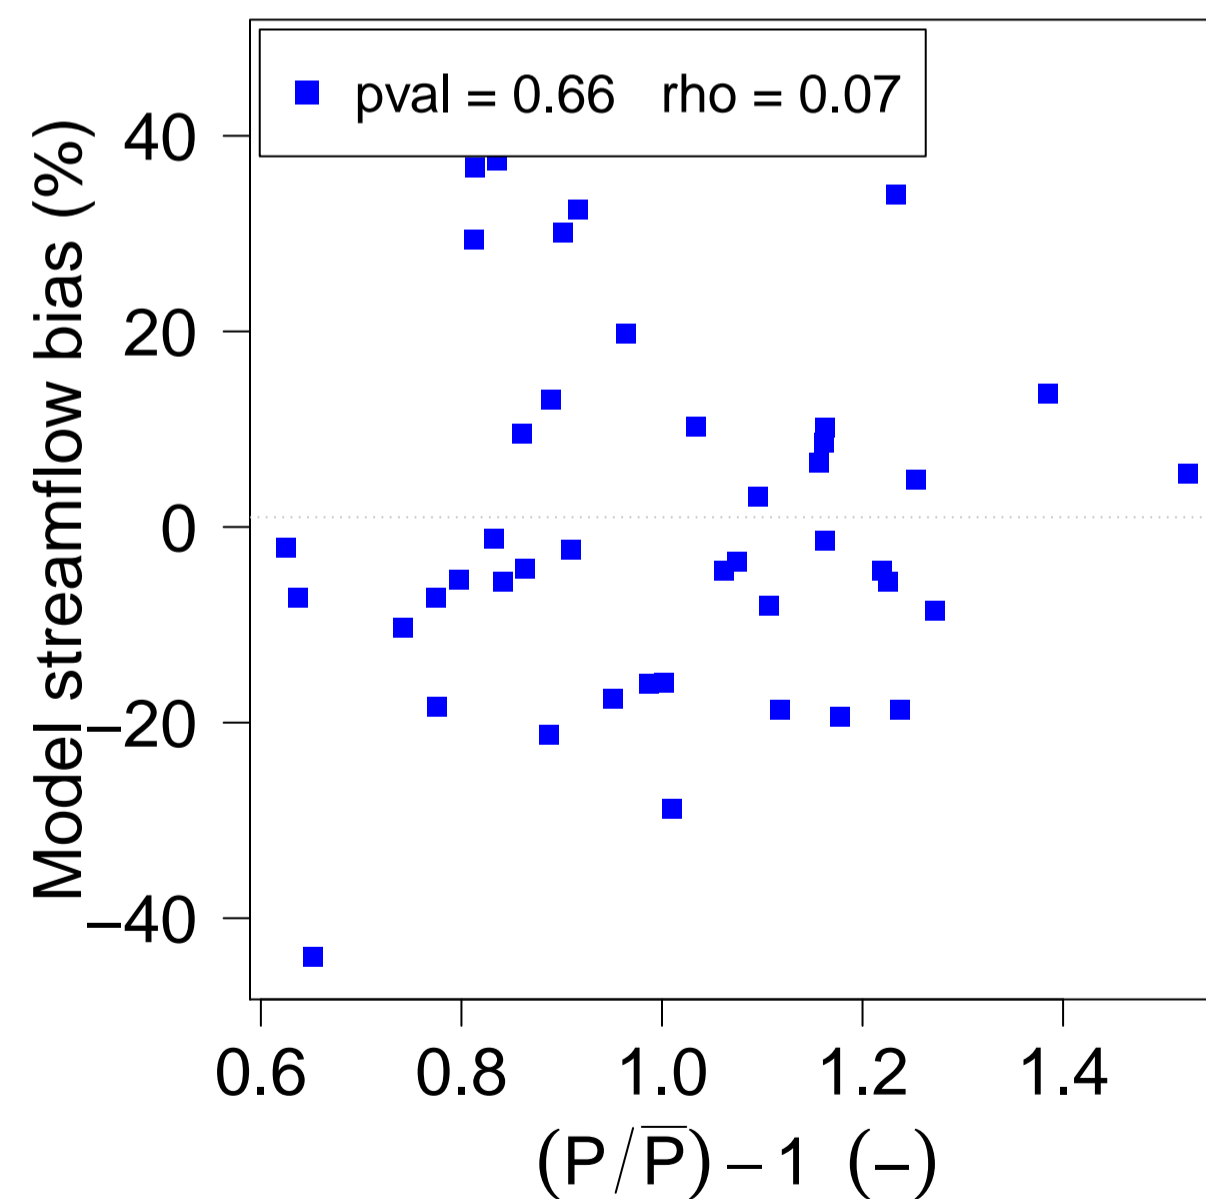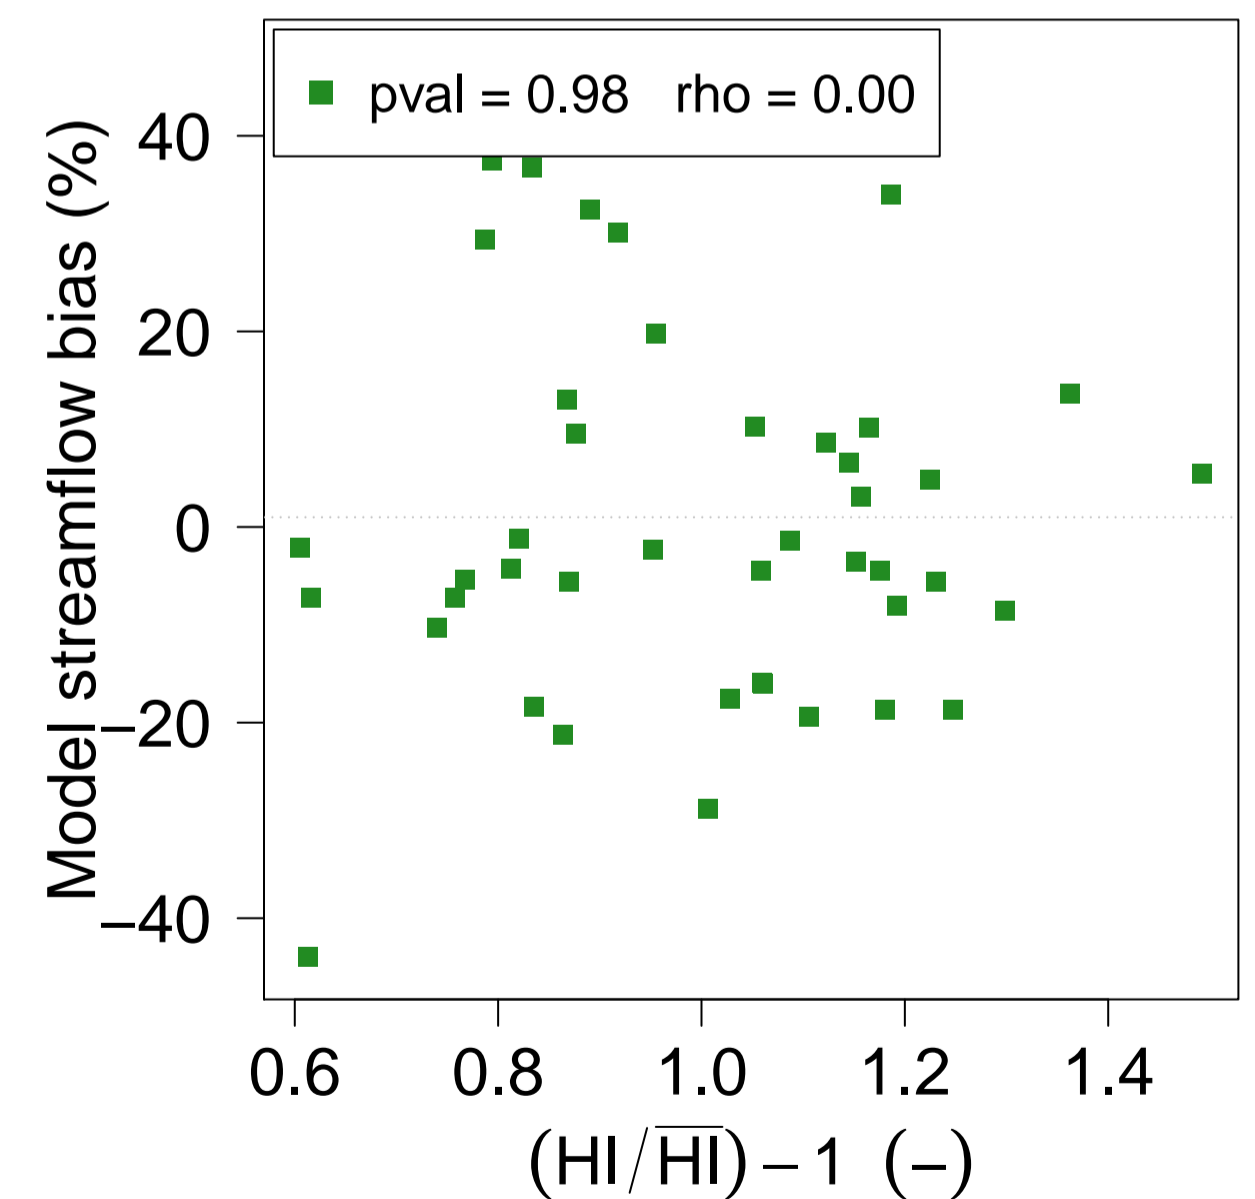

Figure 13. Streamflow annual bias obtained with the RAT function of time (top), temperature absolute anomalies (bottom left) and precipitation  $P$  (bottom centre) and humidity index  $P/E0$  (bottom right) anomalies, for the catchment M0243010

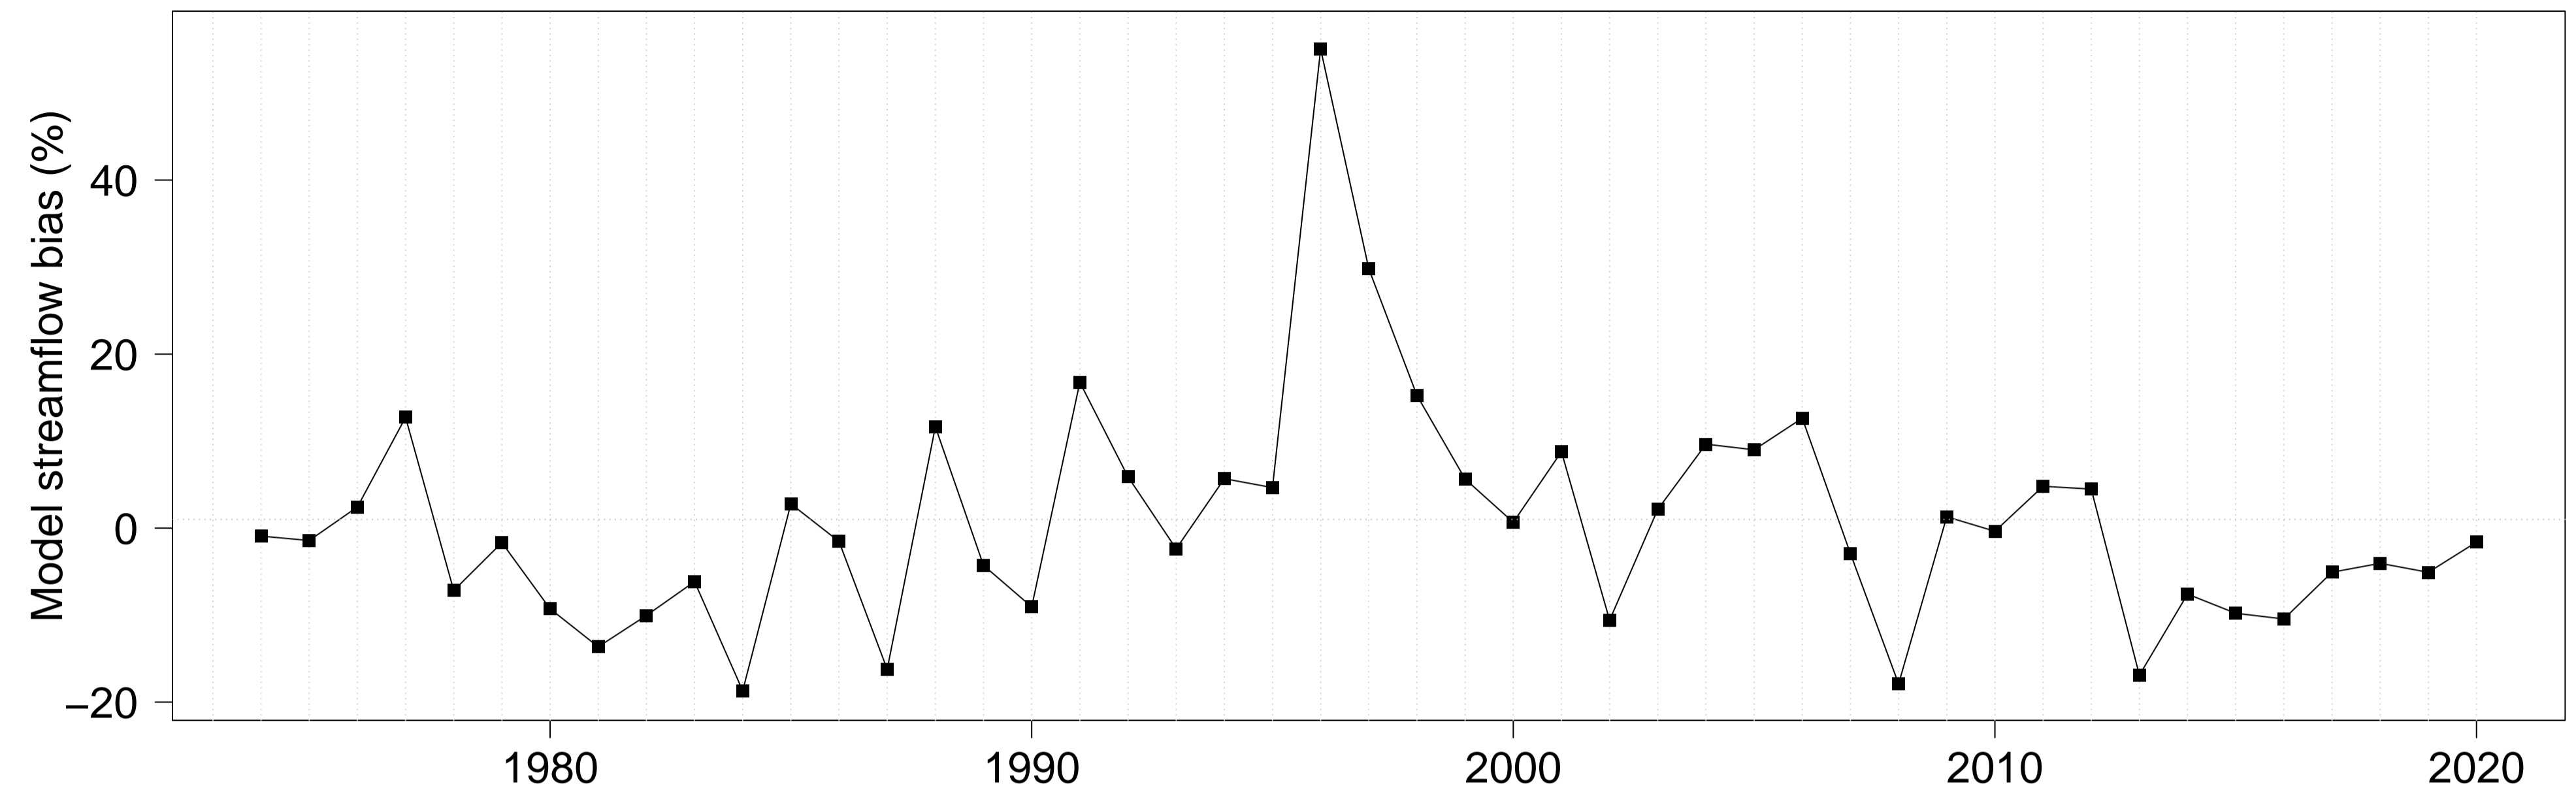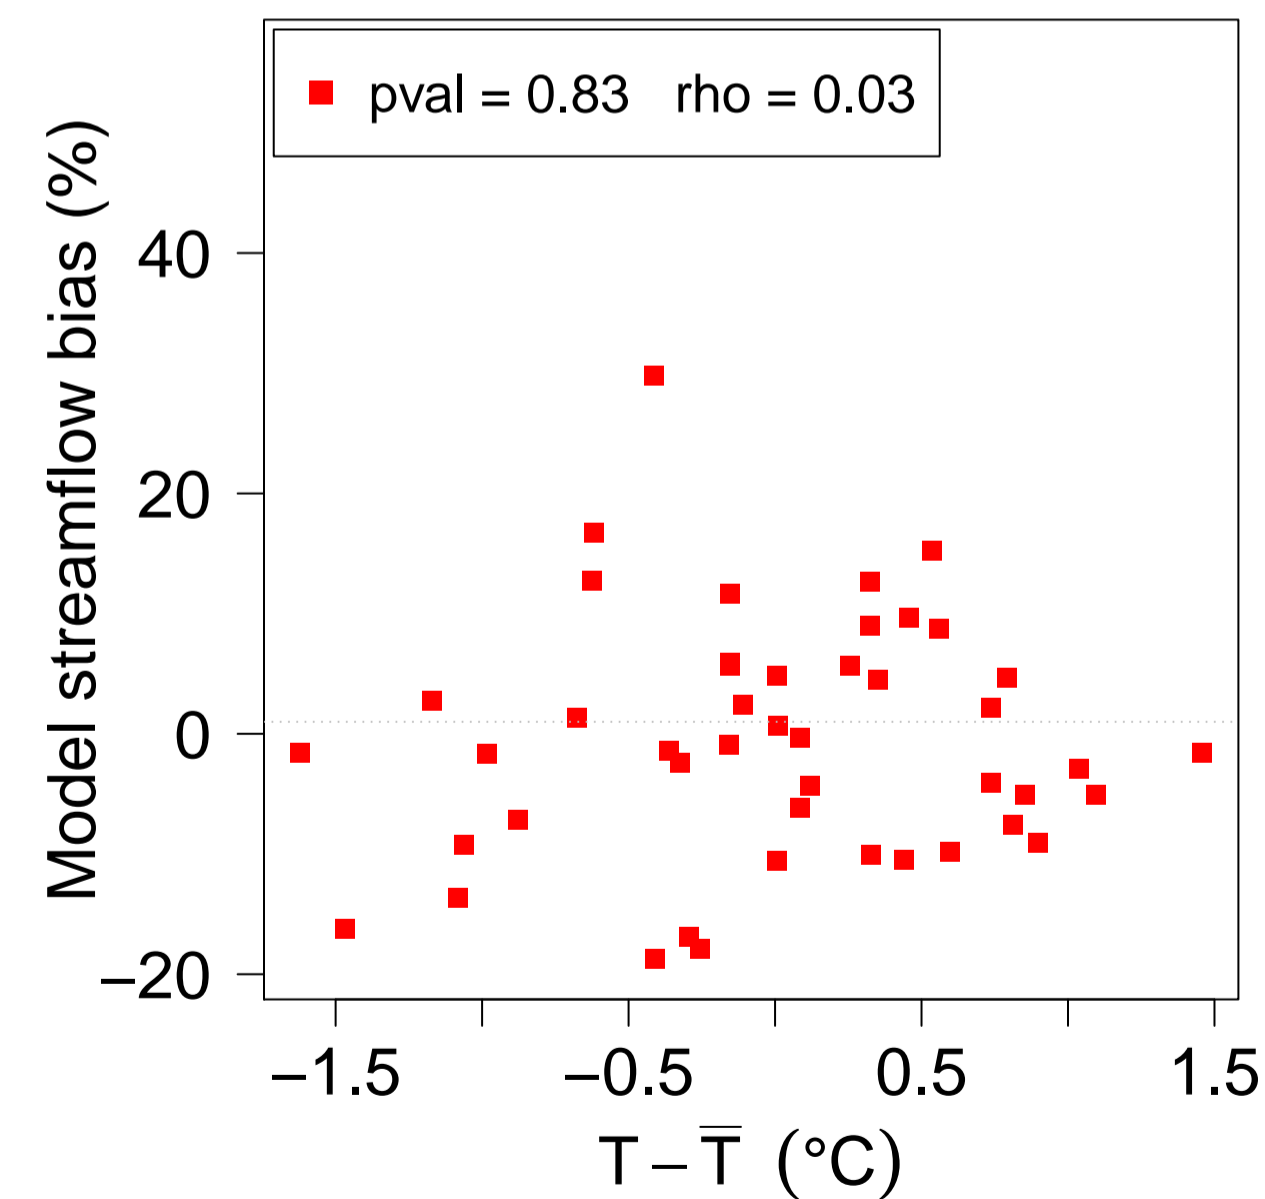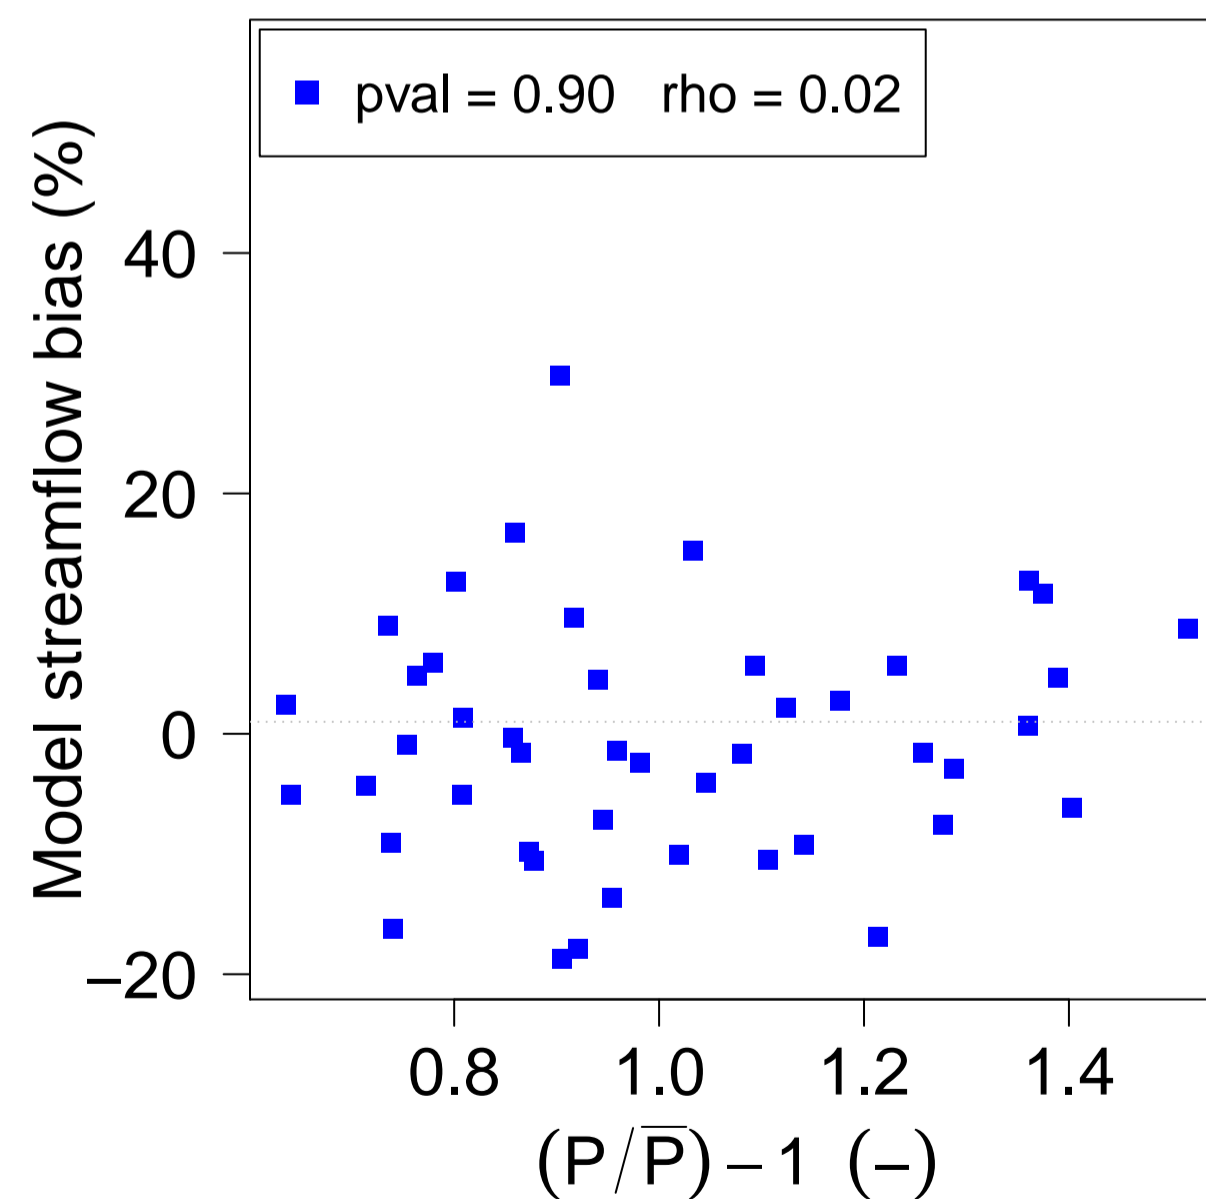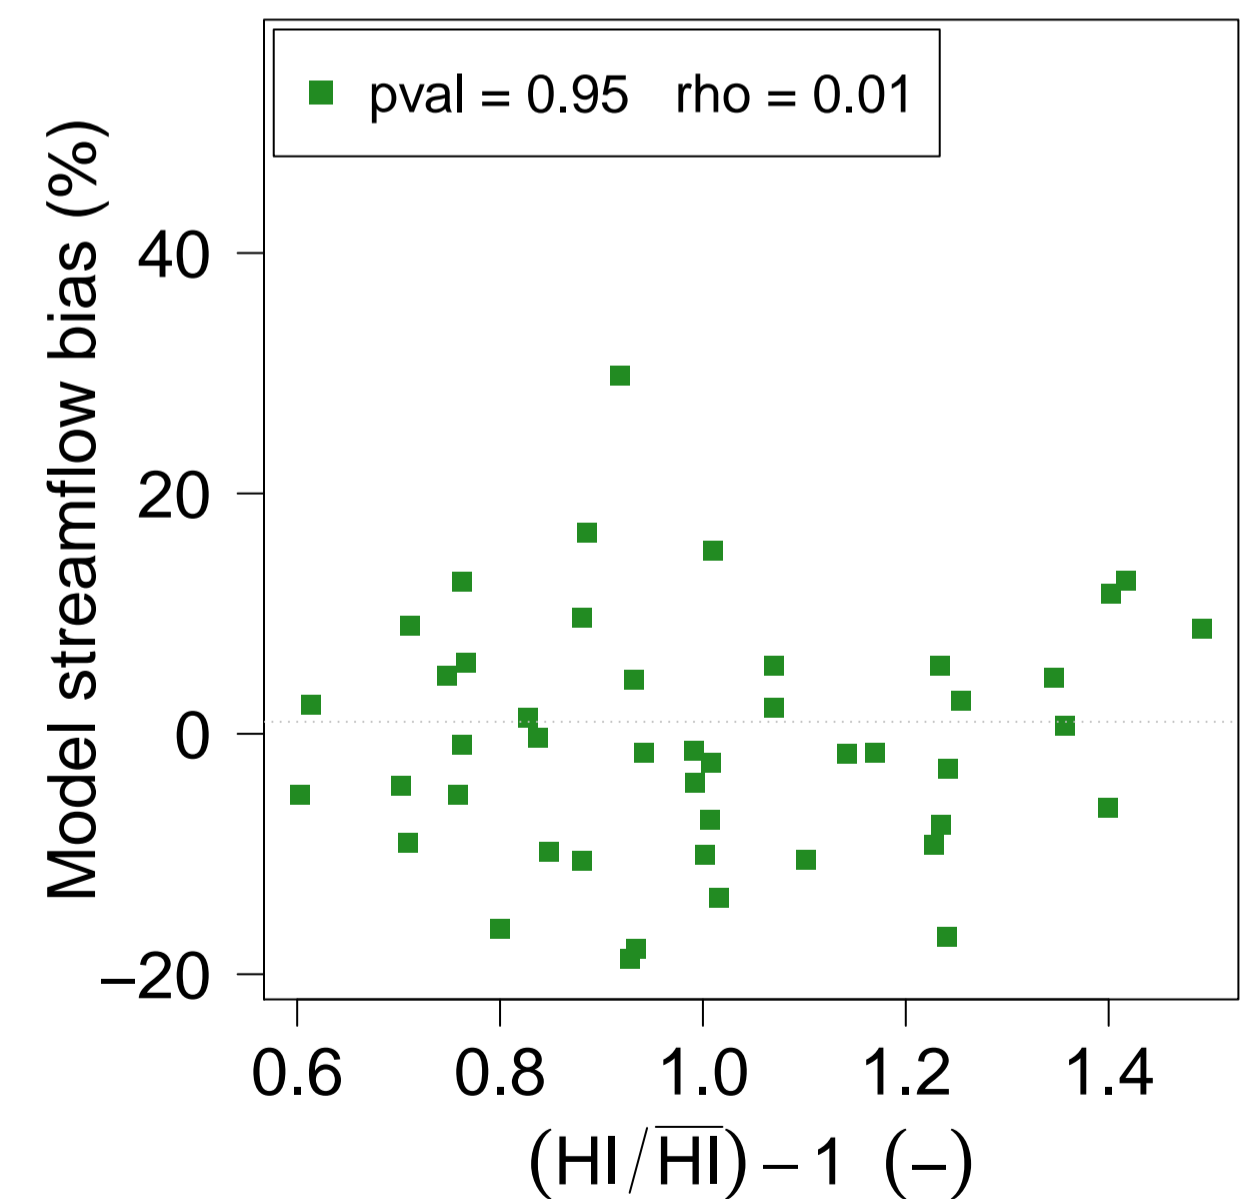

Figure 14. Streamflow annual bias obtained with the RAT function of time (top), temperature absolute anomalies (bottom left) and precipitation  $P$  (bottom centre) and humidity index  $P/E0$  (bottom right) anomalies, for the catchment M7112410

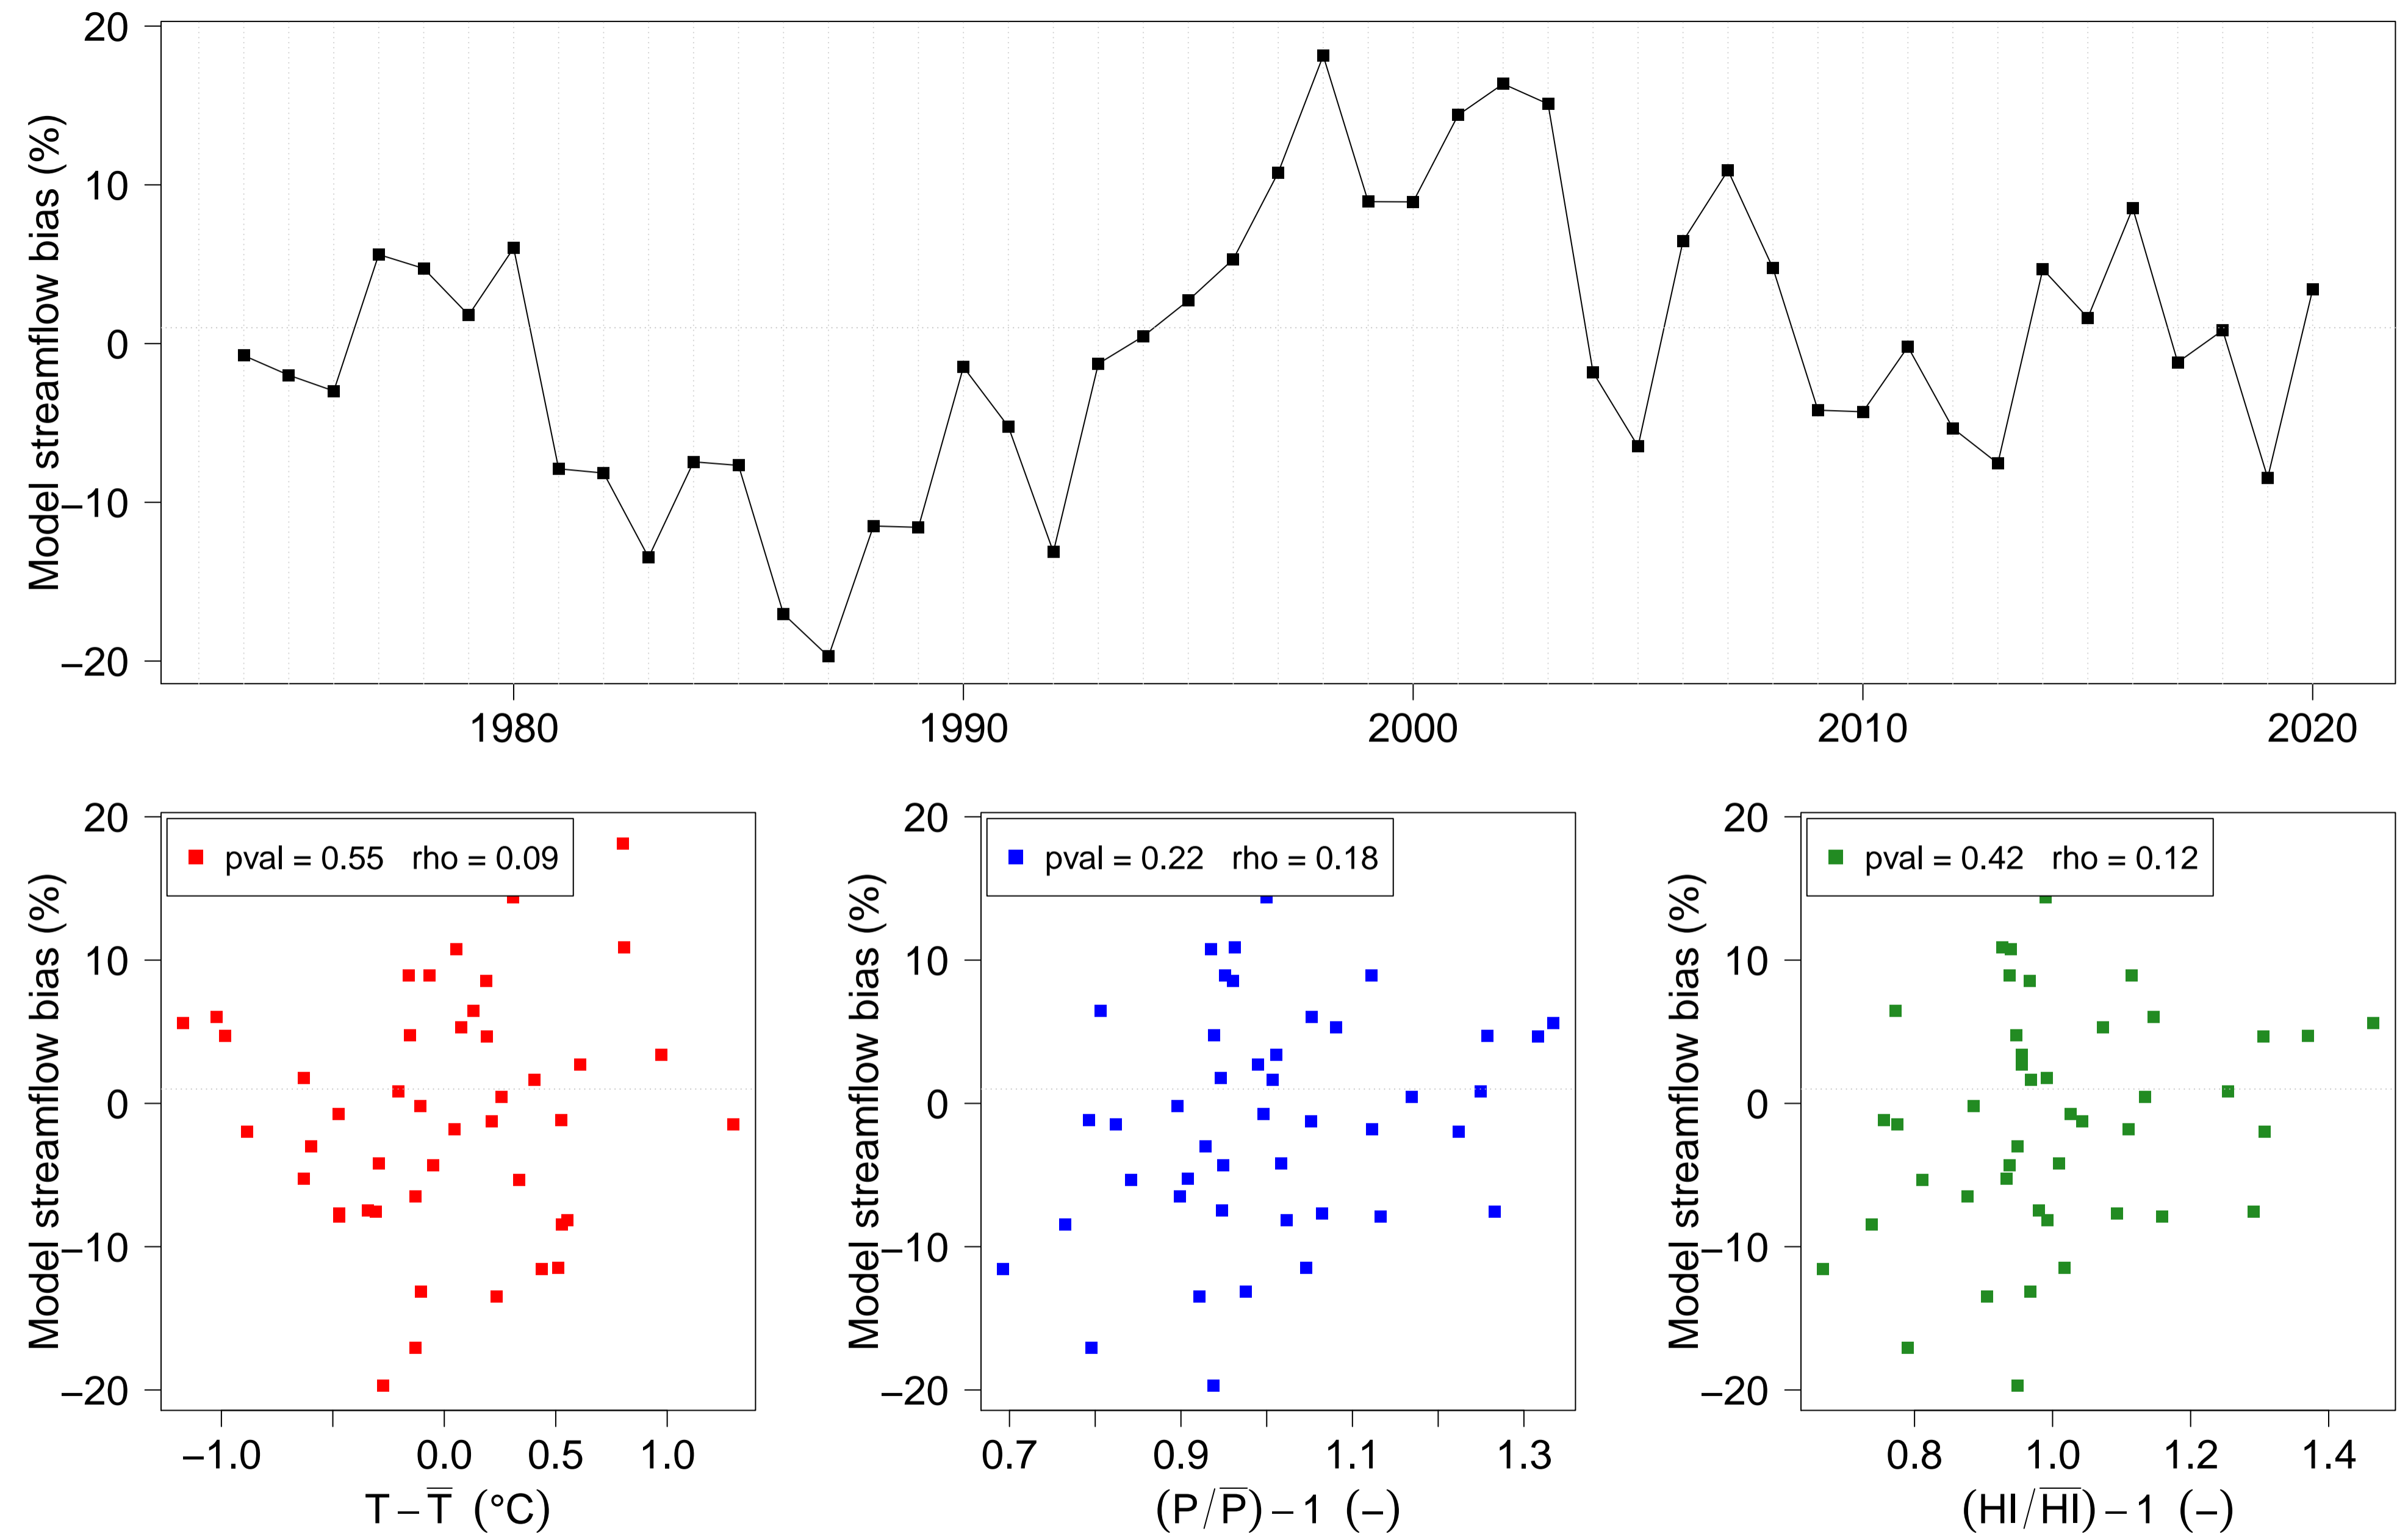

Figure 15. Streamflow annual bias obtained with the RAT function of time (top), temperature absolute anomalies (bottom left) and precipitation  $P$  (bottom centre) and humidity index  $P/E_0$  (bottom right) anomalies, for the catchment O0592510

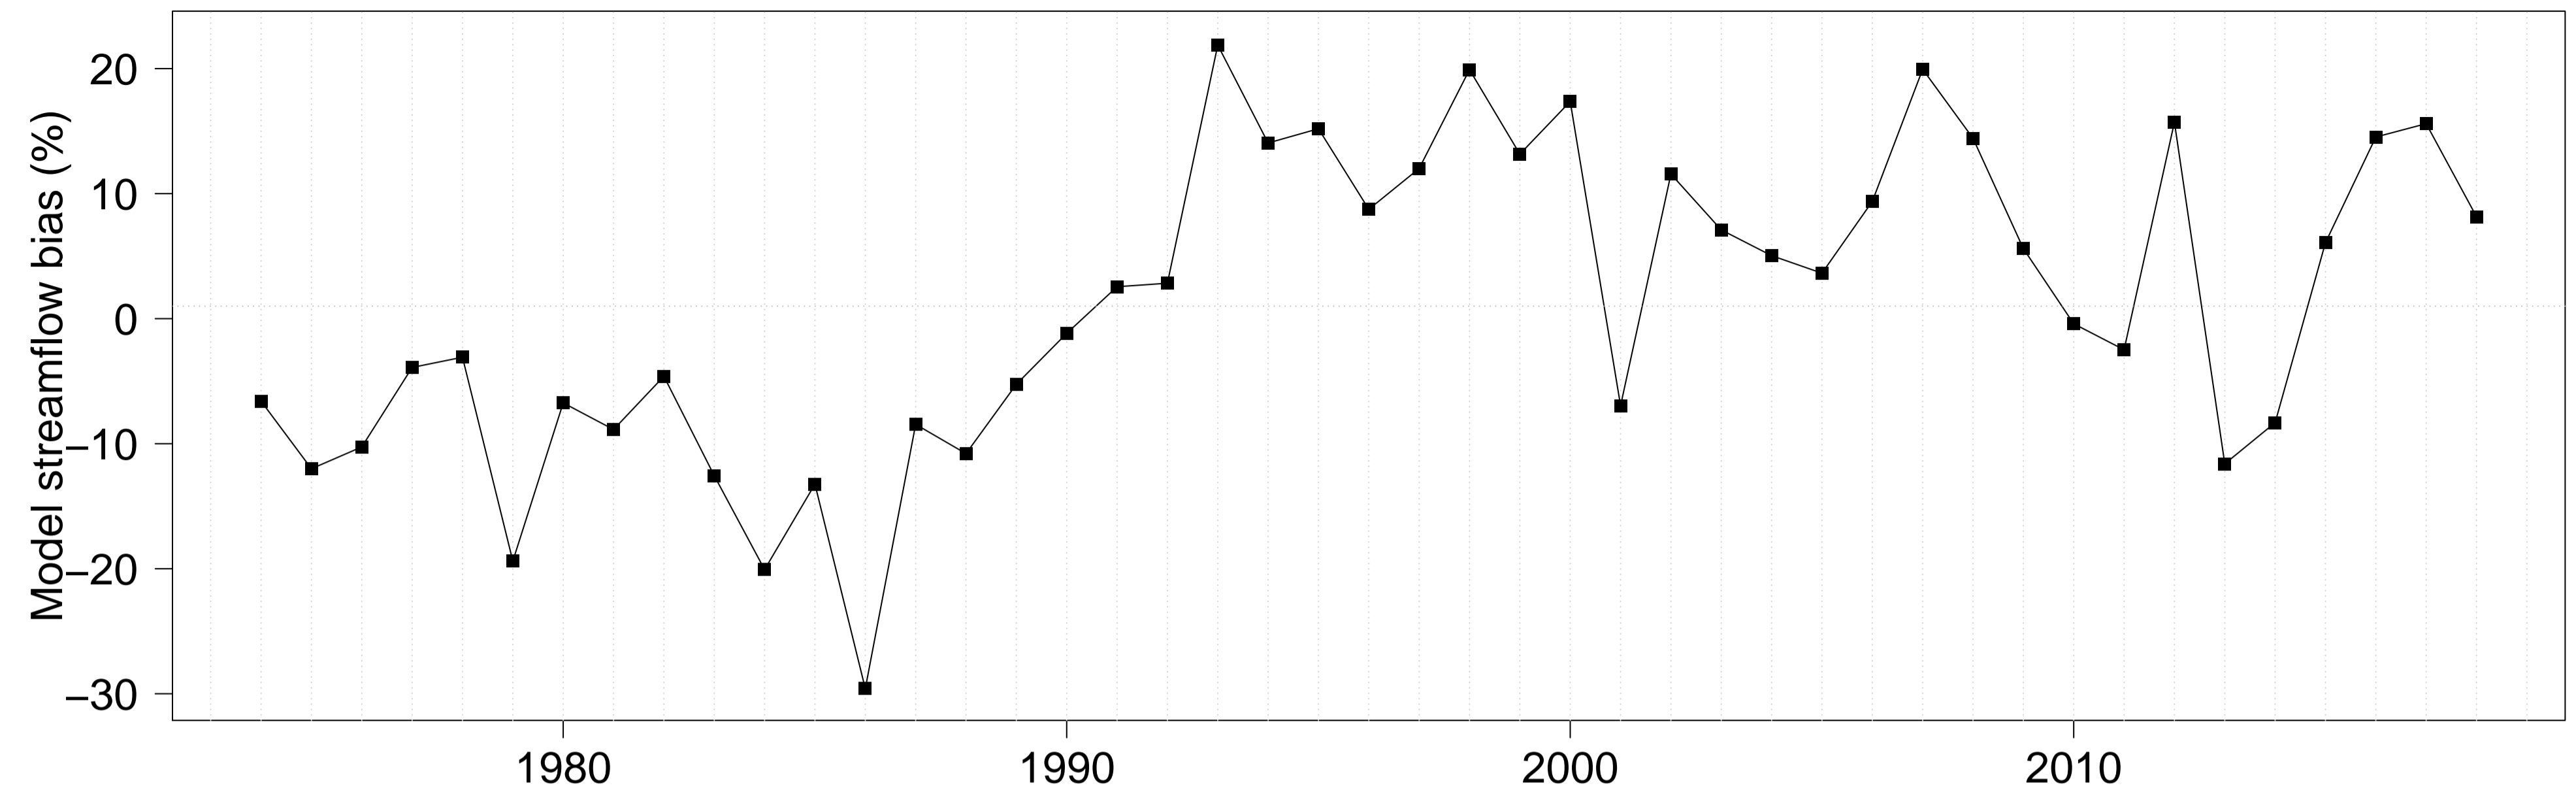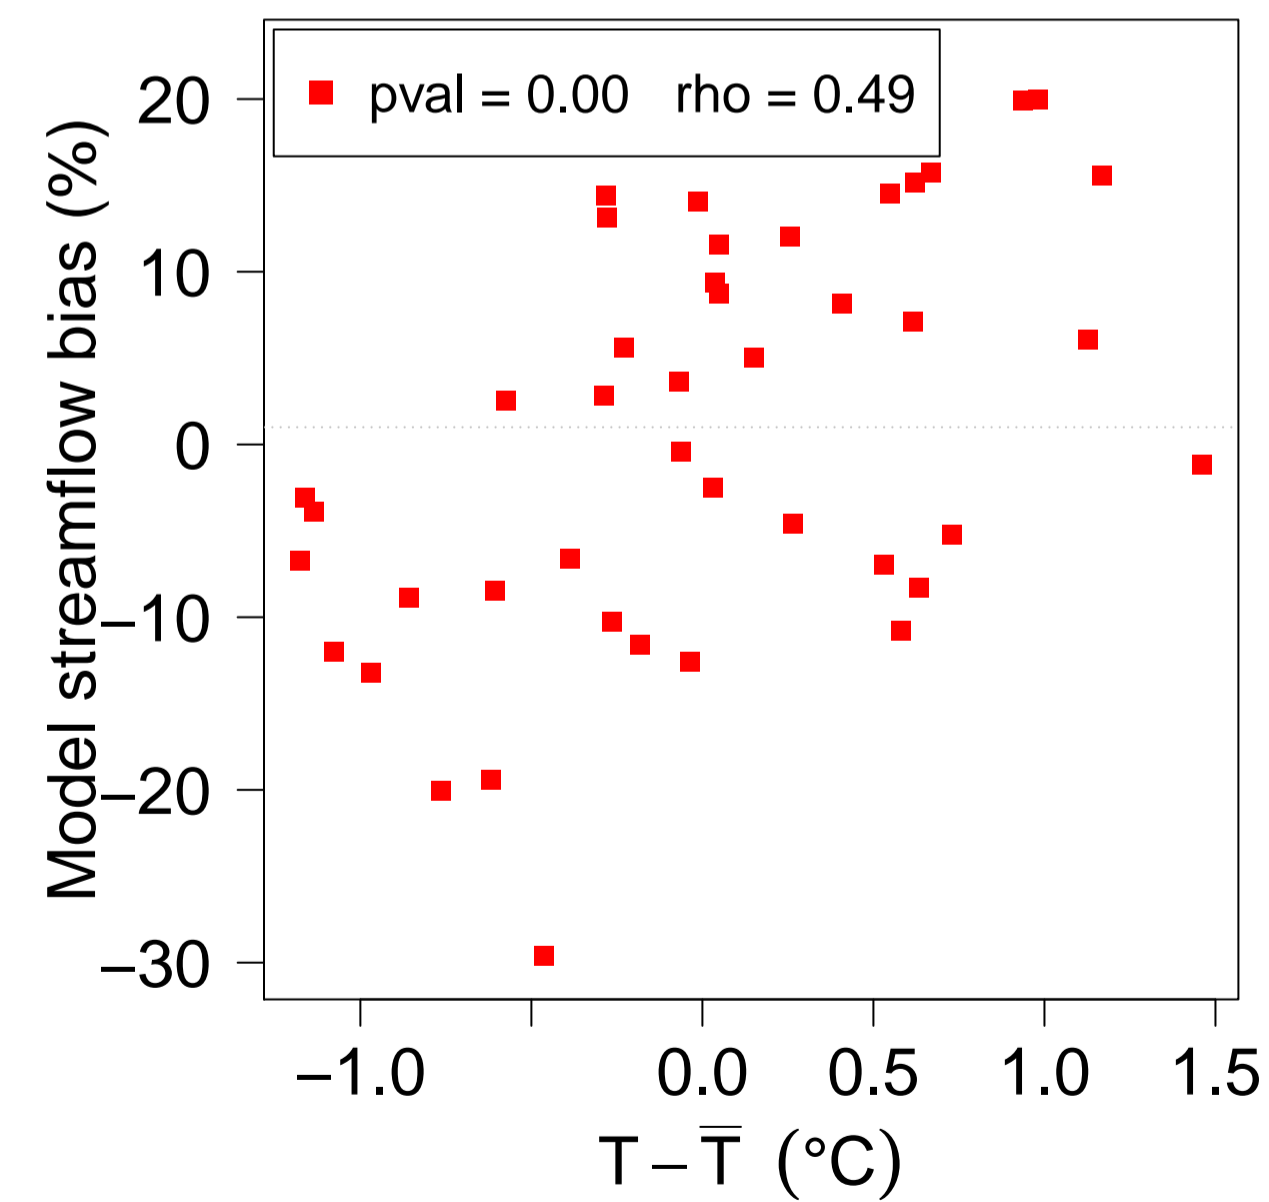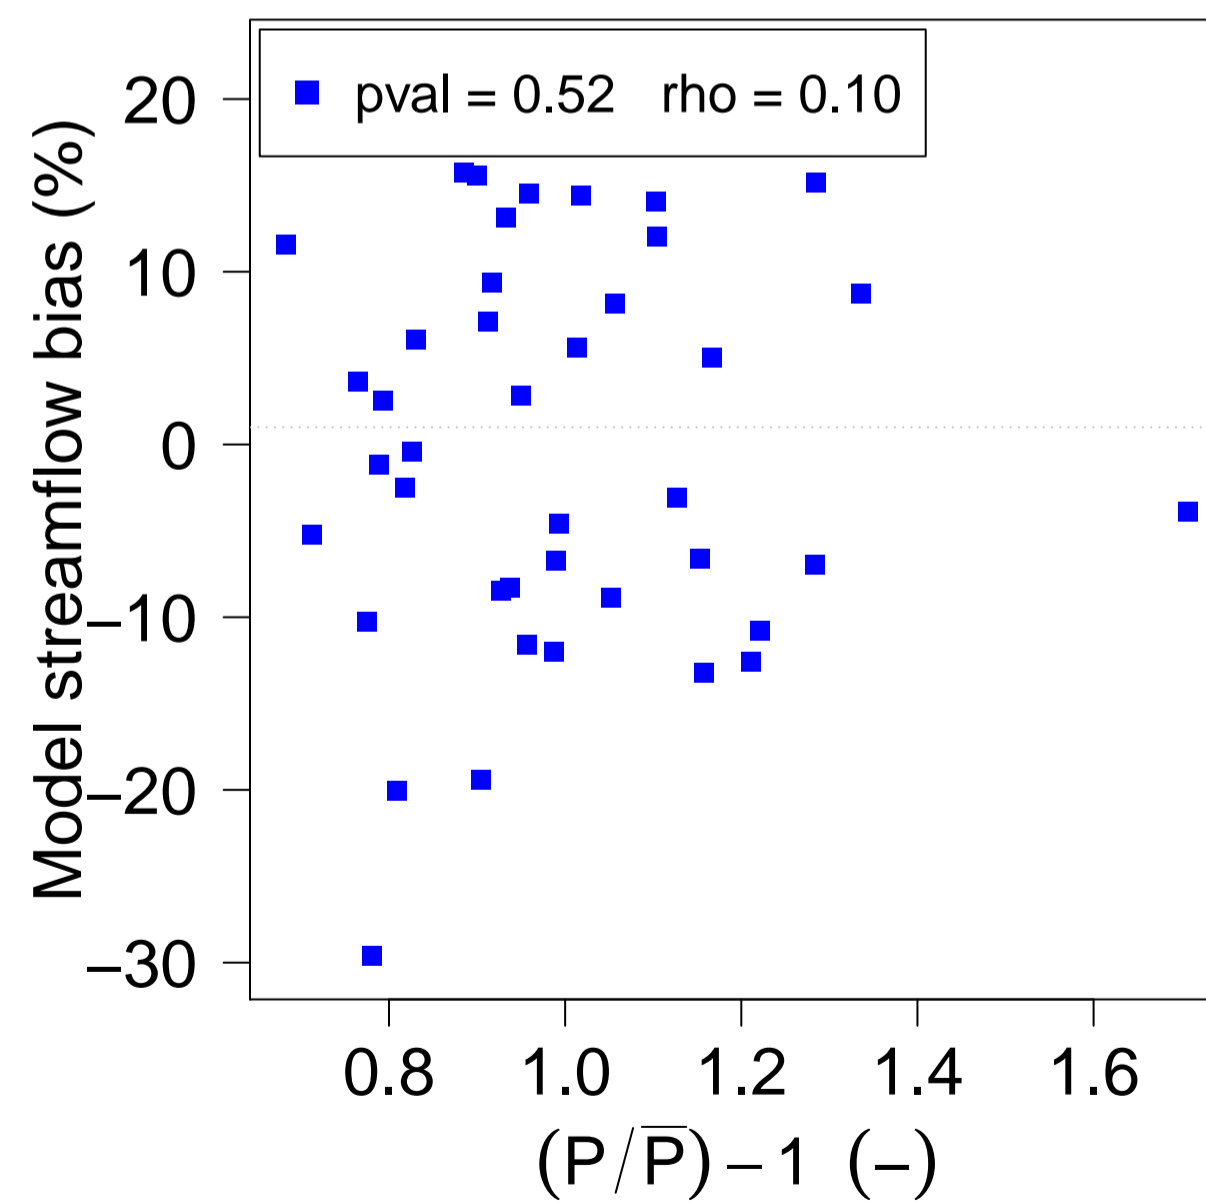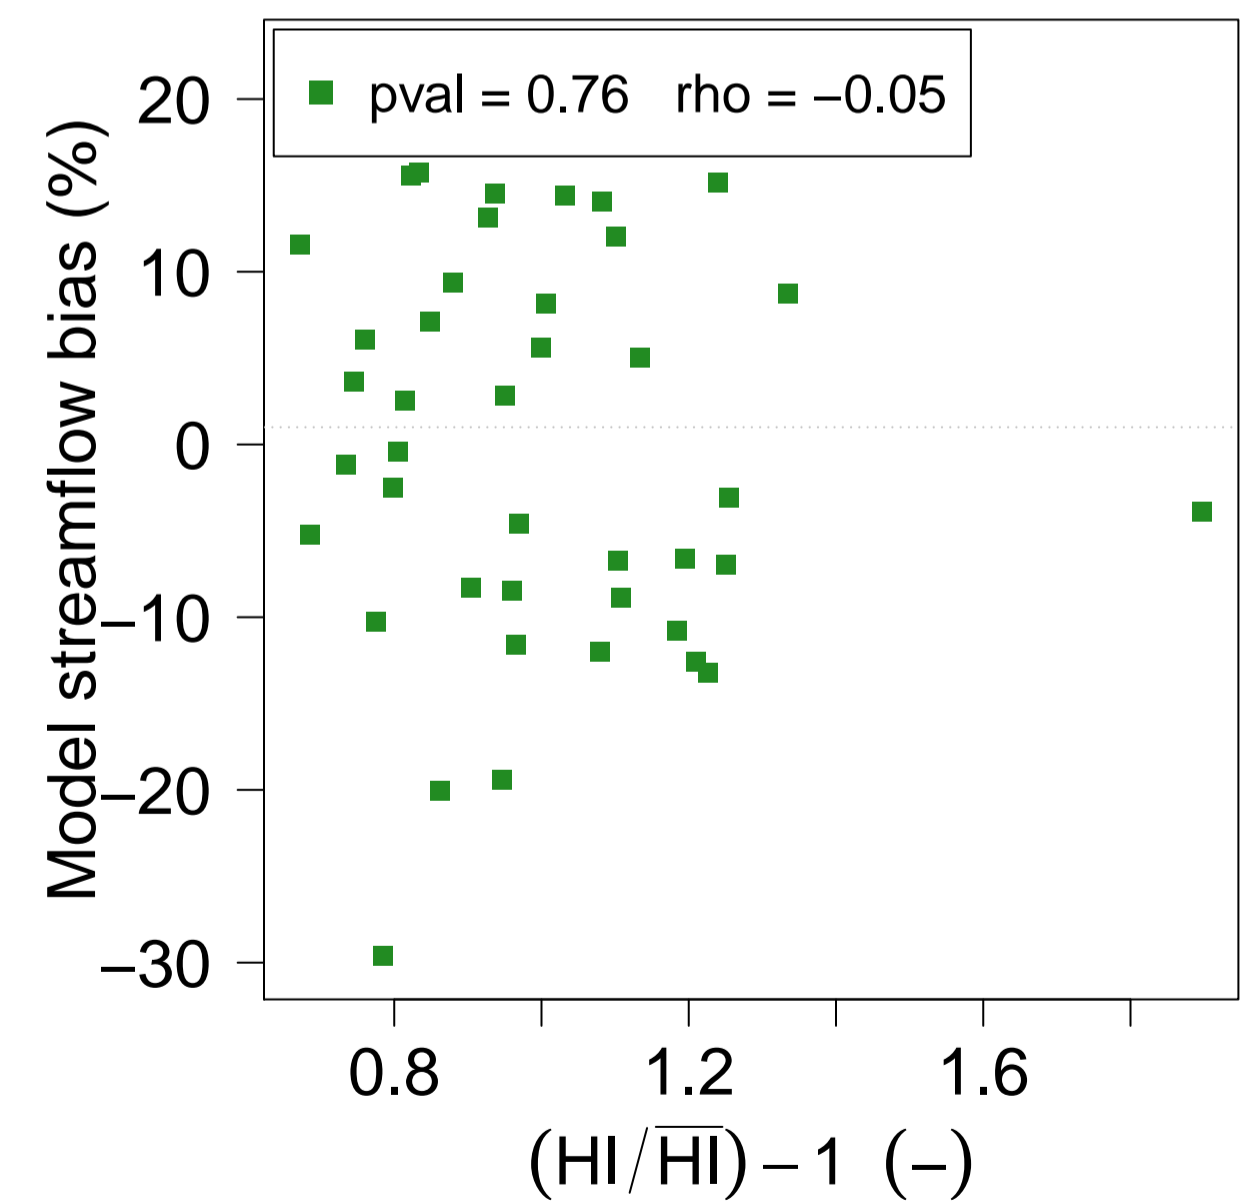

Figure 16. Streamflow annual bias obtained with the RAT function of time (top), temperature absolute anomalies (bottom left) and precipitation  $P$  (bottom centre) and humidity index  $P/E_0$  (bottom right) anomalies, for the catchment O7101510

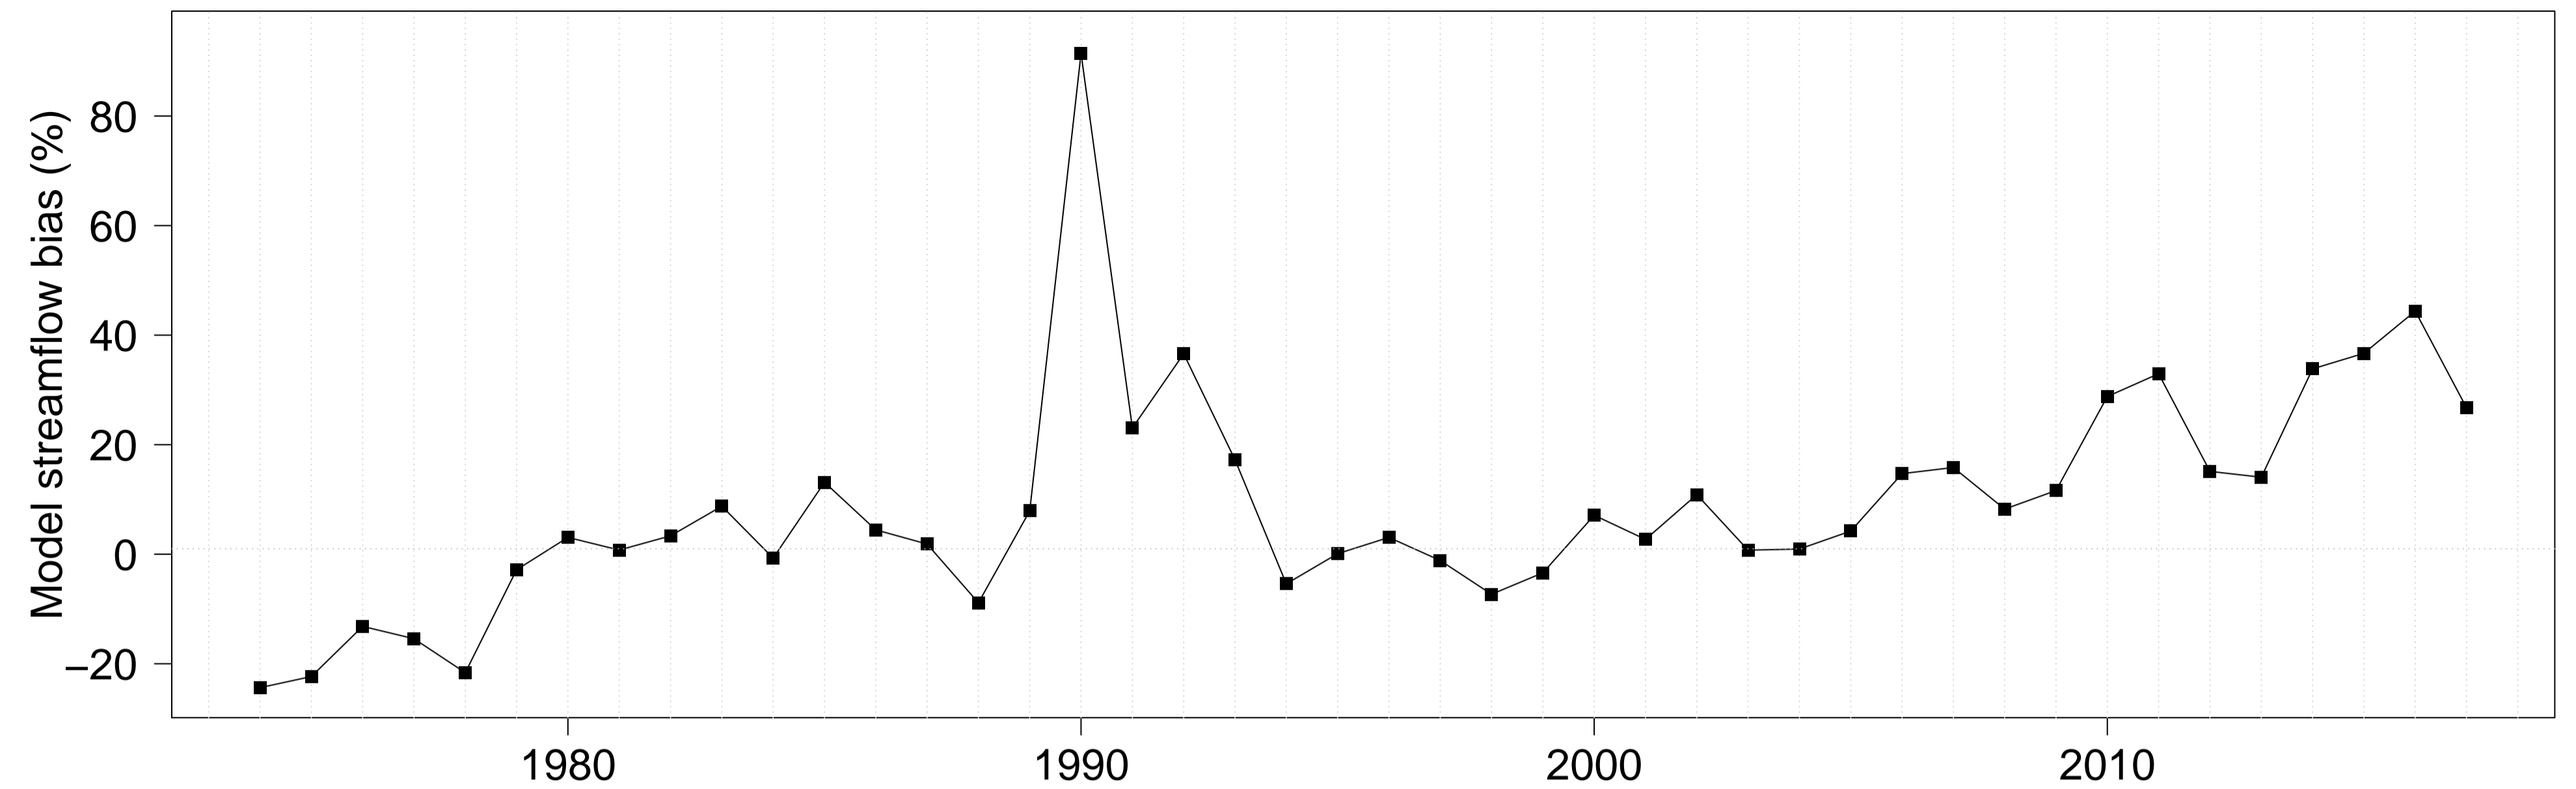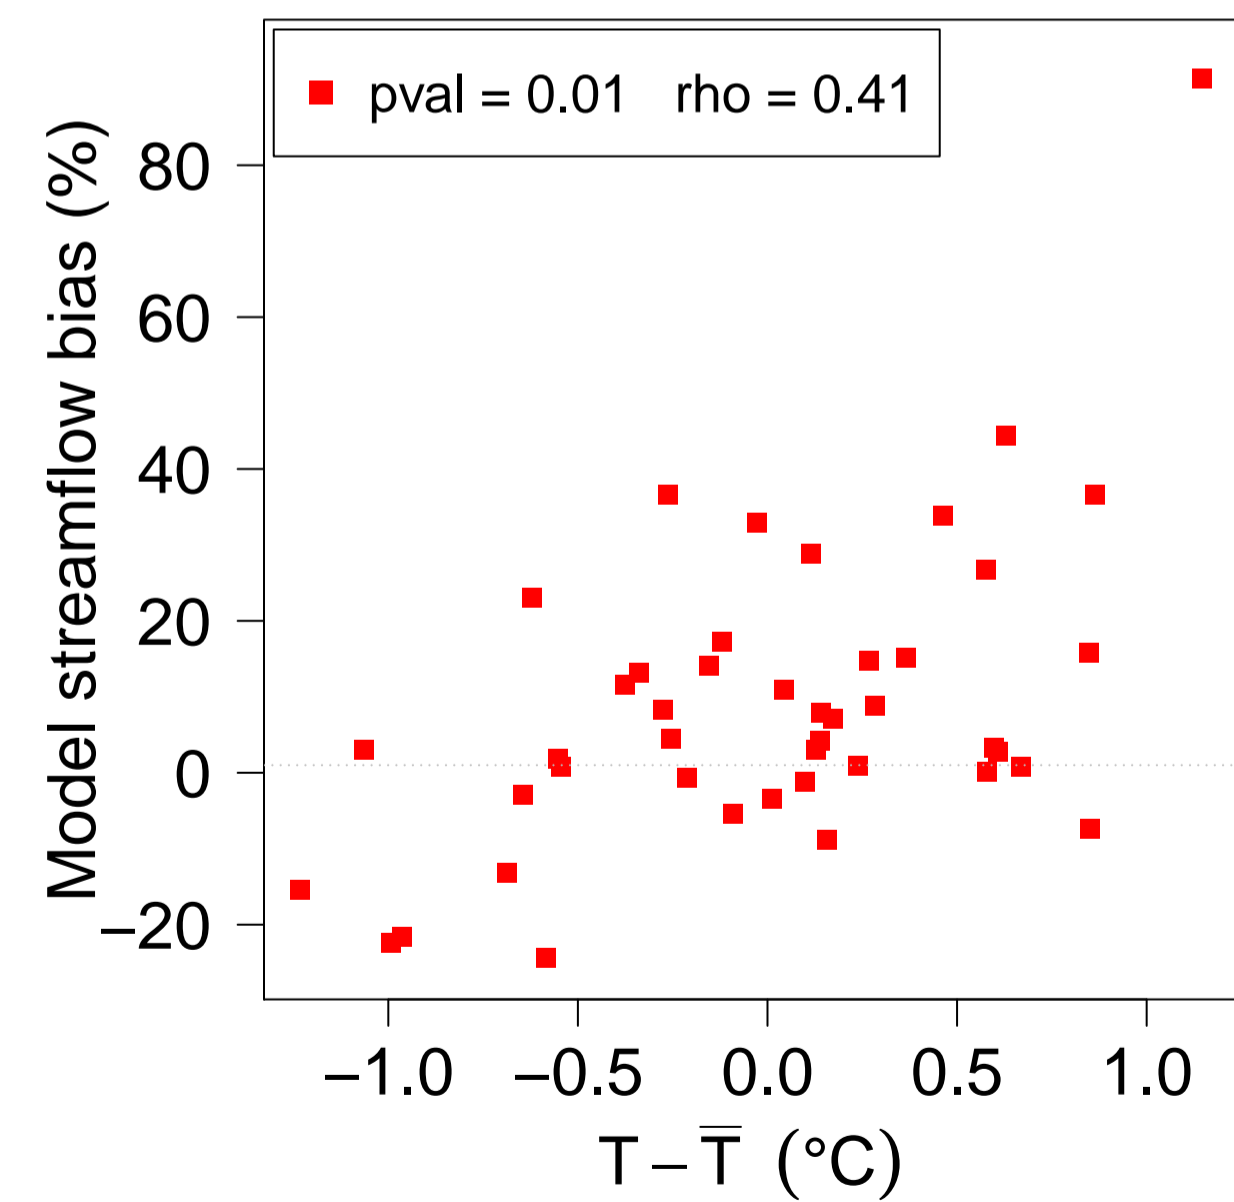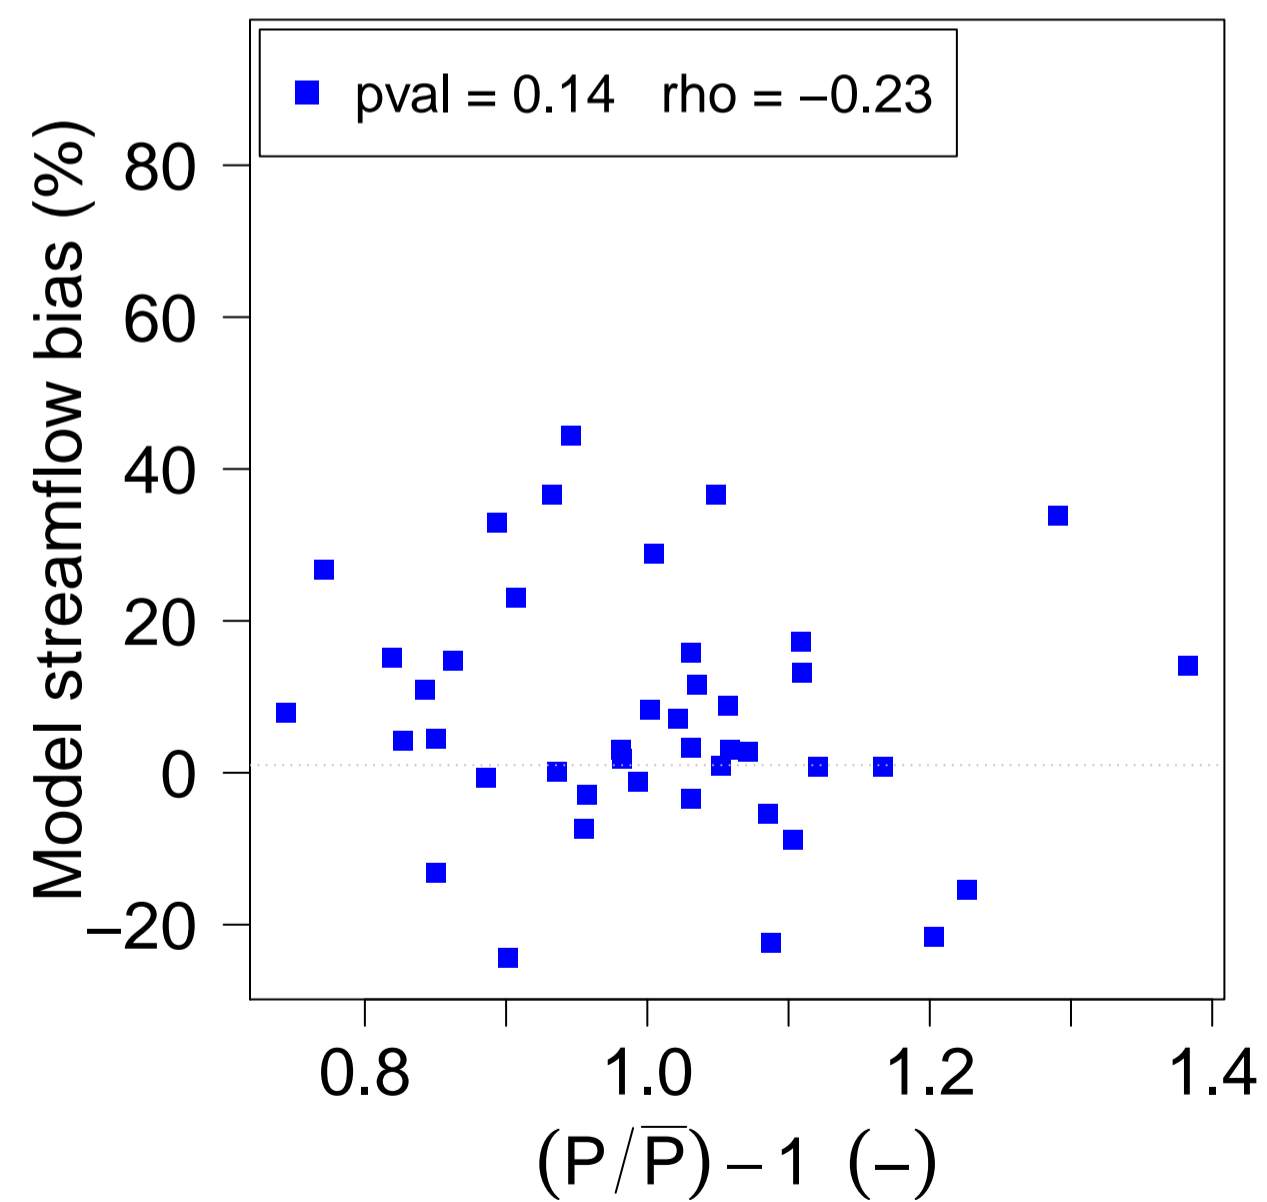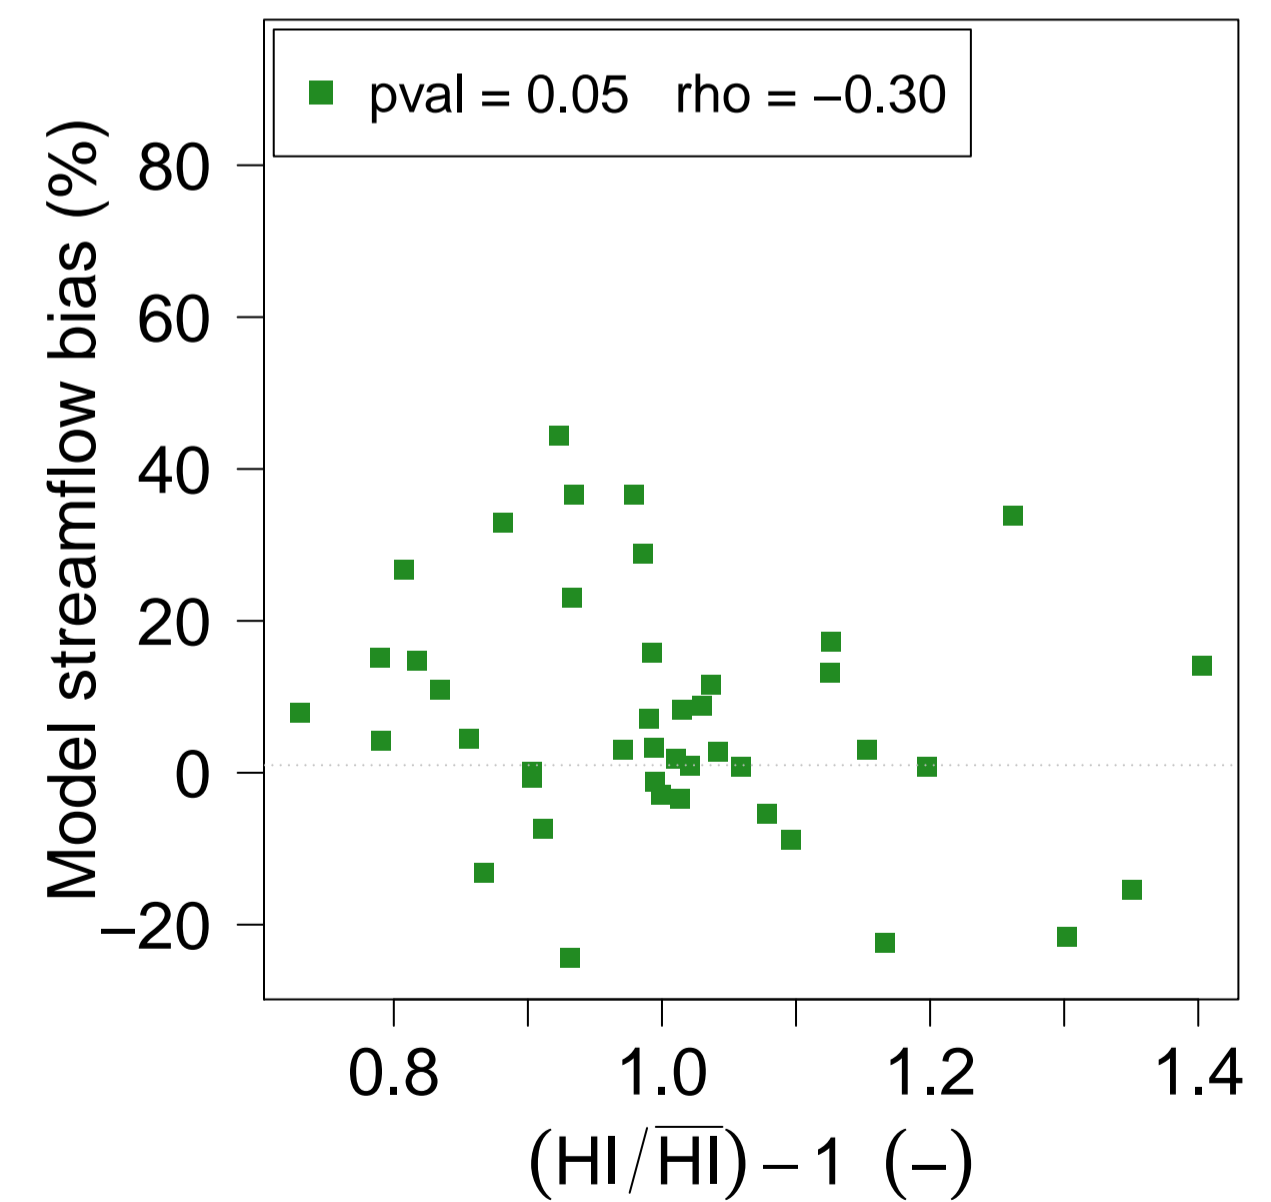

Figure 17. Streamflow annual bias obtained with the RAT function of time (top), temperature absolute anomalies (bottom left) and precipitation  $P$  (bottom centre) and humidity index  $P/E_0$  (bottom right) anomalies, for the catchment Q5501010



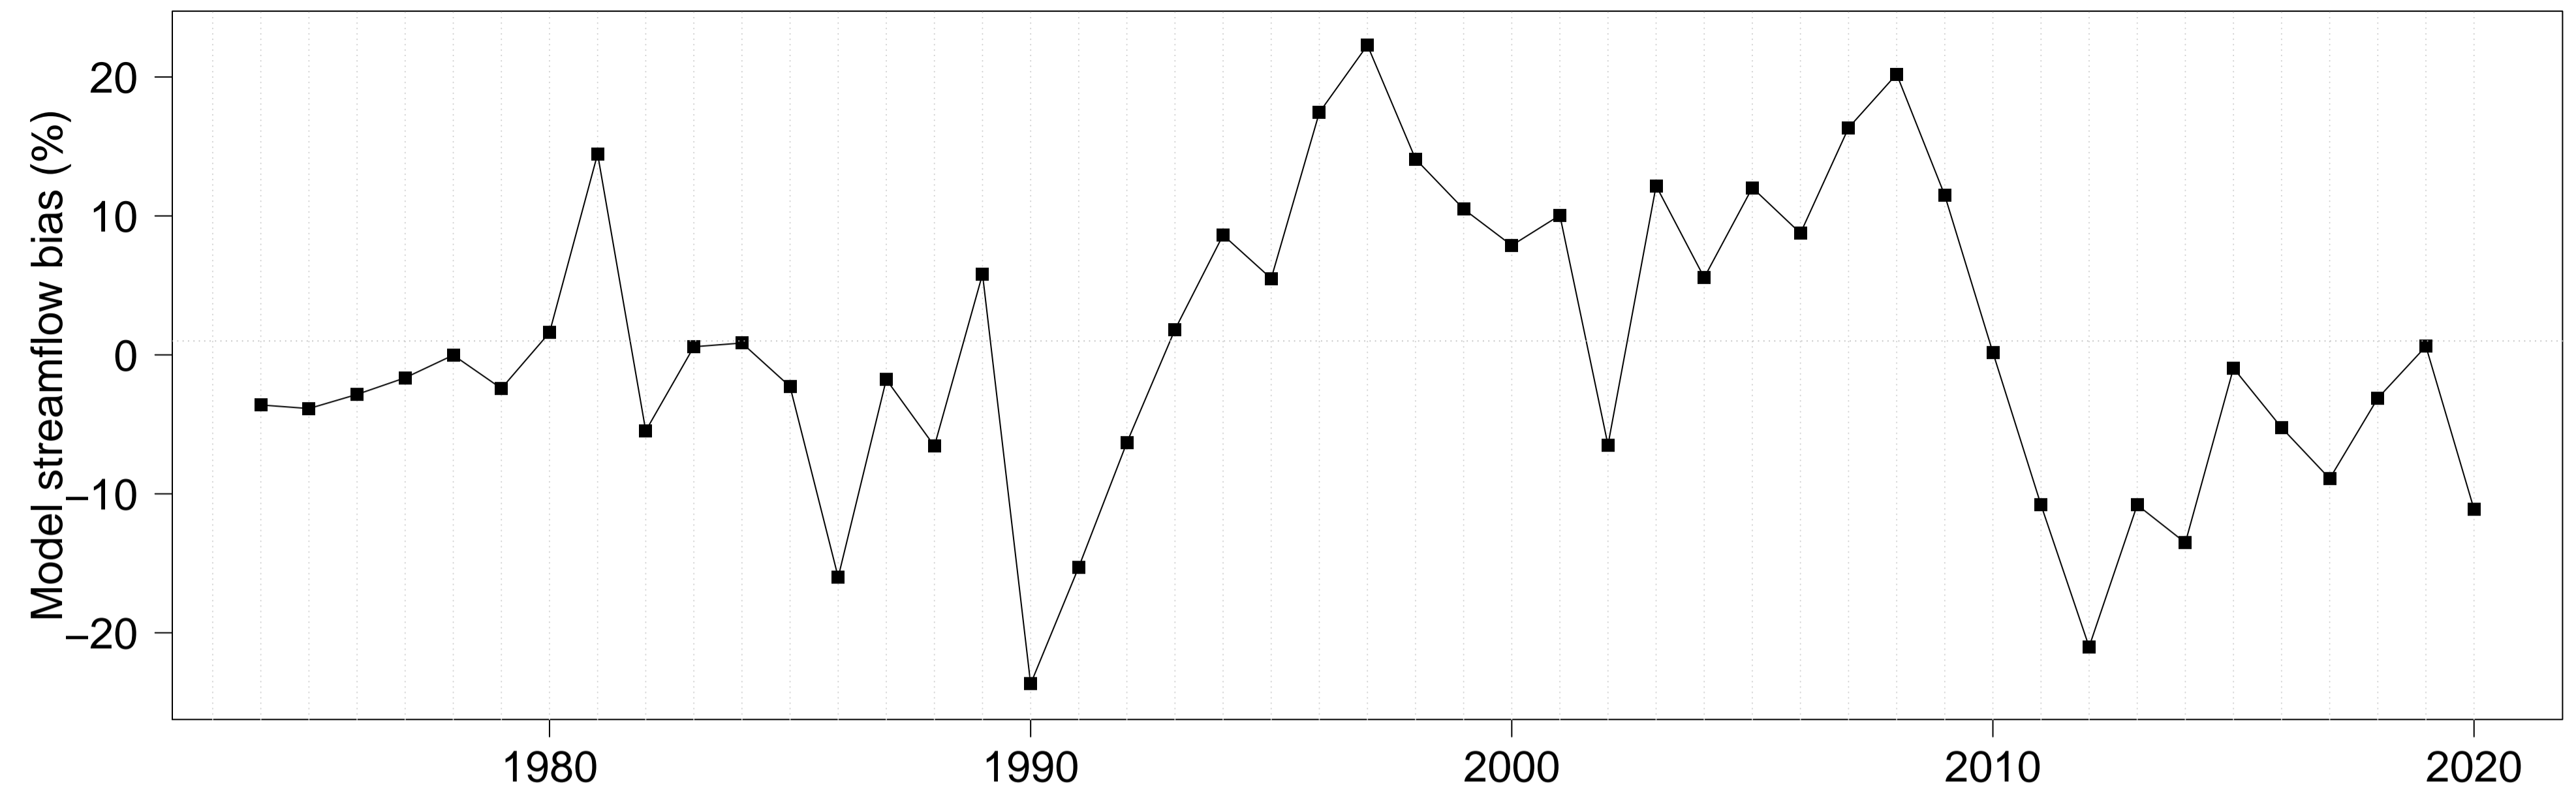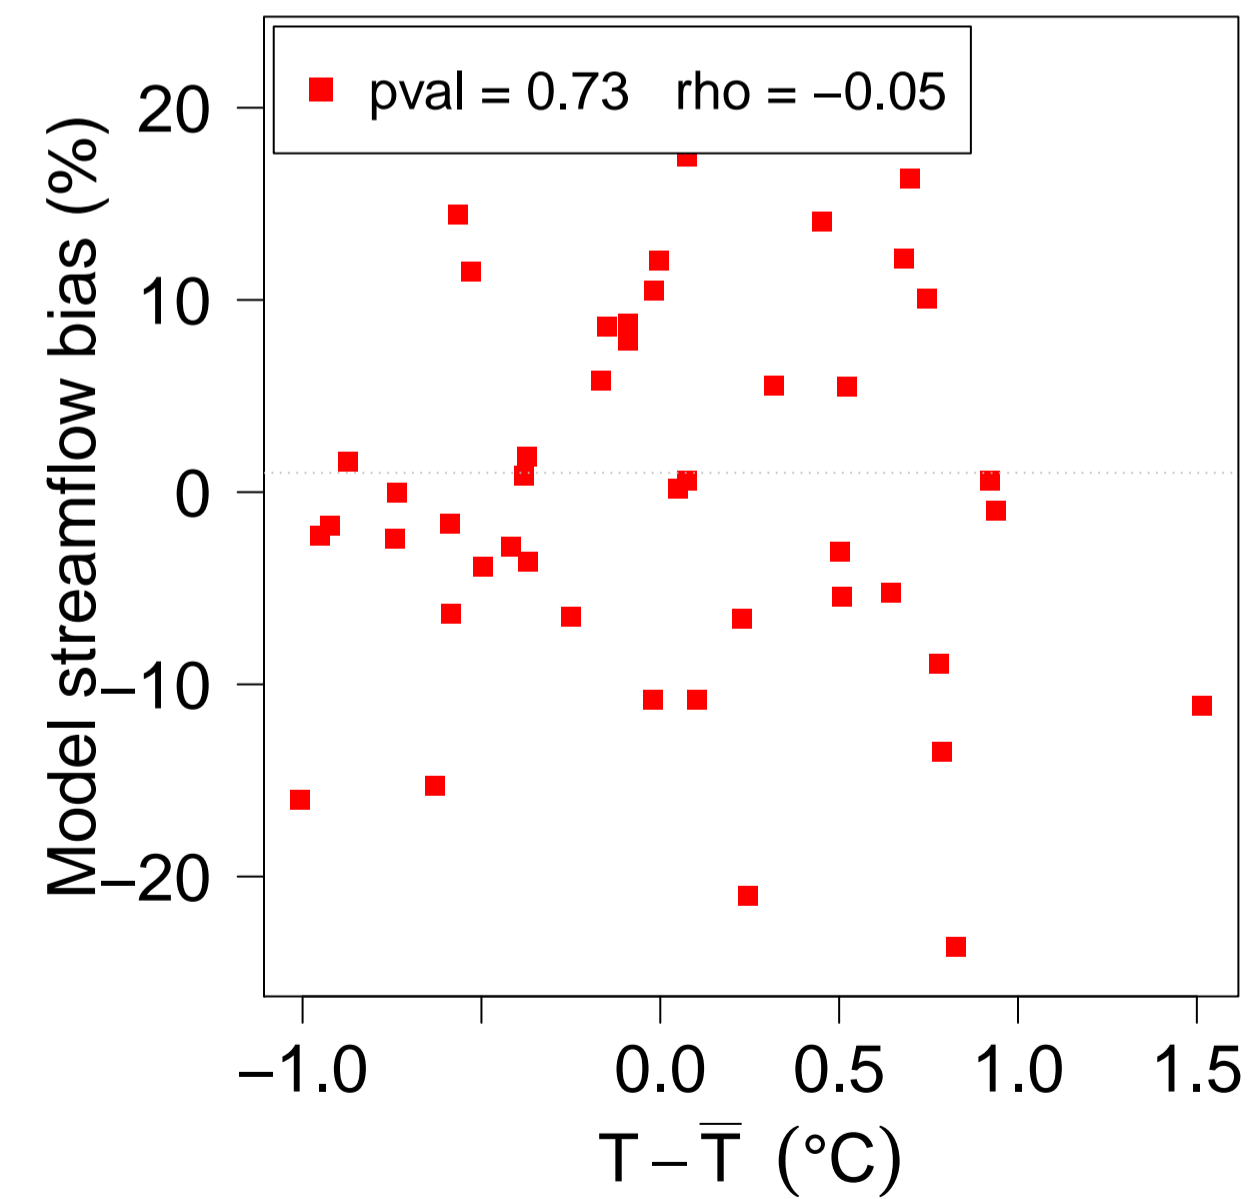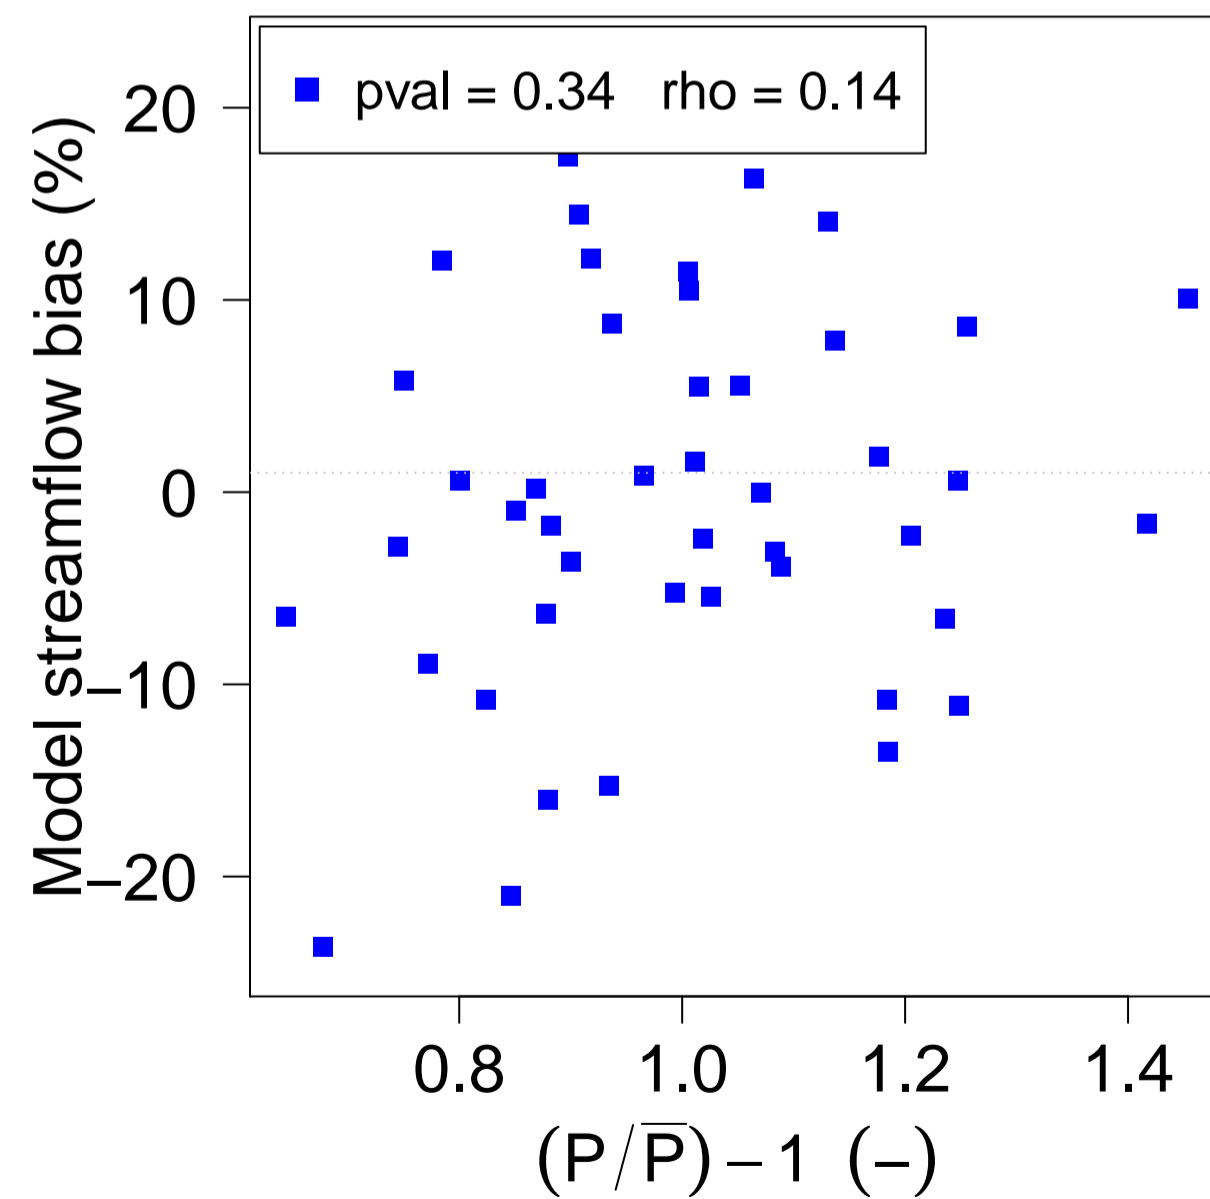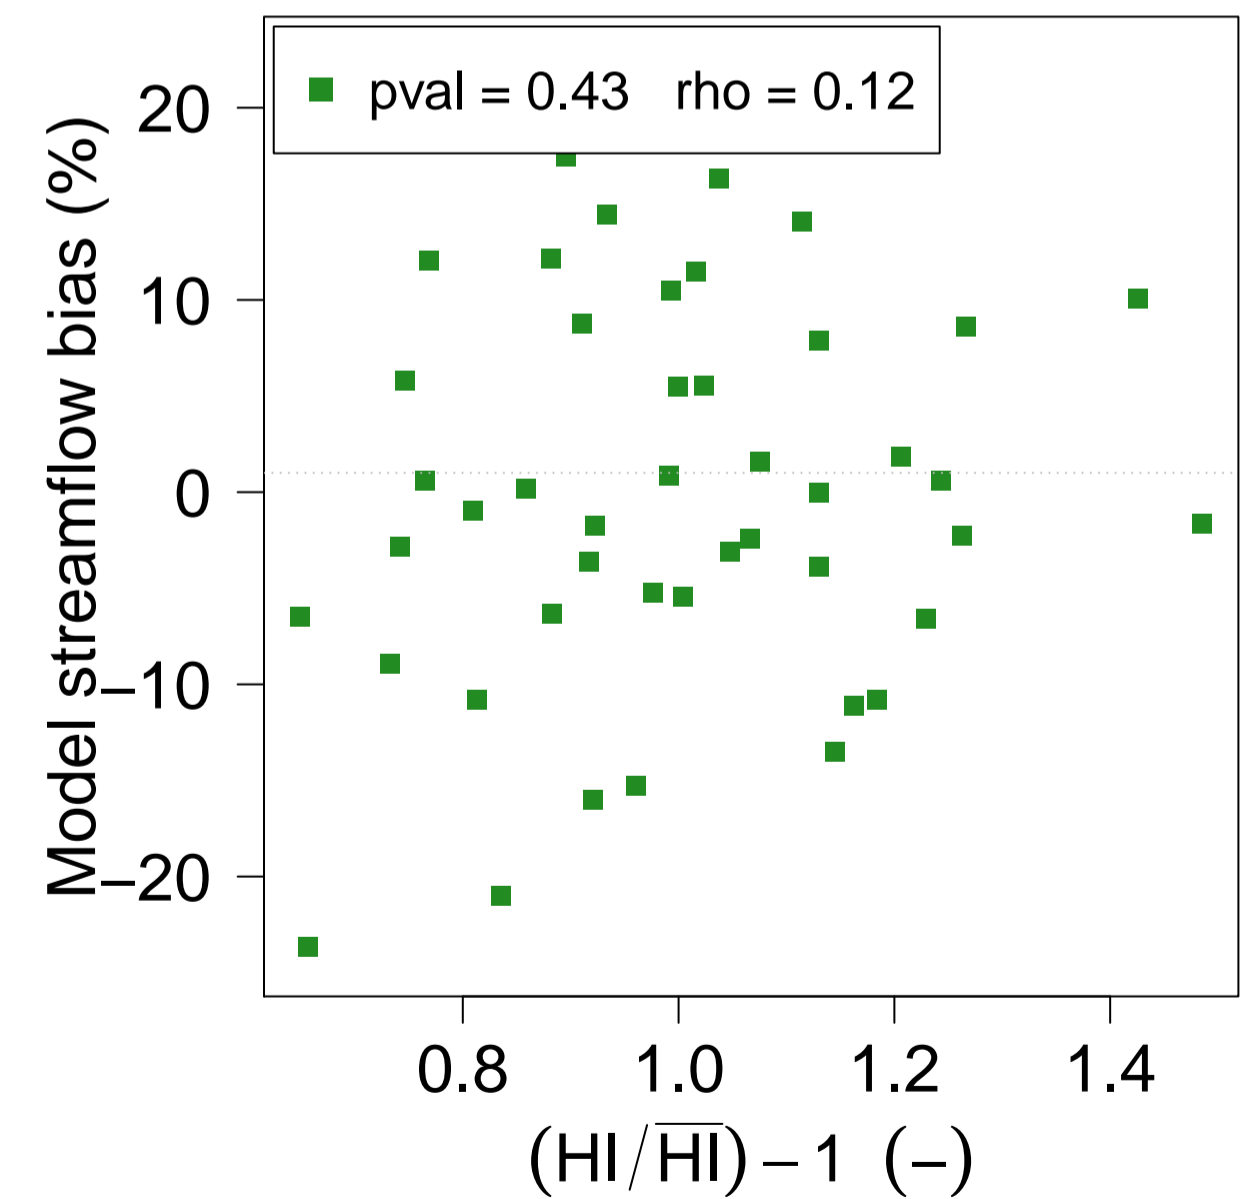

Figure 18. Streamflow annual bias obtained with the RAT function of time (top), temperature absolute anomalies (bottom left) and precipitation  $P$  (bottom centre) and humidity index  $P/E_0$  (bottom right) anomalies, for the catchment S2242510

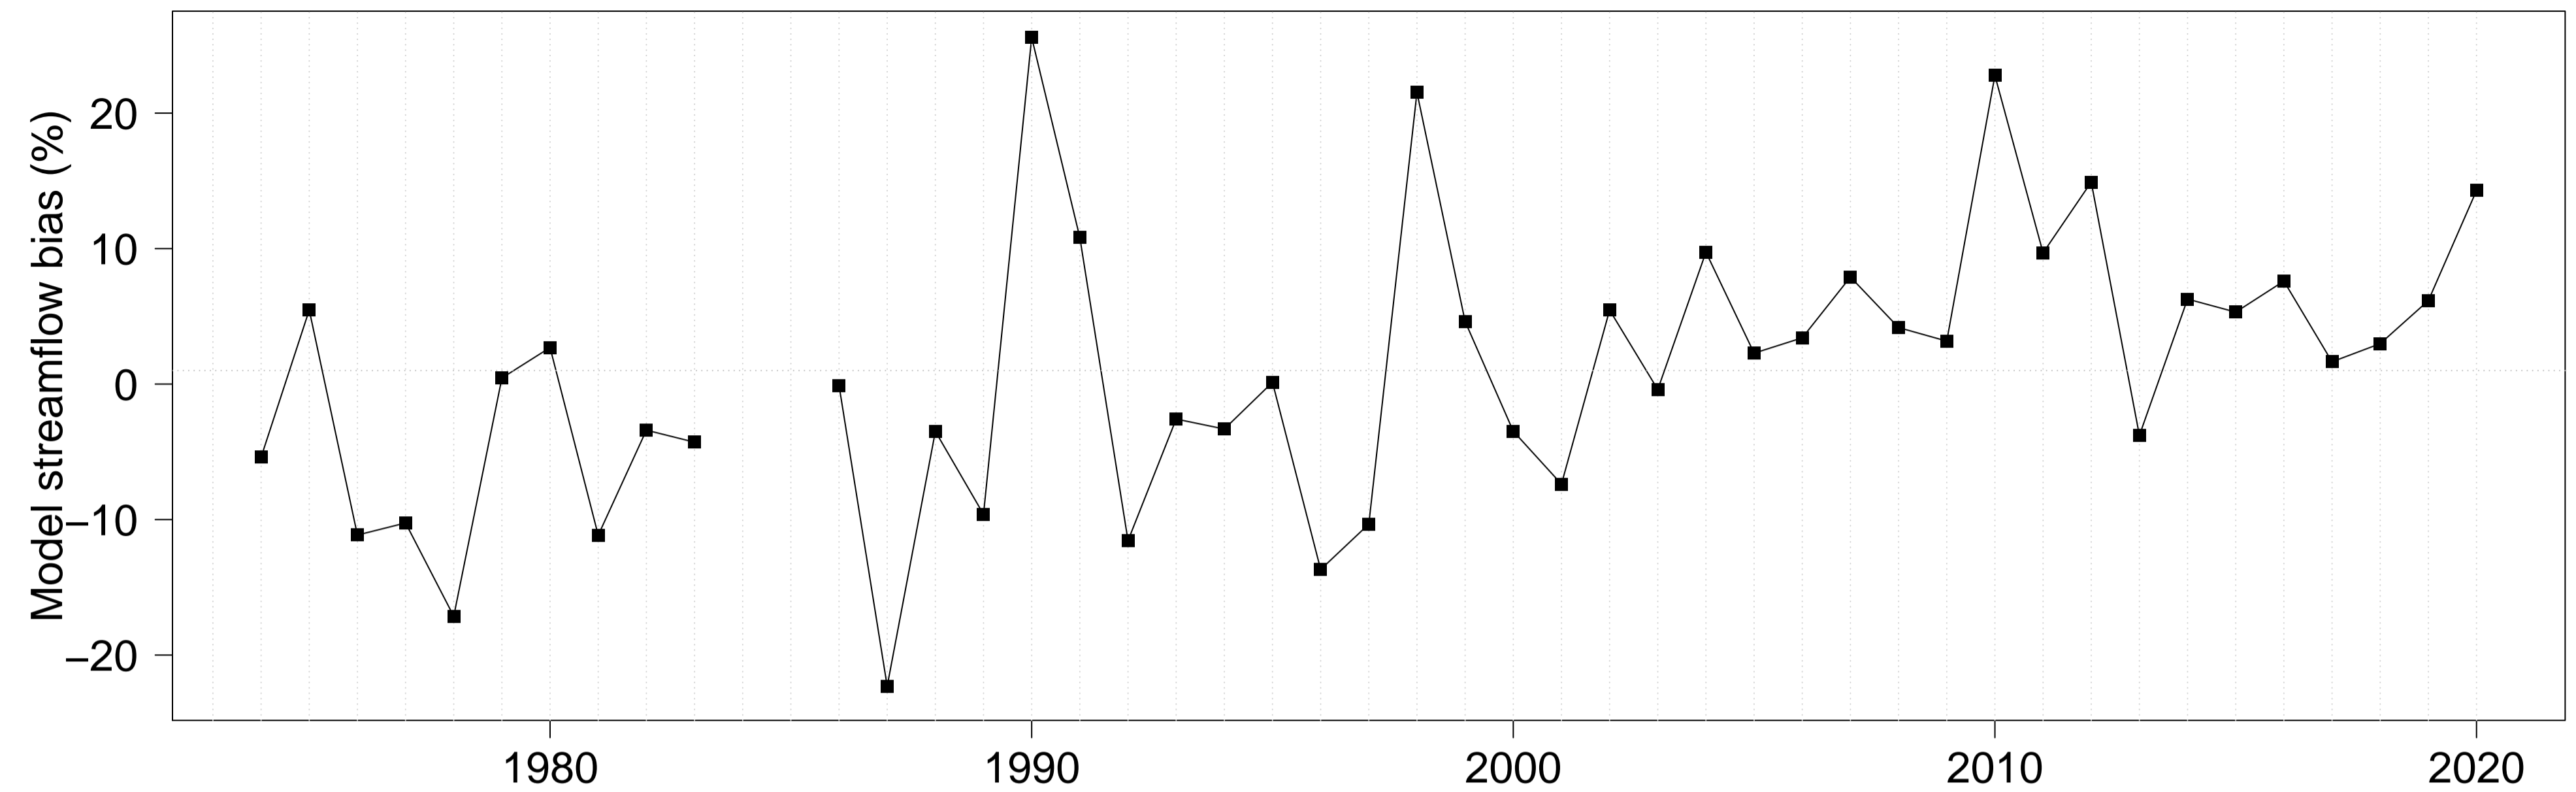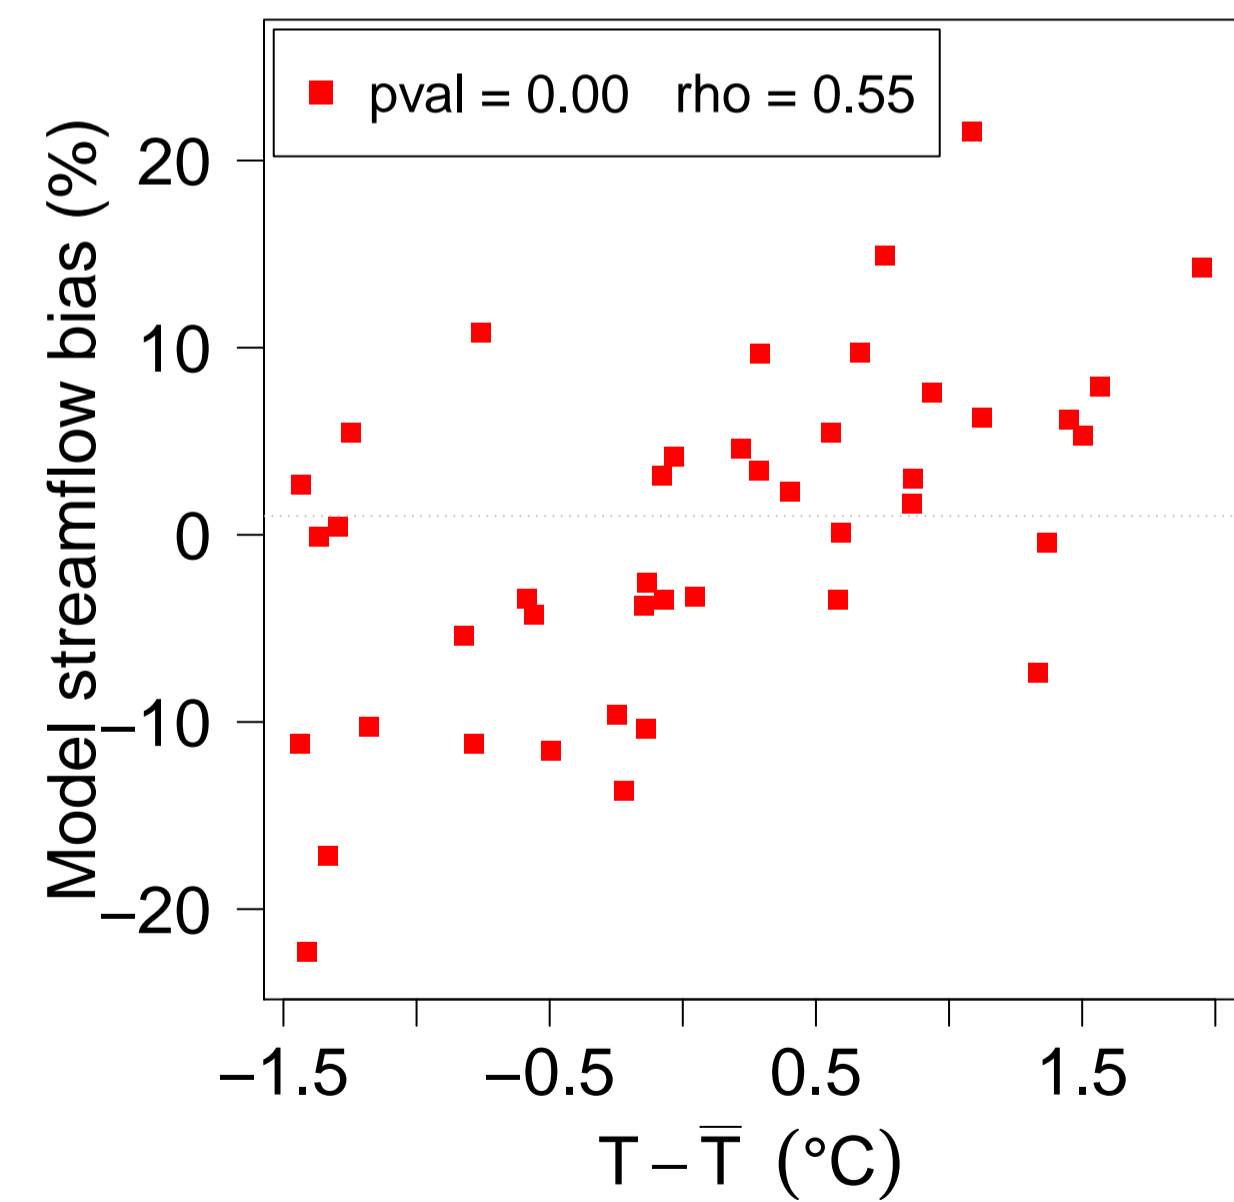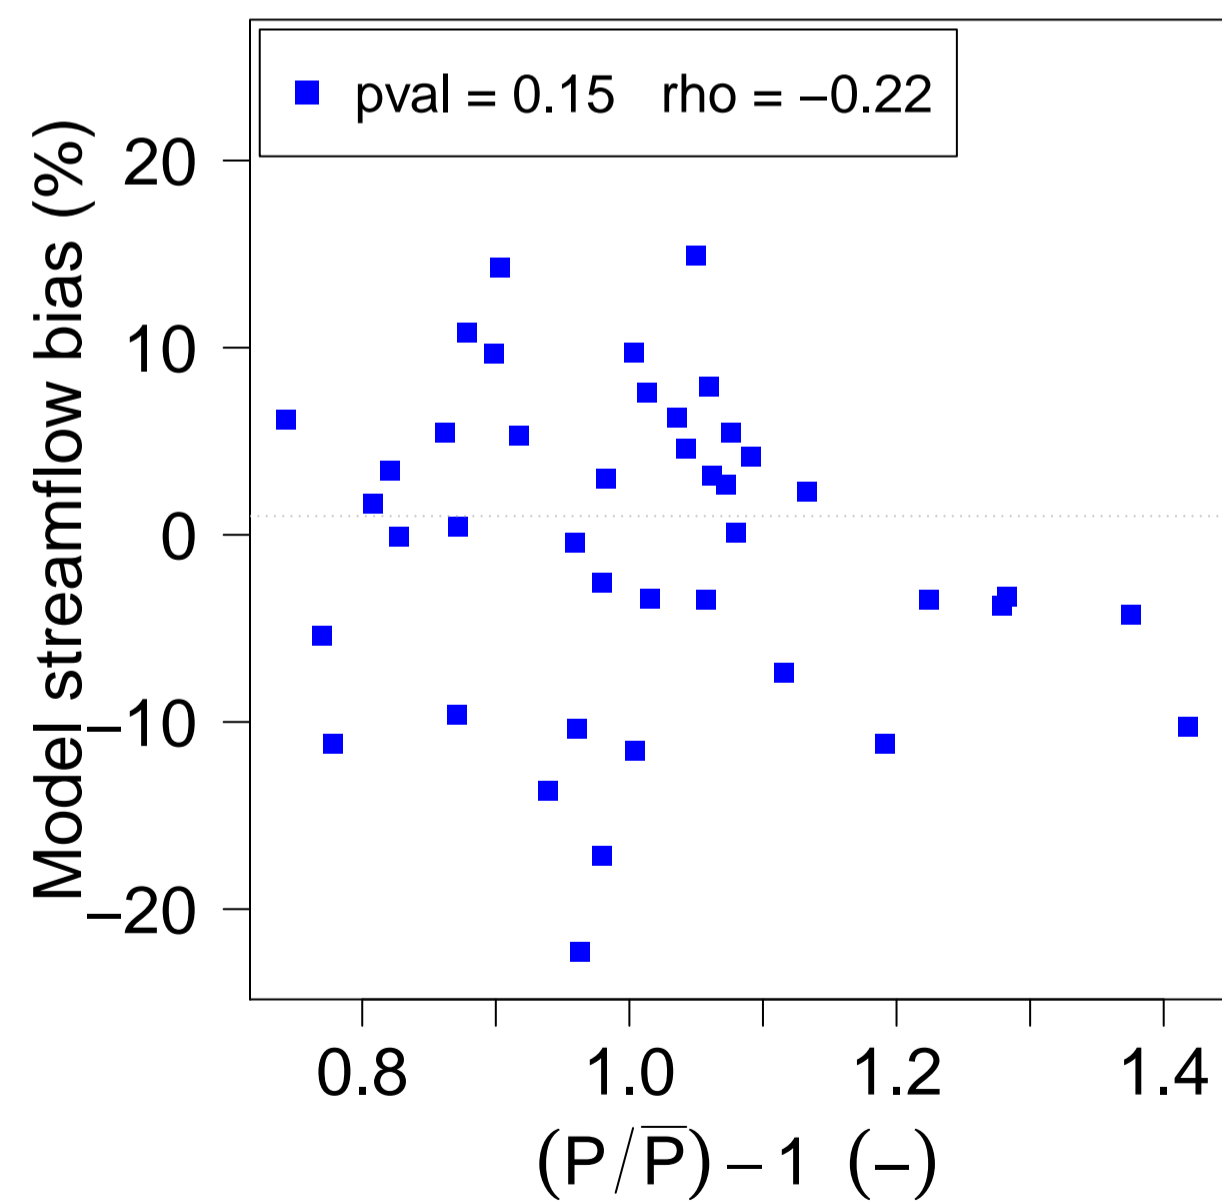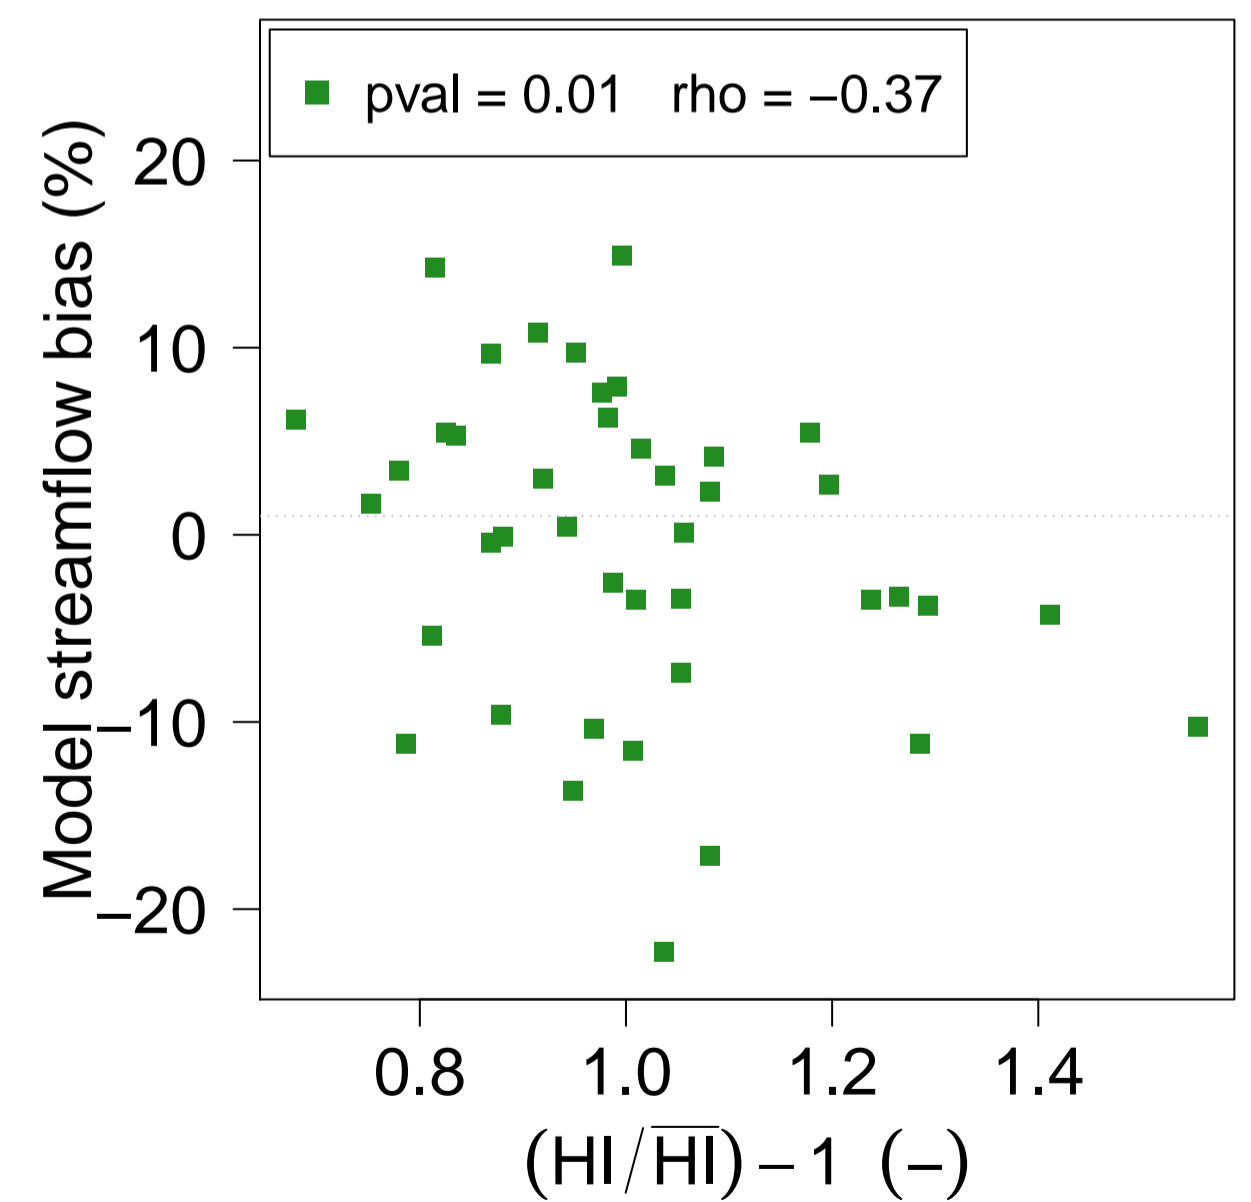

Figure 19. Streamflow annual bias obtained with the RAT function of time (top), temperature absolute anomalies (bottom left) and precipitation  $P$  (bottom centre) and humidity index  $P/E_0$  (bottom right) anomalies, for the catchment U4644010

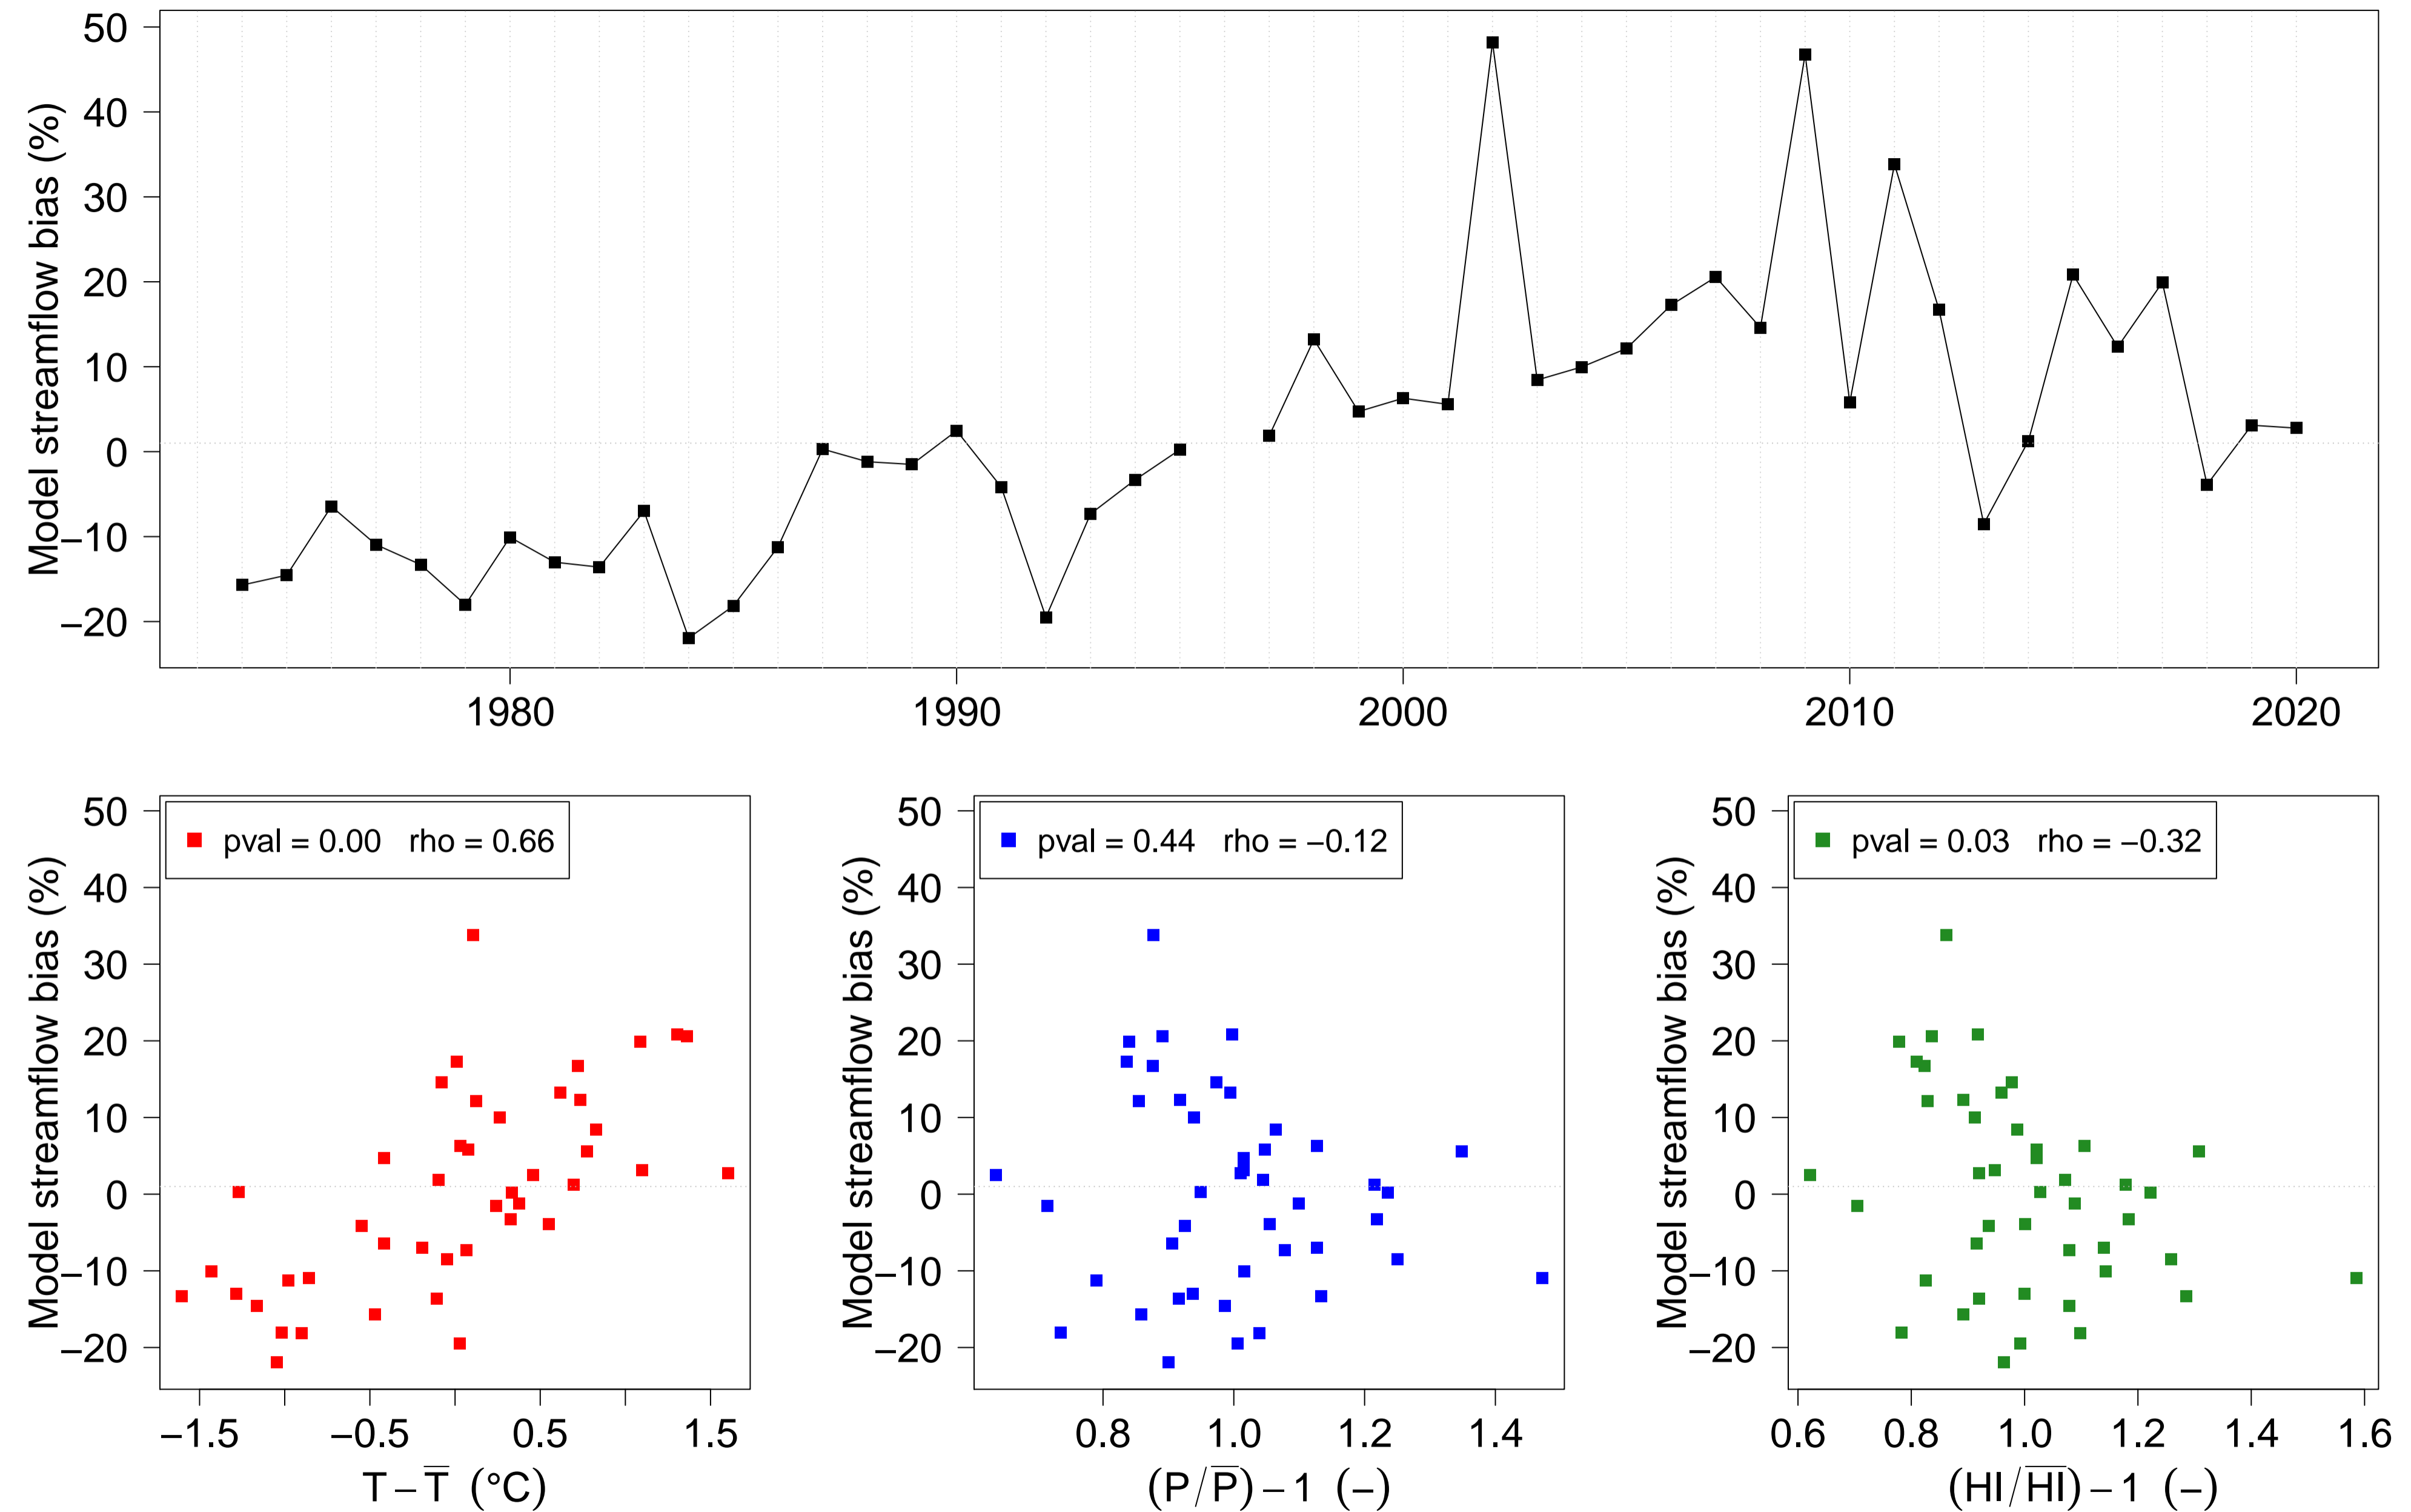

Figure 20. Streamflow annual bias obtained with the RAT function of time (top), temperature absolute anomalies (bottom left) and precipitation  $P$  (bottom centre) and humidity index  $P/E_0$  (bottom right) anomalies, for the catchment V4264010

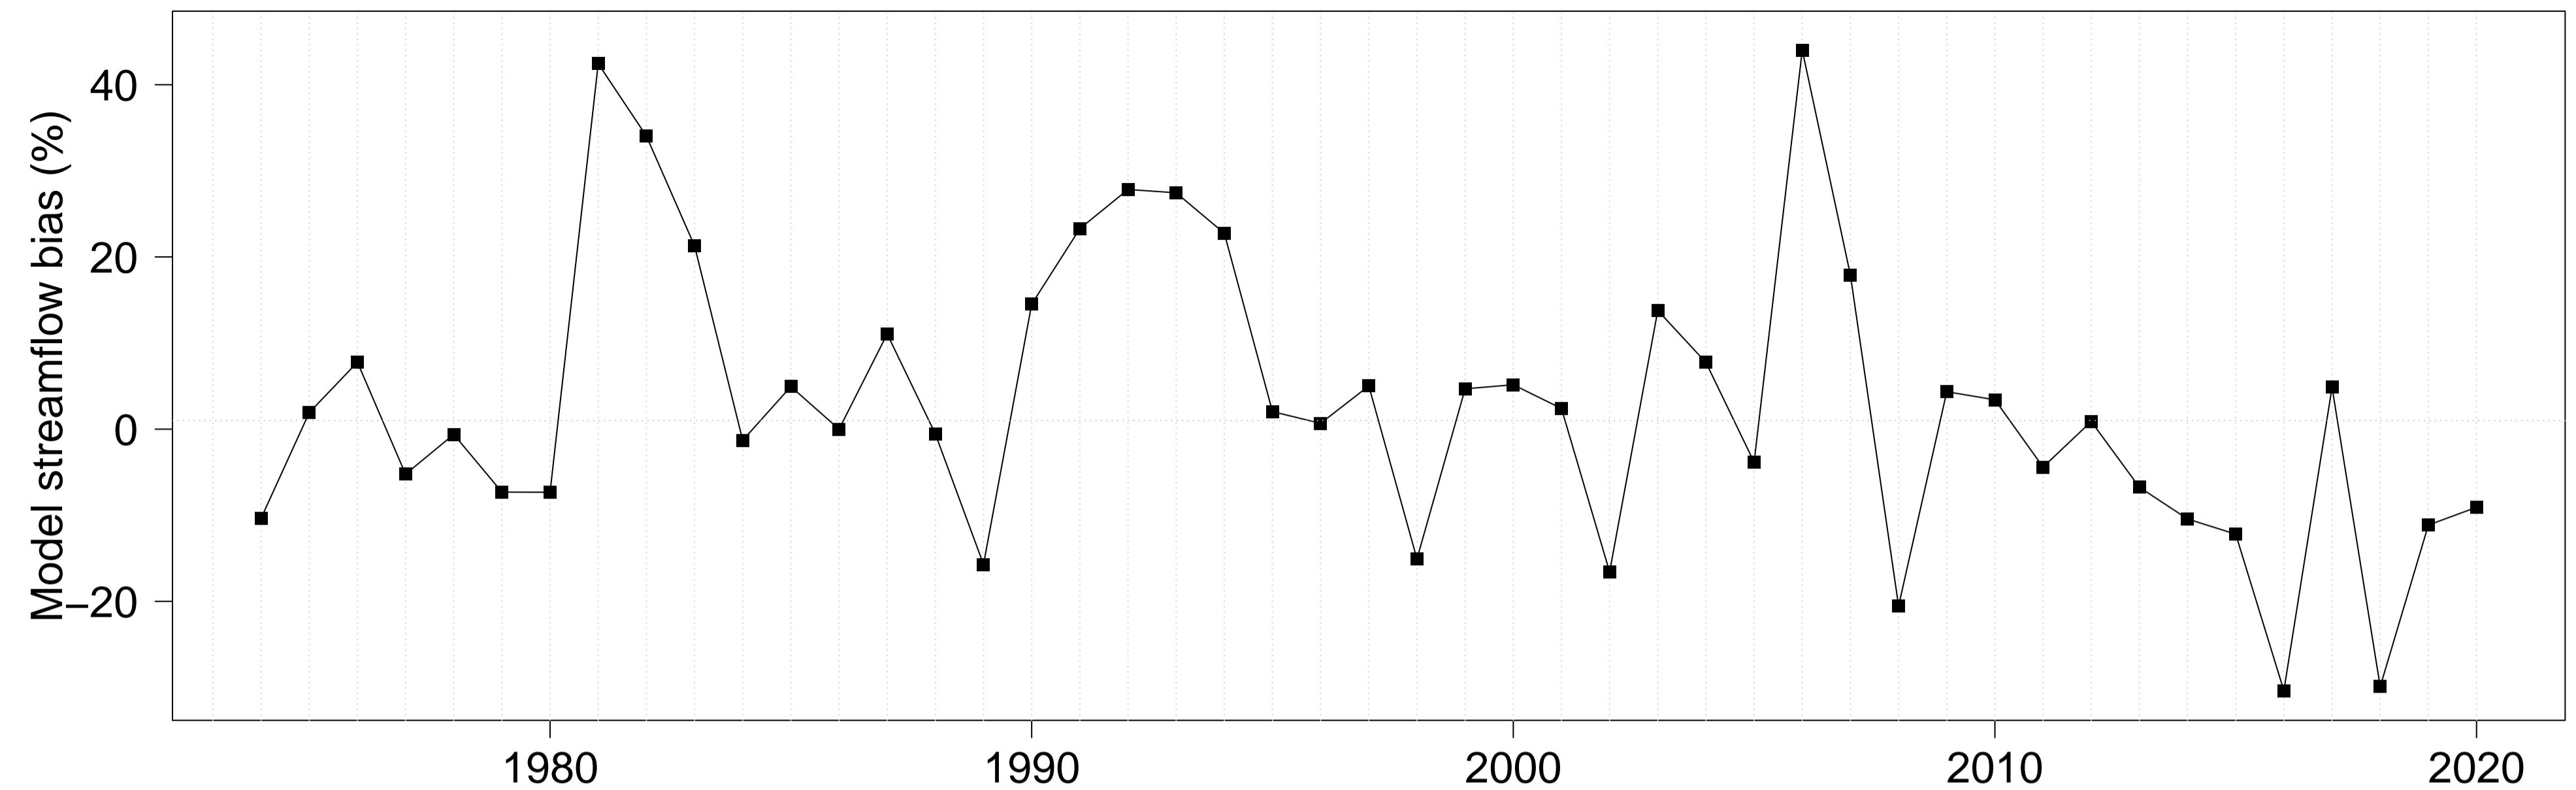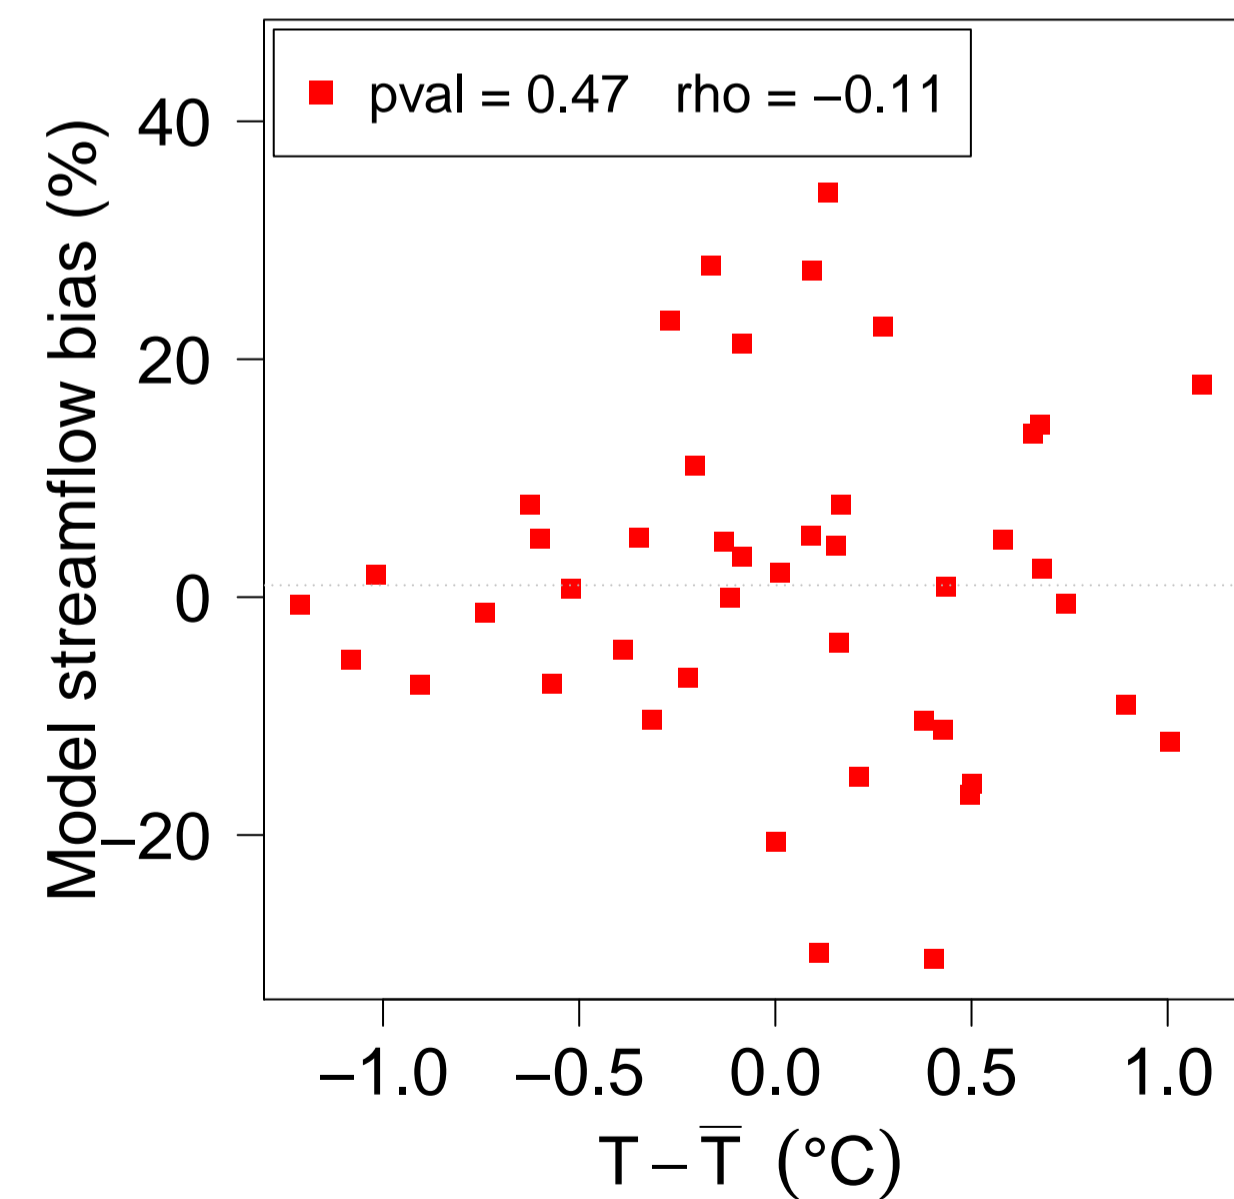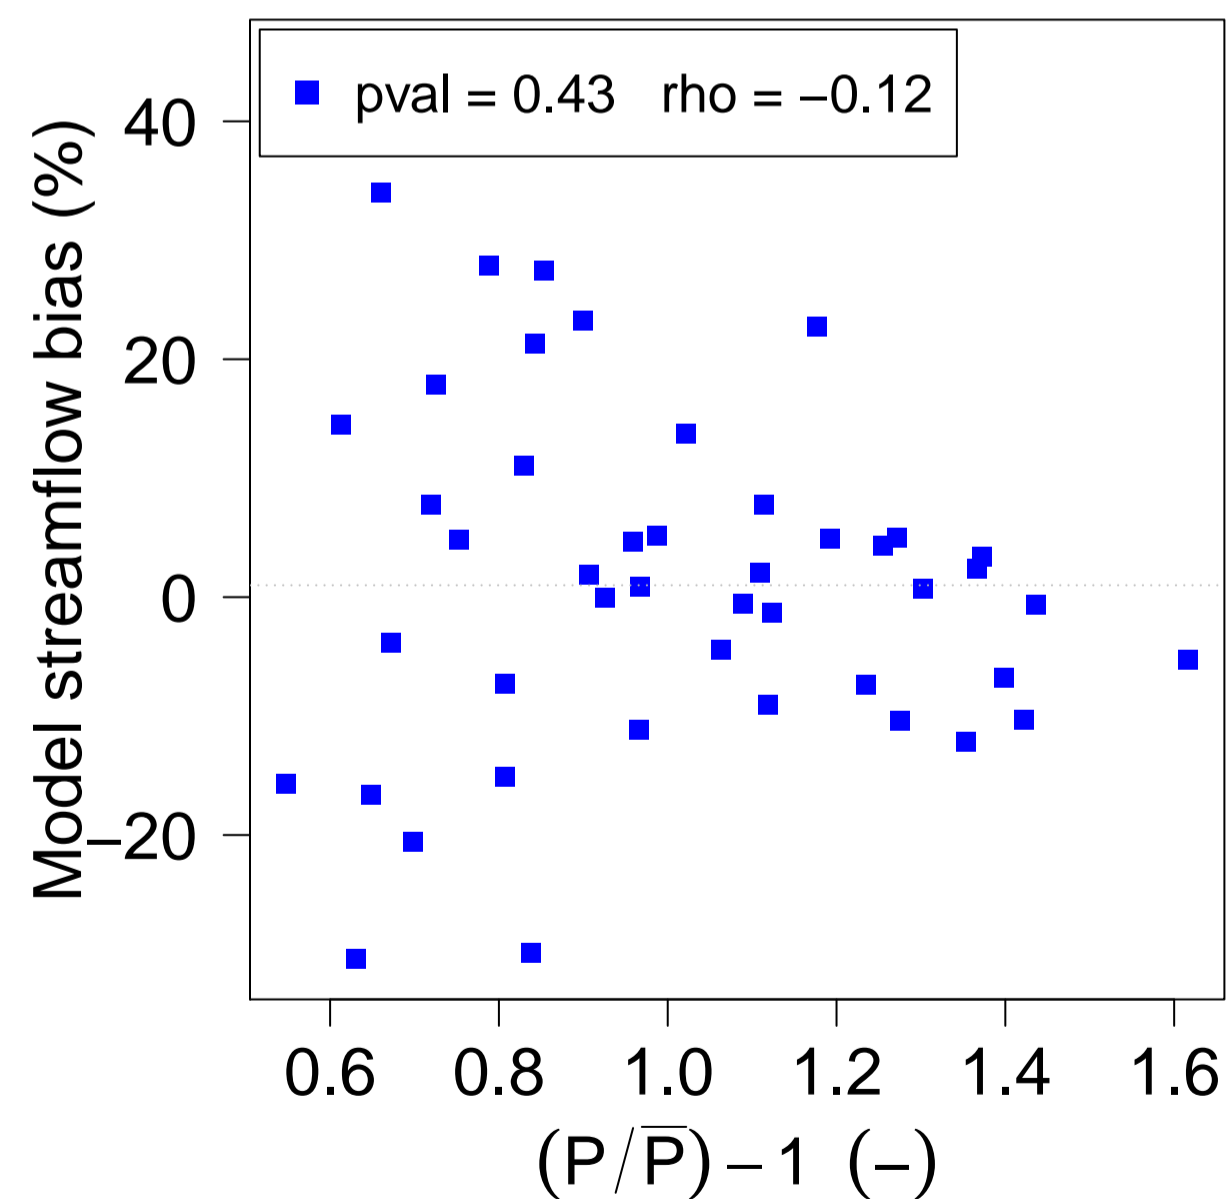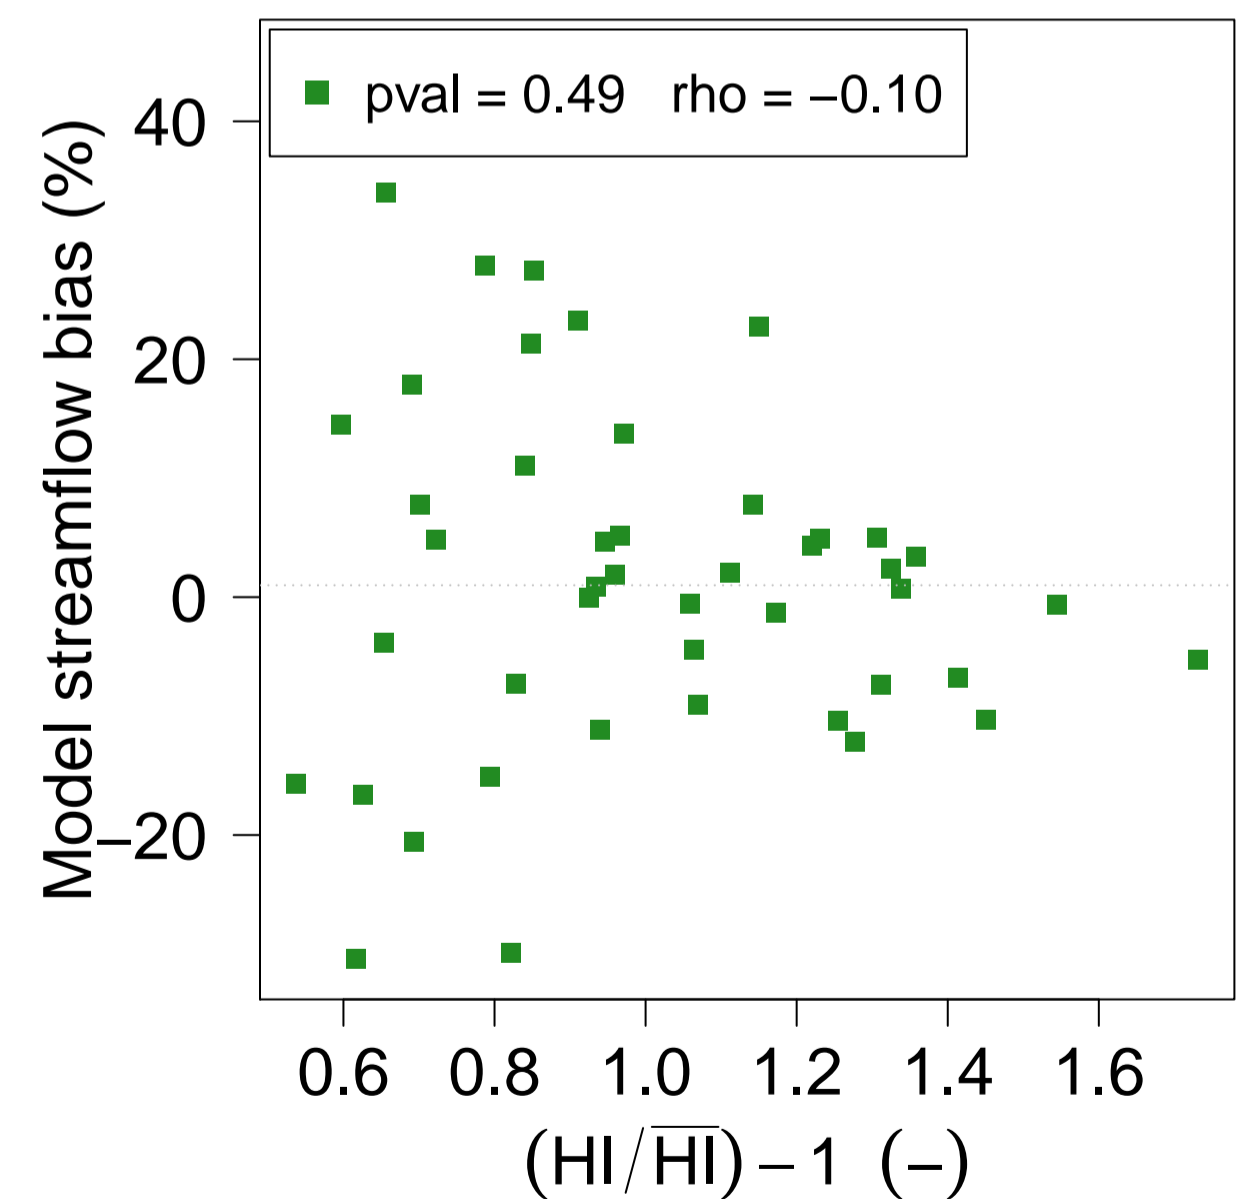

Figure 21. Streamflow annual bias obtained with the RAT function of time (top), temperature absolute anomalies (bottom left) and precipitation  $P$  (bottom centre) and humidity index  $P/E_0$  (bottom right) anomalies, for the catchment Y4624010
